# Supplementary material for: Multicentre, randomised trial of preterm infants receiving caffeine and less invasive surfactant administration compared with caffeine and early continuous positive airway pressure (CaLI trial): study protocol
Source: PubMed Central journal article supplement — BMJ Open. 2021 Jan 22;11(1):e038343. doi: 10.1136/bmjopen-2020-038343 (PMC7825253; doi:10.1136/bmjopen-2020-038343), 2021-01-22
Supplement: bmjopen-2020-038343.draft_revisions.pdf [file bmjopen-2020-038343.draft_revisions.pdf]

# BMJ Open

BMJ Open is committed to open peer review. As part of this commitment we make the peer review history of every article we publish publicly available.

When an article is published we post the peer reviewers' comments and the authors' responses online. We also post the versions of the paper that were used during peer review. These are the versions that the peer review comments apply to.

The versions of the paper that follow are the versions that were submitted during the peer review process. They are not the versions of record or the final published versions. They should not be cited or distributed as the published version of this manuscript.

BMJ Open is an open access journal and the full, final, typeset and author-corrected version of record of the manuscript is available on our site with no access controls, subscription charges or pay-per-view fees (<http://bmjopen.bmj.com>).

If you have any questions on BMJ Open's open peer review process please email [info.bmjopen@bmj.com](mailto:info.bmjopen@bmj.com)

# BMJ Open

## A Multicenter, Randomized Trial of Preterm Infants receiving Caffeine and Less Invasive Surfactant Administration Compared to Caffeine and Early Continuous Positive Airway Pressure (CaLI Trial)

|                               |                                                                                                                                                                                                                                                                                                                                                                                                                                                                                                                                                                                                                                                                   |
|-------------------------------|-------------------------------------------------------------------------------------------------------------------------------------------------------------------------------------------------------------------------------------------------------------------------------------------------------------------------------------------------------------------------------------------------------------------------------------------------------------------------------------------------------------------------------------------------------------------------------------------------------------------------------------------------------------------|
| Journal:                      | <i>BMJ Open</i>                                                                                                                                                                                                                                                                                                                                                                                                                                                                                                                                                                                                                                                   |
| Manuscript ID                 | bmjopen-2020-038343                                                                                                                                                                                                                                                                                                                                                                                                                                                                                                                                                                                                                                               |
| Article Type:                 | Protocol                                                                                                                                                                                                                                                                                                                                                                                                                                                                                                                                                                                                                                                          |
| Date Submitted by the Author: | 16-Mar-2020                                                                                                                                                                                                                                                                                                                                                                                                                                                                                                                                                                                                                                                       |
| Complete List of Authors:     | Ines, Felix; Sharp Mary Birch Hospital for Women and Newborns, Neonatal Research Institute<br>Hutson, Shandee; Sharp Mary Birch Hospital for Women and Newborns<br>Coughlin, Katherine; Sharp Mary Birch Hospital for Women and Newborns<br>Hopper, Andrew; Loma Linda University Medical Center<br>Banerji, Anamika; Loma Linda University Medical Center<br>Finer, Neil; University of California San Diego<br>Rich, Wade; Sharp Mary Birch Hospital for Women and Newborns<br>Morales, Ana; Sharp Mary Birch Hospital for Women and Newborns<br>Steen, Jane; Sharp Mary Birch Hospital for Women and Newborns<br>Katheria, Anup; Sharp Mary Birch, Neonatology |
| Keywords:                     | Neonatal intensive & critical care < INTENSIVE & CRITICAL CARE, NEONATOLOGY, RESPIRATORY MEDICINE (see Thoracic Medicine)                                                                                                                                                                                                                                                                                                                                                                                                                                                                                                                                         |
|                               |                                                                                                                                                                                                                                                                                                                                                                                                                                                                                                                                                                                                                                                                   |

SCHOLARONE™  
Manuscripts

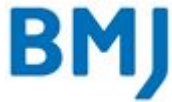

I, the Submitting Author has the right to grant and does grant on behalf of all authors of the Work (as defined in the below author licence), an exclusive licence and/or a non-exclusive licence for contributions from authors who are: i) UK Crown employees; ii) where BMJ has agreed a CC-BY licence shall apply, and/or iii) in accordance with the terms applicable for US Federal Government officers or employees acting as part of their official duties; on a worldwide, perpetual, irrevocable, royalty-free basis to BMJ Publishing Group Ltd ("BMJ") its licensees and where the relevant Journal is co-owned by BMJ to the co-owners of the Journal, to publish the Work in this journal and any other BMJ products and to exploit all rights, as set out in our [licence](#).

The Submitting Author accepts and understands that any supply made under these terms is made by BMJ to the Submitting Author unless you are acting as an employee on behalf of your employer or a postgraduate student of an affiliated institution which is paying any applicable article publishing charge ("APC") for Open Access articles. Where the Submitting Author wishes to make the Work available on an Open Access basis (and intends to pay the relevant APC), the terms of reuse of such Open Access shall be governed by a Creative Commons licence – details of these licences and which [Creative Commons](#) licence will apply to this Work are set out in our licence referred to above.

Other than as permitted in any relevant BMJ Author's Self Archiving Policies, I confirm this Work has not been accepted for publication elsewhere, is not being considered for publication elsewhere and does not duplicate material already published. I confirm all authors consent to publication of this Work and authorise the granting of this licence.

1  
2  
3 **A Multicenter, Randomized Trial of Preterm Infants receiving Caffeine and**  
4 **Less Invasive Surfactant Administration Compared to Caffeine and Early**  
5  
6 **Continuous Positive Airway Pressure (CaLI Trial)**  
7  
8  
9

10  
11 Felix Ines, Shandee Hutson, Katherine Coughlin, Andrew Hopper, Anamika Banerji, Neil Finer, Wade  
12  
13 Rich, Ana Morales, Jane Steen, Anup Katheria\*

14  
15  
16  
17 Neonatal Research Institute, Sharp Mary Birch Hospital for Women & Newborns, San Diego, CA, United  
18  
19 States.

20  
21  
22  
23  
24 Loma Linda University Medical Center, Loma Linda, CA, United States.

25  
26  
27  
28 Corresponding author: Anup Katheria M.D., Neonatal Research Institute, Sharp Mary Birch Hospital for  
29  
30 Women & Newborns, San Diego, CA, United States. Email: Anup.Katheria@sharp.com  
31  
32  
33  
34  
35  
36  
37  
38  
39  
40  
41  
42  
43  
44  
45  
46  
47  
48  
49  
50  
51  
52  
53  
54  
55  
56  
57

## ABSTRACT

**Introduction:** Delivery room resuscitation of the very preterm infant has evolved dramatically over the past decades. Optimizing the care of these newborns now involves a variation of early continuous positive airway pressure (CPAP) and the avoidance of mechanical ventilation. A recent meta-analysis of non-invasive ventilation strategies demonstrated that Less invasive surfactant administration (LISA) had the lowest odd ratio (OR, 0.49; 95% CI 0.3-0.79) for the development of the composite outcome of death or bronchopulmonary dysplasia (BPD) amongst non-invasive strategies compared to mechanical ventilation. Despite these results and studies showing it decreased the need for mechanical ventilation compared to CPAP, the use of the LISA method is still not widely accepted<sup>4</sup>. We will conduct a randomized, multicenter trial to test whether infants that receive caffeine and surfactant via the LISA method compared to early CPAP and positive pressure ventilation have a decreased need for mechanical ventilation in the first 72 hours of life.

### Methods and Analysis:

After 5 minutes of life, consented infants that are assessed by a provider as clinically stable (i.e. HR >100 bpm) and spontaneously breathing on CPAP will be randomized by computer generated randomization cards placed in opaque envelopes. For infants not consented prior to birth, after 5 minutes of life and before 2 hours of life, postnatal consent may be obtained for any eligible infant admitted to the NICU and must be randomized and receive treatment prior to their two hours of age. Randomization will be stratified by gestational age (24-26+6 weeks and 27+0-29+6 weeks) and labeled as such on each envelope. Multiples will be randomized to the same treatment group for ease of consent and family considerations.

### ETHICS AND DISSEMINATION:

IRB approval has been obtained by the Sharp Healthcare Ethics Board. The study will take over 5 years to conduct. This will include (3 months of startup, 2.5 years to enrollment subject goal. At 24 months CGA,

1  
2  
3 a neurodevelopmental outcome assessment using the standardized neurological and developmental  
4 [Bayley Scales of Infant Development (BSID), 4<sup>th</sup>ed] will be performed and finally 3 months for data  
5 analysis and publication of results).  
6  
7

8  
9 Results should be available by 2025. We will track and follow several exploratory outcomes and results  
10 presented at a major meeting and published in a major neonatal journal. This study is registered on  
11  
12 [www.ClinicalTrials.gov](http://www.ClinicalTrials.gov), number NCT#04209946.  
13  
14

### 15 16 17 18 **ARTICLE SUMMARY: STRENGTHS AND LIMITATIONS OF THIS STUDY:**

- 19  
20 • This is the first US study of LISA in extremely preterm infants
- 21  
22 • This will be the first LISA trial to prescribe and mandate caffeine use with the LISA  
23 procedure  
24  
25
- 26  
27 • Limitations include a small sample size and limited neonatal centers.  
28  
29

### 30 31 32 **INTRODUCTION:**

33  
34 Delivery room resuscitation of the very preterm infant has evolved dramatically over the past decades.  
35  
36 Optimizing the care of these newborns now involves a variation of early continuous positive airway  
37 pressure (CPAP) and the avoidance of mechanical ventilation. A recent meta-analysis of non-invasive  
38 ventilation strategies demonstrated that Less invasive surfactant administration (LISA) had the lowest odd  
39 ratio (OR, 0.49; 95% CI 0.3-0.79) for the development of the composite outcome of death or  
40 bronchopulmonary dysplasia (BPD) amongst non-invasive strategies compared to mechanical ventilation.  
41  
42

43  
44  
45  
46 <sup>1</sup> Despite these results and studies showing it decreased the need for mechanical ventilation compared to  
47 CPAP,<sup>2,3</sup> the use of the LISA method is still not widely accepted<sup>4</sup>. We will conduct a randomized,  
48 multicenter trial to test whether infants that receive surfactant via the LISA method compared to early  
49 CPAP and positive pressure ventilation have a decreased need for mechanical ventilation in the first 72  
50 hours of life. We will track and follow several exploratory outcomes and results presented at a major  
51  
52  
53  
54  
55  
56  
57

meeting and published in a major neonatal journal. This study is registered on [www.ClinicalTrials.gov](http://www.ClinicalTrials.gov), number NCT#04209946.

The study will take over 5 years to conduct. This will include (3 months of startup, 2.5 years to enrollment subject goal. At 24 months CGA, a neurodevelopmental outcome assessment using the standardized neurological and developmental [Bayley Scales of Infant Development (BSID), 4<sup>th</sup>ed] will be performed and finally 3 months for data analysis and publication of results). This will be the first US led multicenter trial on Less Invasive Surfactant Administration in infants born under 30 weeks gestational age.

### **SPECIFIC AIMS:**

To determine whether prophylactic administration of surfactant by the LISA method reduces the need for mechanical ventilation in the first 72 hours of life when compared to early CPAP alone.

#### Hypothesis 1:

Infants in the LISA group will have decreased need for mechanical ventilation compared to infants in the early CPAP group.

#### Primary Outcome:

Frequency of subjects requiring endotracheal intubation between the two groups (LISA vs CPAP) in the first 72 hours of life

#### Secondary Outcomes:

Duration of mechanical ventilation and/or CPAP

Requirement of supplemental oxygen at 36 weeks corrected age

Grade III and IV intraventricular hemorrhage

Neurodevelopment outcome at 24 months corrected gestational age

Need for repeat surfactant dosing

Incidence of intubation with NIMV as primary mode of non-invasive ventilation

Incidence of intubation with CPAP as primary mode of non-invasive ventilation

1  
2  
3 Exploratory outcomes:  
4

5 Laryngoscopy attempt with the LISA procedure  
6

7 Laryngoscopy attempt with the endotracheal intubation  
8  
9

10  
11 Study Timeframe: From birth through 2 years of age.  
12  
13

14  
15  
16 Cost to Subjects: None  
17  
18

19  
20 The secondary objective for this study is to assess neurodevelopmental outcome at 24 months corrected  
21 gestational age (CGA). The assessment tools to measure neurodevelopmental outcome will be the Bayley  
22 Scales of Infant and Toddler Development 4th ed. (BSID-4), a standardized neurologic exam, and  
23  
24 neurosensory assessment of vision and hearing as reported by parents including:  
25  
26  
27

- 28
- 29 • Neurodevelopmental Impairment (Mild/Moderate-Severe)
  - 30 • Gross motor function: assessed by the Gross Motor Function Classification System
  - 31 • Cerebral Palsy (mild, moderate, severe)
  - 32 • Differences in 2 year developmental outcomes as assessed by Cognitive, Language & Motor
- 33  
34  
35

36 Composite scores of Bayley Scales of Infant Development in infants born at 24-29+6 weeks  
37  
38  
39  
40

41 **METHODS AND ANALYSIS:**  
42

43 The Caffeine and Less Invasive Surfactant Administration (CaLI) trial is a multicenter, randomized study  
44 done at 2 neonatal intensive care units with Level III designations in California, USA and is expected to  
45  
46 be conducted between January 2020 and January 2025. Consented premature infants with gestational age  
47  
48 from 24 weeks to 29 weeks plus 6 days will be enrolled within 2 hours of life. For infants not consented  
49  
50 prior to birth, postnatal consent may be obtained after 5 minutes of life and before 2 hours of life for any  
51  
52  
53  
54  
55  
56  
57



1  
2  
3 eligible infant admitted to the NICU. Subjects must be randomized and receive treatment prior to two  
4  
5 hours of life.

6  
7 **Inclusion Criteria:**

- 8  
9
- 10 • Premature infants born at 24-29+6 weeks gestation
  - 11 • Informed consent obtained (antenatal/postnatal)
  - 12 • Infant is spontaneously breathing and maintains normal heart rate (HR>100 Bpm)
- 13  
14  
15

16  
17 **Exclusion Criteria:**

- 18  
19
- 20 • Declined consent
  - 21 • Infants with known congenital anomalies
  - 22 • Requiring intubation prior to randomization
- 23  
24  
25

26 All infants found to have anomalies post-randomization will be analyzed by intent to treat principle.

27  
28  
29 **Randomization:**

30 Only spontaneously breathing infants maintaining normal heart rate and saturations will be included.

31  
32 After 5 minutes of life, consented infants that are assessed by a provider as clinically stable (i.e. HR >100  
33 bpm) and spontaneously breathing on CPAP will be randomized by computer generated randomization  
34 cards placed in opaque envelopes. For infants not consented prior to birth, after 5 minutes of life and  
35 before 2 hours of life, postnatal consent may be obtained for any eligible infant admitted to the NICU and  
36 must be randomized and receive treatment prior to their two hours of age. When the neonatal provider  
37 assesses the infant to be stable, a member of the research or neonatal team will pull a randomization card  
38 according to the infant's corrected gestational age. Once the treatment group is identified (LISA or  
39 CPAP), therapy will immediately commence. Randomization is stratified by gestational age (24-26+6  
40 weeks and 27+0-29+6 weeks) and is labeled as such on each envelope. Multiples will be randomized to  
41 the same treatment group for ease of consent and family considerations.

42  
43  
44  
45  
46  
47  
48  
49  
50  
51  
52  
53  
54  
55  
56  
57

**Blinding:**

The capacity to be blinded for this study is not feasible, since the providers caring for the patient are providing the intervention.

**Study Design:**

One hundred and fifty (150) premature infants born at GA of 24-29+6 weeks CGA will be enrolled at two centers. Infants will be allowed to transition and stabilize on CPAP (at 5-6 cm of water) and/or mask positive pressure ventilation (starting at PIP 20 and PEEP 5) in the delivery room. Once they are breathing spontaneously, have a stable heart rate (i.e. >100 Bpm), and assessed to be clinically stable by a neonatal provider, they will be randomized to either the LISA group or CPAP group.

Randomized infants in both groups will only be intubated if they meet strict failure criteria (see study design) to avoid bias in an un-blinded study. Any repeat dosing for surfactant will be based on clinical indication at the physicians' discretion by the conventional endotracheal approach. Both units routinely give caffeine immediately after birth.

**LISA Group:**

For infants randomized to LISA, we will have an orogastric tube placed into the stomach prior to laryngoscopy and the contents aspirated before and after the procedure to document any esophageal surfactant administration. Then a thin catheter (16G angiocatheter) will be measured and the depth of insertion will be marked with intubation tape. The thin catheter will then be placed in the trachea under direct visualization with a laryngoscope by a neonatal practitioner. After the catheter is placed, the laryngoscope will be removed and the infant's mouth will be closed. Surfactant (Curosurf 2.5 mL/kg, based on estimated fetal weight) will be slowly administered over 1-2 minutes (approximately in 3 aliquots) assuring synchronized instillation with infant's breathing pattern while on nasal CPAP. After instillation, the catheter will be immediately removed and nCPAP will continue. If apnea occurs during or

1  
2  
3 after the procedure, positive pressure ventilation will be given. All sites have agreed on using senior level  
4  
5 physicians or practitioners that have prior experience with the LISA method.  
6  
7

### 8 9 **CPAP Group:**

10  
11 Infants randomized to early CPAP will be managed according to unit practice for preterm infants on  
12  
13 CPAP. Premature infants may require CPAP immediately after delivery if they elicit signs of labored  
14  
15 breathing or unable to maintain oxygen saturations within neonatal resuscitation goals despite 100%  
16  
17 oxygen supplementation. If randomized to the CPAP group, infant will continue on CPAP unless infant  
18  
19 meets failure criteria and requires intubation.  
20  
21

### 22 23 **Caffeine:**

24  
25 If randomized to LISA, caffeine will be given prior to the LISA procedure. In contrast, if randomized to  
26  
27 CPAP, caffeine will be given soon after birth. If infants in the CPAP group meet intubation criteria, and  
28  
29 the loading dose of caffeine has not been administered, to avoid any delay in intubation, Caffeine will be  
30  
31 given no later than thirty minutes of intubation.  
32  
33

34  
35 Randomized infants in both groups will only be intubated if they meet strict failure criteria (see study  
36  
37 design) to avoid bias in an un-blinded study. Any repeat dosing for surfactant will be based on clinical  
38  
39 indication at the physician discretion by the conventional endotracheal approach. Both units routinely  
40  
41 give caffeine immediately after birth.  
42  
43

### 44 45 **Intubation criteria once randomized:**

46  
47 As an un-blinded trial it is critical that both groups are standardized to avoid bias towards one arm for  
48  
49 mechanical ventilation/treatment failure. Therefore, strict delivery room/ NICU criteria will be used.  
50  
51  
52  
53  
54  
55  
56  
57

1  
2  
3 **Delivery room** - Criteria for intubation will be as specified in the Neonatal Resuscitation Program  
4 guidelines <sup>6</sup> and will include: **1)** when chest compressions are needed; **2)** ineffective ventilation; **3)**  
5 prolonged PPV; or **4)** prolonged hypoxia. Infants intubated before randomization will be excluded to  
6 avoid any early selection bias.  
7  
8  
9

10  
11  
12  
13 **NICU** - Criteria for intubation/treatment failure will be recent guidelines for the management of RDS<sup>7</sup>,  
14 including: 1)  $\text{FiO}_2 > 0.40$  required to maintain  $\text{Sat} > 90\%$  for 2 hour after randomization; 2) a pH of 7.15 or  
15 less OR a  $\text{paCO}_2 > 65$  mmHg on any (2) blood gases (arterial/capillary/or venous) at least 2 hours after  
16 randomization in the first 72 hours of life. To avoid the bias of withheld ventilation since the study is not  
17 masked, infants with these criteria will be regarded as treatment failures.  
18  
19

20 For pragmatic purpose sites will be able to use their standard approach for non-invasive ventilation  
21 (NCPAP at SMB and NIMV at LLU) as they have agreed to use each mode equally regardless of  
22 randomization. Subsequent analysis will include primary mode of non-invasive ventilation.  
23  
24  
25

### 26 **Statistics/Plans for Analysis:**

27 We will describe / compare baseline demographics, clinical outcome variables between the two groups  
28 using univariate and appropriate bivariate analysis. We will use generalized linear models (GLM)  
29 (stratified by center and adjusting for a priori and posteriori variables) to evaluate clinical outcome  
30 variables. Appropriate repeated measures GLM models and correlation analysis will be performed to  
31 identify trends and relationships among the various hemodynamic parameters.  
32  
33  
34

### 35 **Statistical Analysis plan including sample size and power:**

36 A chart review of the databases at Sharp Mary Birch has shown that approximately 49% of our infants 24-  
37 29+6 weeks' gestation were intubated and mechanically ventilated after 5 minutes of life but within the  
38 first 72 hours of life. Therefore, a very conservative sample size calculation indicates that in order to detect  
39  
40  
41  
42  
43  
44  
45  
46  
47  
48

1  
2  
3 a 22% absolute reduction (a reduction from 49% to 27%) we would need at least 150 subjects' enrolled (75  
4 subjects in each arm) for an 80% power and a p-value of less than 0.05 for significance.  
5  
6  
7

### 8 9 **Data Collection:**

10 Data will be collected and managed using REDCap electronic data capture tools hosted at Sharp Mary  
11 Birch Hospital for Women Newborns and managed by the lead site. All collected variables are listed in  
12 the CRF forms (see attached). Both Loma Linda University Medical Center and Sharp Mary Birch  
13 Hospital for Women & Newborns have extensive experience with REDCap data entry.  
14  
15  
16  
17  
18  
19  
20  
21

### 22 **Human Subjects Protections:**

23 The study interventions, Less Invasive Surfactant Administration (LISA) and Continuous Positive Airway  
24 Pressure (CPAP), are two different methods that we hope will support our specific aim in reducing  
25 mechanical ventilation within the first 72 hours of life for preterm infants. Both groups will receive the  
26 same surfactant, however, the LISA group will use a smaller catheter compared to an endotracheal tube to  
27 instill it into the trachea. The small catheter would allow infants to breath on their own while receiving  
28 surfactant and CPAP by nasal cannula compared to the endotracheal tube method that requires placing the  
29 infant on mechanical ventilation. The LISA method is currently used by our group, a number of hospitals  
30 in California and Florida but no US trials have been conducted to date. Only infants who are stable after 5  
31 minutes of life (breathing on their own with normal oxygen and heart rate levels) would be included.  
32  
33  
34  
35  
36  
37  
38  
39  
40  
41  
42  
43

44 Prior to any research procedure, consent will be obtained by the primary investigator or a delegated sub-  
45 investigator or a research associate. The mother, or legally authorized representative must sign the informed  
46 consent document. Mother (or surrogate mother) must sign a HIPAA authorization providing access to her  
47 medical records for collection of maternal data. Either mother or father or legal guardian can sign a HIPAA  
48 authorization providing access to the child's medical records for data collection purposes. The subject's legally  
49 authorized representatives will be given ample time to read the informed consent, ask questions of the research  
50  
51  
52  
53  
54  
55  
56  
57

1  
2  
3 team, and discuss the study with their family and/or the subject's physician. The informed consent process will  
4  
5 be documented in the electronic medical record and copies of the signed and dated consent will be given to the  
6  
7 subject's representatives, placed in the subject's physical chart, and stored in a locked cabinet in the offices of  
8  
9 the Neonatal Research Institute.  
10

11  
12 Pregnant women will be identified and screened from the labor and delivery floor or perinatal special care  
13  
14 unit at each site. Parents will be approached and consented prior to delivery. In the delivery room, after the  
15  
16 infant's five minutes of life, the research staff or neonatal delivery team will open the randomization  
17  
18 envelope for the proper GA group. Multiples will be randomized to the same treatment group for ease of  
19  
20 consent and family considerations. There is no crossover allowed between the LISA and CPAP groups,  
21  
22 subjects should receive their randomized treatment. If the physician determines that the infant requires  
23  
24 intubation or is determined to be unstable within five minutes of life, the infant will be intubated and  
25  
26 excluded from the study.  
27  
28  
29  
30  
31

### 32 **Patient and public involvement:**

34  
35 We have collaborated with parents by presenting this study to the Sharp Mary Birch Parent Advisory Board.  
36  
37 We have incorporated their suggestions and they enthusiastically support the study. One of the parents has  
38  
39 agreed to be on the DSMB to monitor the trial for safety.  
40  
41  
42  
43  
44

### 45 **Risks:**

46  
47  
48 Loss of confidentiality: All data will be safeguarded in accordance with the Health Insurance Portability  
49  
50 and Accountability Act (HIPAA) and the principles and practices of strict confidentiality. Data will be  
51  
52 maintained by numerical code rather than personal identifiers and computer-based files will be available  
53  
54  
55  
56  
57

1  
2  
3 only to persons involved in the study through the use of access privileges and passwords. However, there  
4  
5 is still a potential risk of loss of data and privacy.  
6  
7

8 As with any study, there may be risks that currently are unforeseeable.  
9  
10

### 11 12 13 **Protection against Risk:** 14

15  
16 Practitioners at all sites have experience with performing LISA or CPAP with endotracheal intubation  
17  
18 within their normal clinical care. Only research team members (with appropriate research training  
19  
20 relevant to protection of human subjects) shall have access to the project's databases.  
21  
22  
23  
24  
25

### 26 **DATA AND SAFETY MONITORING PLAN** 27

28 We have chosen an experience and well recognized data safety monitoring board (DSMB) with  
29  
30 experience with respiratory trials. Drs. Brad Yoder and Wally Carlo have led and participated in a number  
31  
32 of trials including High-Flow Nasal Cannula, High Frequency Ventilation, and surfactant. In addition, a  
33  
34 former parent that has participated in research trials Kirsten Norman has agreed to serve on the DSMB.  
35  
36 The DSMB will: 1) protect all study patients, 2) safeguard the interests of all study patients, 3) monitor  
37  
38 the overall conduct of the trial, 4) advise the investigators in order to protect the integrity of the trial, and  
39  
40 5) supervise the conduct and analysis of all interim analyses. To this end, the DSMB will receive regular  
41  
42 reports from the trial on any injuries or adverse events, any developments that jeopardize the continued  
43  
44 success of the trial, and data by which to accomplish the evaluation of predetermined early stopping rules.  
45  
46 All SAEs, protocol deviations, non-serious adverse events (AEs), and unanticipated problems (UPs) will  
47  
48 be reported to the Data Coordinating Center (DCC) and forwarded to the DSMB if indicated (see below);  
49  
50 reports of adverse events and recruitment will be sent monthly; demographics will be included with the  
51  
52 interim and final safety and efficacy analyses. Interim analyses determined by the DSMB and the project  
53  
54  
55  
56  
57

1  
2  
3 statistician will be conducted, independently from the trial leadership and staff. The definitions and  
4  
5 reporting process are as follows:  
6  
7

8  
9 Serious Adverse Events defined as one or more of the following: decompensation during the  
10  
11 administration of surfactant in either arm including the use of epinephrine in the delivery room and chest  
12  
13 compressions, or death prior to discharge.  
14

- 15  
16 1. All SAEs will be reported within 72 hours of discovery of event, to the PI and the IRB at the  
17  
18 Sharp Data center.
- 19  
20 2. Any Unexpected AE or Serious Deviation will be reported within 7 days of discovery of event to  
21  
22 the Sharp Data Center.  
23  
24  
25

#### 26 Not Serious Events

27  
28 Unexpected events that are Not Serious are reported not more than 14 days after the PI first learns of the  
29  
30 event. The DCC will forward all not-serious unexpected events to the DSMB, and PI. All other expected  
31  
32 outcomes of prematurity, i.e. BPD, IVH grades 1-4, ROP, NEC will be collected in the electronic  
33  
34 database and reviewed in interim reports, see attached CRF. We have appointed a DSMB to work closely  
35  
36 with the PI and the IRB. There are no conflicts of interest with these individuals, who are not research  
37  
38 collaborators of, and are at separate institutions from the investigators at the enrolling sites.  
39  
40

41 The study will be closely monitored for issues of data quality, study conduct, and adverse events. These  
42  
43 analyses will be presented to the DSMB. Interim analyses will seek to identify results that are sufficiently  
44  
45 extreme and precise to offset the goal of obtaining additional data that might lead to more precise, and  
46  
47 perhaps less exaggerated and more convincing results, as well as information about differences in  
48  
49 treatment effect by subgroups of patients. Determinations on stopping must reflect ethical considerations  
50  
51 of the impact of interim results on clinical equipoise as well as considerations on the potential impact (or  
52  
53 lack of impact) of interim results on clinical practice. The superiority must be tested in the context of this  
54  
55  
56  
57



1  
2  
3 trial first and then superiority assessed, unless the DSMB is ethically motivated to stop the trial for  
4  
5 superiority.  
6  
7  
8

9  
10 **Specific Drug Supply requirements:**

11 The surfactant given to these infants is provided at no cost to the patients in both arms of the trial. The  
12  
13 average dose of Curosurf is 2.5 mL/kg. Assuming an average weight of 1 kg (for 28 weeks as our mean  
14  
15 gestational age) x 150 participants would be 375 mL of Curosurf.  
16  
17  
18  
19

20  
21 **Figure 1. Flowsheet of study procedure**  
22  
23  
24

25 **Contributorship Statement: FI and AK developed the initial protocol and manuscript. SH, KC, AH,**  
26  
27 **AB, NF, WR helped revise the manuscript and protocol. AM and JS helped develop the dataset and**  
28  
29 **variables for the manuscript.**  
30  
31  
32

33 **COMPETING INTERESTS:**  
34

35 The authors declare that they have no competing interests.  
36  
37  
38  
39

40 **Abbreviations (in alphabetical order)**

41 BPD = Bronchopulmonary Dysplasia (supplemental O<sub>2</sub> at 36 weeks CGA)  
42  
43

44 Bpm = beats per minute  
45

46 BSID-4= Bayley Scales of Infant and Toddler Development 4<sup>th</sup> ed  
47

48 CPAP = Continuous Positive Airway Pressure  
49

50 LISA = Less Invasive Surfactant Administration  
51

52 nCPAP = Nasal Continuous Positive Airway Pressure  
53

54 NICU=Neonatal Intensive Care Unit  
55  
56  
57

1  
2  
3 NIMV = Nasal Intermittent Minute Ventilation  
4

5 PPV = positive pressure ventilation with bag & mask  
6

7 RDS= Respiratory Distress Syndrome  
8  
9

10  
11 **FUNDING:**  
12

13 A grant for the CaLI trial has been obtained from Chiesi Farmaceutici, S.p.A  
14  
15

16  
17 **PRINCIPAL INVESTIGATOR**  
18

19 Anup Katheria MD, Sharp Mary Birch Hospital for Women & Newborns, San Diego, CA, USA  
20

21 Shandee Hutson MD, Sharp Mary Birch Hospital for Women & Newborns, San Diego, CA, USA  
22

23 Andrew Hopper, MD, Loma Linda University Medical Center, Loma Linda, CA, USA  
24

25 Anamika Banerji, MD, Loma Linda University Medical Center, Loma Linda, CA, USA  
26

27 Neil Finer MD, Sharp Mary Birch Hospital for Women & Newborns, San Diego, CA, USA  
28  
29

30  
31 **Statistician**  
32

33 Debra Poeltler, PhD, Sharp Mary Birch Hospital for Women & Newborns, San Diego, CA, USA  
34  
35  
36  
37  
38  
39  
40  
41  
42  
43  
44  
45  
46  
47  
48  
49  
50  
51  
52  
53  
54  
55  
56  
57

## REFERENCES

1. Isayama T, Iwami H, McDonald S, Beyene J. Association of Noninvasive Ventilation Strategies With Mortality and Bronchopulmonary Dysplasia Among Preterm Infants: A Systematic Review and Meta-analysis. *Jama* 2016;316:611-24.
2. Gopel W, Kribs A, Ziegler A, et al. Avoidance of mechanical ventilation by surfactant treatment of spontaneously breathing preterm infants (AMV): an open-label, randomised, controlled trial. *Lancet* 2011;378:1627-34.
3. Kribs A, Hartel C, Kattner E, et al. Surfactant without intubation in preterm infants with respiratory distress: first multi-center data. *Klin Padiatr* 2010;222:13-7.
4. Bhayat S, Kaur A, Premadeva I, Reynolds P, Gowda H. Survey of less Invasive Surfactant Administration in England, slow adoption and variable practice. *Acta Paediatr* 2019.
5. Finer NN, Carlo WA, Walsh MC, et al. Early CPAP versus surfactant in extremely preterm infants. *The New England journal of medicine* 2010;362:1970-9.
6. Braner D, Denson S, Zaichkin J, American Heart Association., American Academy of Pediatrics. Committee on Fetus and Newborn. *Textbook of neonatal resuscitation*. Dallas, TX: American Heart Association; 2000.
7. Sweet DG, Carnielli V, Greisen G, et al. European Consensus Guidelines on the Management of Respiratory Distress Syndrome - 2016 Update. *Neonatology* 2017;111:107-25.

1  
2  
3  
4  
5  
6  
7  
8  
9  
10  
11  
12  
13  
14  
15  
16  
17  
18  
19  
20  
21  
22  
23  
24  
25  
26  
27  
28  
29  
30  
31  
32  
33  
34  
35  
36  
37  
38  
39  
40  
41  
42  
43  
44  
45  
46  
47  
48  
49  
50  
51  
52  
53  
54  
55  
56  
57  
58  
59  
60

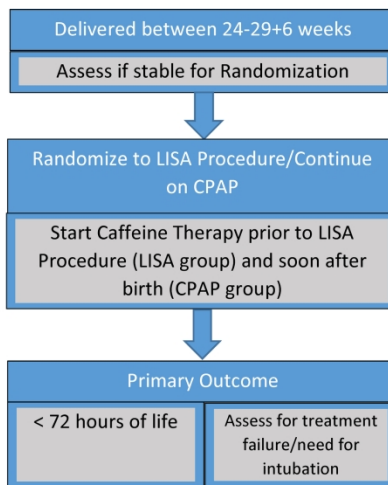

Figure 1. Flowsheet of study procedure

215x279mm (300 x 300 DPI)

# BMJ Open

## A Multicenter, Randomized Trial of Preterm Infants receiving Caffeine and Less Invasive Surfactant Administration Compared to Caffeine and Early Continuous Positive Airway Pressure (CaLI Trial): Study Protocol

|                                 |                                                                                                                                                                                                                                                                                                                                                                                                                                                                                                                                                                                                                                                                                                                                                  |
|---------------------------------|--------------------------------------------------------------------------------------------------------------------------------------------------------------------------------------------------------------------------------------------------------------------------------------------------------------------------------------------------------------------------------------------------------------------------------------------------------------------------------------------------------------------------------------------------------------------------------------------------------------------------------------------------------------------------------------------------------------------------------------------------|
| Journal:                        | <i>BMJ Open</i>                                                                                                                                                                                                                                                                                                                                                                                                                                                                                                                                                                                                                                                                                                                                  |
| Manuscript ID                   | bmjopen-2020-038343.R1                                                                                                                                                                                                                                                                                                                                                                                                                                                                                                                                                                                                                                                                                                                           |
| Article Type:                   | Protocol                                                                                                                                                                                                                                                                                                                                                                                                                                                                                                                                                                                                                                                                                                                                         |
| Date Submitted by the Author:   | 06-Aug-2020                                                                                                                                                                                                                                                                                                                                                                                                                                                                                                                                                                                                                                                                                                                                      |
| Complete List of Authors:       | Ines, Felix; Sharp Mary Birch Hospital for Women and Newborns, Neonatal Research Institute<br>Hutson, Shandee; Sharp Mary Birch Hospital for Women and Newborns<br>Coughlin, Katherine; Sharp Mary Birch Hospital for Women and Newborns<br>Hopper, Andrew; Loma Linda University Medical Center<br>Banerji, Anamika; Loma Linda University Medical Center<br>Uy, Cherry; University of California Irvine<br>Finer, Neil; University of California San Diego<br>Rich, Wade; Sharp Mary Birch Hospital for Women and Newborns<br>Morales, Ana; Sharp Mary Birch Hospital for Women and Newborns<br>Steen, Jane; Sharp Mary Birch Hospital for Women and Newborns<br>Katheria, Anup; Sharp Mary Birch Hospital for Women and Newborns, Neonatology |
| <b>Primary Subject Heading</b>: | Paediatrics                                                                                                                                                                                                                                                                                                                                                                                                                                                                                                                                                                                                                                                                                                                                      |
| Secondary Subject Heading:      | Paediatrics                                                                                                                                                                                                                                                                                                                                                                                                                                                                                                                                                                                                                                                                                                                                      |
| Keywords:                       | Neonatal intensive & critical care < INTENSIVE & CRITICAL CARE, NEONATOLOGY, RESPIRATORY MEDICINE (see Thoracic Medicine)                                                                                                                                                                                                                                                                                                                                                                                                                                                                                                                                                                                                                        |
|                                 |                                                                                                                                                                                                                                                                                                                                                                                                                                                                                                                                                                                                                                                                                                                                                  |

SCHOLARONE™  
Manuscripts



I, the Submitting Author has the right to grant and does grant on behalf of all authors of the Work (as defined in the below author licence), an exclusive licence and/or a non-exclusive licence for contributions from authors who are: i) UK Crown employees; ii) where BMJ has agreed a CC-BY licence shall apply, and/or iii) in accordance with the terms applicable for US Federal Government officers or employees acting as part of their official duties; on a worldwide, perpetual, irrevocable, royalty-free basis to BMJ Publishing Group Ltd ("BMJ") its licensees and where the relevant Journal is co-owned by BMJ to the co-owners of the Journal, to publish the Work in this journal and any other BMJ products and to exploit all rights, as set out in our [licence](#).

The Submitting Author accepts and understands that any supply made under these terms is made by BMJ to the Submitting Author unless you are acting as an employee on behalf of your employer or a postgraduate student of an affiliated institution which is paying any applicable article publishing charge ("APC") for Open Access articles. Where the Submitting Author wishes to make the Work available on an Open Access basis (and intends to pay the relevant APC), the terms of reuse of such Open Access shall be governed by a Creative Commons licence – details of these licences and which [Creative Commons](#) licence will apply to this Work are set out in our licence referred to above.

Other than as permitted in any relevant BMJ Author's Self Archiving Policies, I confirm this Work has not been accepted for publication elsewhere, is not being considered for publication elsewhere and does not duplicate material already published. I confirm all authors consent to publication of this Work and authorise the granting of this licence.

1  
2  
3 **A Multicenter, Randomized Trial of Preterm Infants receiving Caffeine and Less Invasive**  
4 **Surfactant Administration Compared to Caffeine and Early Continuous Positive Airway**  
5 **Pressure (CaLI Trial): Study Protocol**  
6  
7  
8

9  
10 Felix Ines, Shandee Hutson, Katherine Coughlin, Andrew Hopper, Anamika Banerji, Cherry Uy,  
11  
12 Neil Finer, Wade Rich, Ana Morales, Jane Steen, Anup Katheria\*  
13

14  
15  
16 Neonatal Research Institute, Sharp Mary Birch Hospital for Women & Newborns, San Diego,  
17  
18 CA, United States.  
19

20  
21  
22  
23 Loma Linda University Medical Center, Loma Linda, CA, United States.  
24

25  
26  
27  
28 University of California Irvine Medical Center, Irvine, CA, United States.  
29

30  
31  
32 Corresponding author: Anup Katheria M.D., Neonatal Research Institute, Sharp Mary Birch  
33  
34 Hospital for Women & Newborns, San Diego, CA, United States. Email:  
35  
36  
37 Anup.Katheria@sharp.com  
38  
39  
40  
41  
42  
43  
44  
45  
46  
47  
48  
49  
50  
51  
52  
53  
54  
55  
56  
57

## ABSTRACT

**Introduction:** A recent meta-analysis of non-invasive ventilation strategies demonstrated that Less Invasive Surfactant Administration (LISA) had the lowest odd ratio (OR, 0.49; 95% CI 0.3-0.79) for the development of the composite outcome of death or bronchopulmonary dysplasia (BPD) amongst non-invasive ventilation strategies compared to invasive mechanical ventilation.

Despite these results and studies showing it decreased the need for invasive mechanical ventilation compared to Continuous Positive Airway Pressure (CPAP), the use of the LISA method is not universally accepted, however, has found wide acceptance in Europe.

**Methods and Analysis:** Consented premature infants with gestational age from 24 weeks to 29 weeks plus 6 days will be enrolled within 2 hours of life. Caffeine will be administered prior to administration of surfactant in the LISA group or before 2 hours of life in the control arm.

**Ethics and Dissemination:** Ethics approval has been obtained. Results will be published and presented at the Pediatric Academic Societies meeting upon completion.

**Clinical Trial Registration:** [www.Clinicaltrials.gov](http://www.Clinicaltrials.gov): NCT04209946

**Protocol version 1.2P, 21Jul2020**

### STRENGTHS AND LIMITATIONS OF THIS TRIAL ARE:

- Limited to power for longer term outcomes such as BPD and neurodevelopmental impairment due its smaller size
- Pragmatic in design and does not include blinding
- The first to be prescriptive in the use of caffeine as a co-intervention for LISA administration to test its benefit
- This study will be the most recent in many years to re-study the use of prophylactic surfactant with the LISA method compared to expectant management with CPAP alone.



## INTRODUCTION

Advances in the management of the extremely preterm neonates (24+0 weeks to 29+6 weeks) with neonatal respiratory distress syndrome (RDS) has evolved dramatically over the past decades. Interventions to improve outcome and minimize RDS begins with good prenatal care. However, premature delivery may be inevitable, therefore, delivery room management has become an integral part in optimizing the care of these newborns. Specifically, with lung protection in mind, management involves a variation of antenatal steroids, early continuous positive airway pressure (CPAP), early administration of caffeine, early administration of surfactant therapy and the avoidance of invasive mechanical ventilation. The adaptation of various management strategies of RDS continue to evolve due to sustained severe morbidity, including bronchopulmonary dysplasia.

Initial respiratory management includes, early initiation of continuous positive airway pressure (CPAP) and titration of  $\text{FiO}_2$ <sup>1</sup>, modifications in the administration of surfactant therapy using less invasive techniques, and the avoidance of mechanical ventilation<sup>2</sup>. Other strategies to optimize success of non-invasive support involves the use of caffeine therapy to serve as a respiratory stimulant. Dekker et al demonstrated that the administration of caffeine in the delivery room compared to upon admission to the NICU produced greater minute ventilation and tidal volumes in premature infants <30 weeks<sup>3</sup>. The less invasive surfactant administration (LISA) to spontaneously breathing preterm infants has been reported to reduce the duration of invasive mechanical ventilation and the incidence of bronchopulmonary dysplasia.<sup>4</sup> The combination of early caffeine and LISA has not been tested. Studies have showed a decrease in need for invasive mechanical ventilation compared to CPAP,<sup>5</sup> however, the LISA method is still not universally practiced, although widely adopted in Europe.<sup>6</sup>

1  
2  
3 We will conduct a randomized, multicenter trial to test whether infants that receive caffeine,  
4 early CPAP, and surfactant via the LISA method compared to infants that receive caffeine, early  
5 CPAP and positive pressure ventilation alone, have a decreased need for invasive mechanical  
6 ventilation in the first 72 hours of life.  
7  
8  
9  
10

## 11 12 13 14 **METHODS AND ANALYSIS**

15  
16 The study will be conducted at 3 sites in the United States (Loma Linda University Medical  
17 Center, University of California, Irvine, and Sharp Mary Birch Hospital for Women &  
18 Newborns) over a 3 year period. Long term neurodevelopmental data will also be collected  
19 throughout 2 years of age. The following variables will be collected:  
20  
21  
22  
23

- 24 1. Frequency of subjects requiring endotracheal intubation between the two groups (LISA  
25 vs CPAP) in the first 72 hours of life
  - 26 2. Duration of mechanical ventilation and/or CPAP
  - 27 3. Requirement of supplemental oxygen at 36 weeks corrected age
  - 28 4. Grade III and IV intraventricular hemorrhage
  - 29 5. Spontaneous intestinal perforation
  - 30 6. Retinopathy of prematurity requiring surgery
  - 31 7. Need for repeat surfactant dosing
- 32  
33  
34  
35  
36  
37  
38  
39  
40  
41  
42  
43

44 Pregnant women will be identified and screened from the labor and delivery floor or perinatal  
45 special care unit at each site. Parents will be approached and consented prior to delivery. For  
46 infants not consented prior to birth, after the first 5 minutes of life and before 2 hours of life,  
47 postnatal consent may be obtained for any eligible infant admitted to the NICU and must be  
48 randomized and receive treatment prior to their two hours of age. In the delivery room, after the  
49 infant's first five minutes of life, the research staff or neonatal delivery team will open the  
50  
51  
52  
53  
54  
55  
56  
57

1  
2  
3 randomization envelope for the proper gestational age (GA) group. Multiples will be randomized  
4  
5 to the same treatment group for ease of consent and family considerations. There is no crossover  
6  
7 allowed between the LISA and CPAP groups, subjects should receive their randomized  
8  
9 treatment. If the physician determines that the infant requires intubation or is determined to be  
10  
11 unstable within the first five minutes of life, the infant will be intubated and excluded from the  
12  
13 study.  
14  
15

### 16 17 **Inclusion Criteria:**

- 18 • Premature infants born at 24-29+6 weeks gestational age
- 19 • Informed consent obtained (antenatal/postnatal)
- 20 • Infant is spontaneously breathing on CPAP of 5-8 cmH<sub>2</sub>O with an FiO<sub>2</sub> of <.40 and  
21  
22 maintains a normal heart rate (HR>100 Bpm)  
23  
24  
25  
26  
27  
28

### 29 **Exclusion Criteria:**

- 30 • Declined consent
- 31 • Infants with known congenital anomalies
- 32 • Requiring intubation prior to randomization  
33  
34  
35  
36  
37  
38

39 All infants found to have anomalies post-randomization will be analyzed by intent to treat  
40  
41 principle.  
42  
43

44 **Patient Allocation:** Randomization cards are computer-generated by Sharp Mary Birch Hospital  
45  
46 for Women & Newborns and will solely be known by the data manager. Each randomization  
47  
48 card contains group assignment, real-time data information, and a randomization number, sealed  
49  
50 in an opaque envelope with a label that indicates the envelope sequence number, site (facility)  
51  
52 number, and stratification by gestational age. These envelopes will be logged by the data  
53  
54 manager in a secured data file and then distributed to each research facility. We will enroll 180  
55  
56  
57

1  
2  
3 preterm infants and will stratify by gestational age (24-26+6 weeks and 27+0-29+6 weeks),  
4  
5 labeled as such on each opaque envelope.  
6  
7  
8  
9

### 10 11 **Randomization:**

12  
13 In order to allow for initial stabilization on CPAP, infants will not be randomized until at least 5  
14  
15 minutes of life. If the providers have not intubated or plan to intubate the infant in the delivery  
16  
17 room, consented infants that are assessed by a provider as clinically stable (i.e. HR >100 bpm)  
18  
19 and spontaneously breathing on CPAP (5-8 cm H<sub>2</sub>O) will be randomized. Stabilization of  
20  
21 premature infants at delivery may include stimulation, positive pressure ventilation or CPAP.  
22  
23 Multiples will be randomized to the same treatment group for ease of consent and family  
24  
25 considerations.  
26  
27

28  
29 Only spontaneously breathing infants on CPAP, maintaining normal heart rate and saturations  
30  
31 will be included and randomized. When the neonatal provider assesses the infant to be stable on  
32  
33 CPAP, a member of the research or neonatal team will pull a randomization card according to  
34  
35 the infant's corrected gestational age. Once the treatment group is identified (LISA or CPAP),  
36  
37 intervention will immediately commence.  
38  
39  
40  
41  
42

### 43 **LISA Group:**

44  
45 For infants randomized to LISA, an intravenous access will be established to administer caffeine.  
46  
47 We will have an orogastric tube placed into the stomach prior to laryngoscopy and the contents  
48  
49 aspirated before and after the procedure to document any esophageal surfactant administration.  
50  
51 Thereafter, a thin catheter (16G angiocatheter) will be measured and the depth of insertion will  
52  
53 be marked with intubation tape. The thin catheter will then be placed in the trachea under direct  
54  
55  
56  
57

1  
2  
3 or video-laryngoscopy by a neonatal practitioner. After the catheter is placed, the laryngoscope  
4  
5 will be removed, the angiocatheter held securely in place, and the infant allowed to  
6  
7 spontaneously breathe on CPAP. Surfactant (Curosurf 2.5 mL/kg, based on estimated fetal  
8  
9 weight) will be slowly administered over 1-2 minutes (approximately in 3 aliquots) assuring  
10  
11 synchronized instillation with infant's breathing pattern while on CPAP. After instillation, the  
12  
13 catheter will be immediately removed and CPAP will continue. If apnea occurs during or after  
14  
15 the procedure, positive pressure ventilation will be initiated. To improve adherence to protocol  
16  
17 interventions, all sites have agreed on using senior level physicians or neonatal practitioners that  
18  
19 have prior experience with the LISA method.  
20  
21  
22  
23  
24  
25

### 26 **CPAP Group:**

27  
28 In adherence to protocol interventions, infants randomized to early CPAP will be managed  
29  
30 according to sub-site unit practice for preterm infants on CPAP. Premature infants may require  
31  
32 CPAP immediately after delivery if they elicit signs of labored breathing or unable to maintain  
33  
34 oxygen saturations within neonatal resuscitation goals despite 100% oxygen supplementation. If  
35  
36 randomized to the CPAP group, an intravenous access will be established to administer caffeine  
37  
38 and the infant will continue on CPAP unless infant meets failure criteria and requires intubation.  
39  
40  
41  
42  
43

### 44 **Caffeine:**

45  
46 If randomized to LISA, caffeine will be given prior to the LISA procedure. In contrast, if  
47  
48 randomized to CPAP, caffeine will be given soon after birth. If infants in the CPAP group meet  
49  
50 intubation criteria, and the loading dose of caffeine has not been administered, to avoid any delay  
51  
52 in intubation, Caffeine will be given no later than thirty minutes after intubation.  
53  
54  
55  
56  
57

**Blinding:**

As a pragmatic design we realize that a separate research team would not always be able to be present for the randomization and intervention. Therefore, the clinical team caring for the infant will follow strict guidelines for intubation and management of infants to reduce any post-randomization bias (see below)

**Intubation criteria:**

As an un-blinded trial, it is critical that both groups are standardized to avoid bias towards one arm for mechanical ventilation/treatment failure. Therefore, strict delivery room/ NICU criteria will be used. Furthermore, infants cannot be randomized before 5 minutes of life to ensure that unstable infants that cannot be transitioned on CPAP would not be included. These would include infants that need intubation as specified in the Neonatal Resuscitation Program (NRP) guidelines<sup>7</sup> and such as: **1)** when chest compressions are needed; **2)** ineffective ventilation (inability to obtain good chest rise and fall despite implementation of the corrective ventilation steps: Mask adjustment; Reposition airway [try again]; Suction mouth and nose; Open mouth [try again]; Pressure increase [up to 40 cm H<sub>2</sub>O pressure]; Airway alternative; (MRSOPA), as indicated by the NRP guidelines to obtain effective ventilation); **3)** prolonged PPV (infants requiring positive pressure ventilation for more than 2 minutes in order to maintain HR >100 BpM) ; or **4)** prolonged hypoxia (pre-ductal SpO<sub>2</sub> is not met despite 100% oxygen supplements and resuscitation interventions). Randomization should be delayed until the providers are comfortable that none of these criteria are met in order to avoid any early selection bias.

After stabilization on CPAP infants can be randomized. Criteria for intubation/treatment failure will be recent guidelines for the management of RDS,<sup>1</sup> including: 1) CPAP level of 6-8 cmH<sub>2</sub>O and FiO<sub>2</sub> >0.40 required to maintain saturations 90%-95% for 2 hour after randomization; 2) a

1  
2  
3 pH of 7.15 or less or a  $\text{paCO}_2 > 65$  mmHg on any (2) blood gases (arterial/capillary/or venous) at  
4  
5 least 2 hours after randomization and in the first 72 hours of life; 3) continued  
6  
7 Apnea/Bradycardia/Desaturation events despite nasal intermittent minute ventilation (NIMV)  
8  
9 mode of ventilation. To avoid the bias of withheld ventilation since the study is not masked,  
10  
11 infants with these criteria will be regarded as treatment failures.  
12  
13

14 For pragmatic purpose sites will be able to use their standard approach for non-invasive  
15  
16 ventilation as they have agreed to use each mode (NCPAP or NIMV) equally regardless of  
17  
18 randomization. Subsequent analysis will include primary mode of non-invasive ventilation.  
19  
20  
21  
22

23 **Participant Timeline:** Figure 1. CaLI Participant Timeline (Supplemental File 1)  
24  
25  
26  
27

28 **Study Overview Diagram:** (Supplemental File 2)  
29  
30  
31  
32

### 33 **Data Management and Collection:**

34  
35 Data will be managed using REDCap electronic data capture tools hosted and managed at Sharp  
36  
37 Mary Birch Hospital for Women & Newborns. All collected variables are listed in the data report  
38  
39 form, (DRF forms): CPAP arm Delivery Room Data Collection (supplemental file 3), LISA Data  
40  
41 Collection (supplemental file 4), CaLI Intubation Data Collection (supplemental file 5). Loma  
42  
43 Linda University Medical Center, University of California Irvine Medical Center, and Sharp  
44  
45 Mary Birch Hospital for Women & Newborns have extensive experience with REDCap data  
46  
47 entry.  
48  
49  
50

51 Randomization cards are also utilized as data collection forms, with pertinent information  
52  
53 completed and signed by care providers in real-time. To maintain integrity of the study data, site  
54  
55  
56  
57

1  
2  
3 Data Coordinators will enter data information into REDCap and verified by the primary site Data  
4 coordinator and Research Coordinator prior to locking the subject's electronic data file

7 **Data and safety monitoring plan:**

9 An independent, well recognized, data safety monitoring board (DSMB) with experience with  
10 respiratory trials is chosen for this study. Drs. Brad Yoder and Wally Carlo have led and  
11 participated in a number of trials including: High-Flow Nasal Cannula, High Frequency  
12 Ventilation, and Surfactant. In addition, a former parent that has participated in research trials  
13 Kirsten Norman has agreed to serve on the DSMB. The DSMB will: 1) oversee the safety data  
14 on all study patients, 2) safeguard the interests of all study patients, 3) monitor the overall  
15 conduct of the trial, 4) advise the investigators in order to protect the integrity of the trial, and 5)  
16 supervise the conduct and analysis of all interim analyses. To this end, the DSMB will receive  
17 monthly reports from the trial on any injuries or adverse events, any developments that  
18 jeopardize the continued success of the trial, and data by which to accomplish the evaluation of  
19 predetermined early stopping rules. All SAEs, protocol deviations, non-serious adverse events  
20 (AEs), and unanticipated problems (UPs) will be reported to the Data Coordinating Center  
21 (DCC) and forwarded to the DSMB if indicated (see below). Reports of adverse events and  
22 recruitment will be sent monthly and demographics will be included with the interim and final  
23 safety and efficacy analyses. Interim analyses determined by the DSMB and the project  
24 statistician will be conducted independently from the trial leadership and staff. The definitions  
25 and reporting process are as follows:

26  
27  
28  
29  
30  
31  
32  
33  
34  
35  
36  
37  
38  
39  
40  
41  
42  
43  
44  
45  
46  
47  
48  
49  
50  
51  
52  
53  
54  
55  
56  
57  
58  
59  
60

Serious Adverse Events defined as one or more of the following: decompensation during the  
administration of surfactant in either arm including the use of epinephrine in the delivery room  
and chest compressions, or death prior to discharge.



- 1  
2  
3 1. All SAEs will be reported within 72 hours of discovery of event, to the PI and the site  
4  
5 IRB.  
6
- 7 2. Any Unexpected AE or Serious Deviation will be reported within 7 days of discovery of  
8  
9 event to the Data Coordinating Center.  
10  
11

#### 12 13 14 Non-Serious Events 15

16 Unexpected events that are Non-Serious are reported not more than 14 days after the PI first  
17  
18 learns of the event. The DCC will forward all non-serious unexpected events to the DSMB, and  
19  
20 main study PI. All other expected outcomes of prematurity, i.e. BPD, IVH grades 1-4, ROP,  
21  
22 NEC, will be collected in the electronic database and reviewed in interim reports. We have  
23  
24 appointed a DSMB to work closely with the main study PI. There are no conflicts of interest with  
25  
26 these individuals, who are not research collaborators of, and are at separate institutions from the  
27  
28 investigators at the enrolling sites.  
29  
30

31  
32 The study will be closely monitored for issues of data quality, study conduct, and adverse events.  
33  
34 These analyses will be presented to the DSMB. Interim analyses will seek to identify results that  
35  
36 are sufficiently extreme and precise, this is to offset the goal of obtaining additional data that  
37  
38 might lead to more precise and perhaps less exaggerated and more convincing results, as well as  
39  
40 information about differences in treatment effect by subgroups of patients. Determinations on  
41  
42 stopping must reflect ethical considerations of the impact of interim results on clinical equipoise  
43  
44 as well as considerations on the potential impact (or lack of impact) of interim results on clinical  
45  
46 practice. The superiority must be tested in the context of this trial first and then superiority  
47  
48 assessed, unless the DSMB is ethically motivated to stop the trial for superiority.  
49  
50  
51  
52  
53  
54

#### 55 56 **Statistical Analysis Plan:** 57

1  
2  
3 A chart review of the databases at Sharp Mary Birch has shown that approximately 49% of our  
4 infants 24-29+6 weeks' gestation were intubated and mechanically ventilated after 5 minutes of  
5 life but within the first 72 hours of life. Therefore, a very conservative sample size calculation  
6 indicates that in order to detect a 22% absolute reduction (a reduction from 49% to 27%) we  
7 would need at least 75 subjects in each arm for an 80% power and a p-value of less than 0.05 for  
8 significance. An adjustment of 1.12 derived from the NICHD Neonatal Research Network  
9 Generic Database, allowed for multiples to be randomized to the same treatment introducing a  
10 clustering effect.<sup>8</sup> In order to account for multiples and potential drop out of subjects we plan to  
11 consent 90 subjects in each arm (180 subjects total). A future detailed statistical analysis plan  
12 will be made available prior to completion of the trial.  
13  
14  
15  
16  
17  
18  
19  
20  
21  
22  
23  
24  
25  
26  
27

### 28 **Patient and Public Involvement:**

29  
30  
31 We have collaborated with parents by presenting this study to the Sharp Mary Birch Parent  
32 Advisory Board. Based on their experiences and preferences, we have incorporated their  
33 suggestions and they enthusiastically support the study. One of the parents has agreed to be on the  
34 DSMB to monitor the trial for safety. Their involvement includes input on the consent form and  
35 perspective on the means of recruitment to the study.  
36  
37  
38  
39  
40  
41  
42  
43  
44

### 45 **ETHICS AND DISSEMINATION**

46  
47  
48 Ethics approval has been obtained. Prior to any research procedure, consent will be obtained by  
49 the primary investigator or a delegated sub-investigator or a research associate. The mother, or  
50 legally authorized representative must sign the informed consent document. Mother (or surrogate  
51 mother) must sign a HIPAA authorization providing access to her medical records for collection of  
52  
53  
54  
55  
56  
57

1  
2  
3 maternal data. Either mother or father or legal guardian can sign a HIPAA authorization providing  
4  
5 access to the child's medical record for data collection purposes. The subject's legally authorized  
6  
7 representatives will be given ample time to read the informed consent, ask questions of the research  
8  
9 team, and discuss the study with their family and/or the subject's physician. The informed consent  
10  
11 process will be documented in the electronic medical record and copies of the signed and dated  
12  
13 consent will be given to the subject's representatives, placed in the subject's physical chart, and  
14  
15 stored in a locked cabinet in the offices of the Neonatal Research Institute. Results will be  
16  
17 published and presented at the Pediatric Academic Societies meeting upon completion. Any  
18  
19 important protocol modifications will be communicated to sub-site lead investigators via secured  
20  
21 email which will include automated confirmation of receipt and recorded audio/visual meetings.  
22  
23  
24  
25  
26  
27  
28

### 29 **Confidentiality:**

30  
31 All data will be safeguarded in accordance with the Health Insurance Portability and  
32  
33 Accountability Act (HIPAA) and the principles and practices of strict confidentiality. Data will  
34  
35 be maintained by numerical code rather than personal identifiers and computer-based files will  
36  
37 be available only to persons involved in the study through the use of access privileges and  
38  
39 passwords. However, there is still a potential risk of loss of data and privacy.  
40  
41  
42  
43  
44  
45  
46

### 47 **Protection against Risk:**

48  
49 Only research team members (with appropriate research training relevant to protection of human  
50  
51 subjects) shall have access to the project's databases. The final trial data set will remain with the  
52  
53 lead PI and DCC.  
54  
55  
56  
57

## CONTRIBUTORSHIP STATEMENT

**FI and AK developed the initial protocol and manuscript. SH, KC, AH, AB, CU, NF, WR helped revise the manuscript and protocol. AM and JS helped develop the dataset and variables for the manuscript. KN represents a parent adviser and is involved in the conduct of the study by means of the DSMB.**

## REFERENCES:

1. Sweet DG, Carnielli V, Greisen G, et al. European Consensus Guidelines on the Management of Respiratory Distress Syndrome - 2019 Update. *Neonatology* 2019;115(4):432-50. doi: 10.1159/000499361 [published Online First: 2019/04/12]
2. Kribs A, Roll C, Gopel W, et al. Nonintubated Surfactant Application vs Conventional Therapy in Extremely Preterm Infants: A Randomized Clinical Trial. *JAMA pediatrics* 2015;169(8):723-30. doi: 10.1001/jamapediatrics.2015.0504 [published Online First: 2015/06/09]
3. Dekker J, Hooper SB, van Vonderen JJ, et al. Caffeine to improve breathing effort of preterm infants at birth: a randomized controlled trial. *Pediatric research* 2017;82(2):290-96. doi: 10.1038/pr.2017.45 [published Online First: 2017/03/14]
4. Gopel W, Kribs A, Ziegler A, et al. Avoidance of mechanical ventilation by surfactant treatment of spontaneously breathing preterm infants (AMV): an open-label, randomised, controlled trial. *Lancet (London, England)* 2011;378(9803):1627-34. doi: 10.1016/s0140-6736(11)60986-0 [published Online First: 2011/10/04]
5. Isayama T, Iwami H, McDonald S, et al. Association of Noninvasive Ventilation Strategies With Mortality and Bronchopulmonary Dysplasia Among Preterm Infants: A Systematic Review and Meta-analysis. *JAMA : the journal of the American Medical Association* 2016;316(6):611-24. doi: 10.1001/jama.2016.10708 [published Online First: 2016/08/18]
6. Bhat S, Kaur A, Premadeva I, et al. Survey of less Invasive Surfactant Administration in England, slow adoption and variable practice. *Acta paediatrica* 2020;109(3):505-10. doi: 10.1111/apa.14995 [published Online First: 2019/09/01]
7. Braner D, Denson S, Zaichkin J, et al. Textbook of neonatal resuscitation. Dallas, TX: American Heart Association 2000.
8. Finer NN, Carlo WA, Walsh MC, et al. Early CPAP versus surfactant in extremely preterm infants. *The New England journal of medicine* 2010;362(21):1970-9. doi: 10.1056/NEJMoa0911783 [published Online First: 2010/05/18]

## FUNDING STATEMENT

1  
2  
3 A grant to support the CaLI trial has been obtained from Chiesi Farmaceutici, S.p.A and with  
4 this financial support, the primary study site maintains ultimate authority overall study activities.  
5  
6

7 **Chiesi Grant #: CRTX-GR-717**  
8  
9

## 10 11 12 **COMPETING INTERESTS**

13  
14 The Principal Investigator for the overall trial and each study site declare no financial or other  
15 competing interests.  
16  
17  
18

## 19 20 21 **APPENDIX**

### 22 23 **Figure 1. CaLI Participant Timeline**

24  
25 **Supplementary Files: Data Report Forms (DRF)**

26  
27  
28 **Study Overview Diagram (Draft)**  
29  
30

### 31 32 **Abbreviations (in alphabetical order)**

33  
34 BPD = Bronchopulmonary Dysplasia (supplemental O2 at 36 weeks CGA)

35  
36 Bpm = beats per minute

37  
38 BSID-4= Bayley Scales of Infant and Toddler Development 4<sup>th</sup> ed

39  
40 CPAP = Continuous Positive Airway Pressure

41  
42 LISA = Less Invasive Surfactant Administration

43  
44 NCPAP = Nasal Continuous Positive Airway Pressure

45  
46 NICU=Neonatal Intensive Care Unit

47  
48 NIMV = Nasal Intermittent Minute Ventilation

49  
50 PPV = positive pressure ventilation with bag & mask

51  
52 RDS= Respiratory Distress Syndrome  
53  
54  
55  
56  
57

1  
2  
3 ROP= Retinopathy of Prematurity  
4

5 SMBHWN= Sharp Mary Birch Hospital for Women & Newborns  
6

7 LLU= Loma Linda University Medical Center  
8

9 UCI= University of California Irvine Medical Center  
10  
11  
12

13  
14 **PRINCIPAL INVESTIGATORS**  
15

16 Anup Katheria MD, Sharp Mary Birch Hospital for Women & Newborns, San Diego, CA, USA  
17

18 Shandee Hutson MD, Sharp Mary Birch Hospital for Women & Newborns, San Diego, CA, USA  
19

20 Andrew Hopper, MD, Loma Linda University Medical Center, Loma Linda, CA, USA  
21

22 Anamika Banerji, MD, Loma Linda University Medical Center, Loma Linda, CA, USA  
23

24 Cherry Uy MD, University of California Irvine, Irvine, CA, USA  
25

26 Neil Finer MD, Sharp Mary Birch Hospital for Women & Newborns, San Diego, CA, USA  
27  
28  
29  
30

31 **Statistician**  
32

33 Debra Poeltler, PhD, Sharp Mary Birch Hospital for Women & Newborns, San Diego, CA, USA  
34  
35  
36  
37  
38  
39  
40  
41  
42  
43  
44  
45  
46  
47  
48  
49  
50  
51  
52  
53  
54  
55  
56  
57

1  
2  
3  
4  
5  
6  
7  
8  
9  
10  
11  
12  
13  
14  
15  
16  
17  
18  
19  
20  
21  
22  
23  
24  
25  
26  
27  
28  
29  
30  
31  
32  
33  
34  
35  
36  
37  
38  
39  
40  
41  
42  
43  
44  
45  
46  
47  
48  
49  
50  
51  
52  
53  
54  
55  
56  
57  
58  
59  
60

For peer review only  
COPY

1  
2  
3  
4  
5  
6  
7  
8  
9  
10  
11  
12  
13  
14  
15  
16  
17  
18  
19  
20  
21  
22  
23  
24  
25  
26  
27  
28  
29  
30  
31  
32  
33  
34  
35  
36  
37  
38  
39  
40  
41  
42  
43  
44  
45  
46  
47

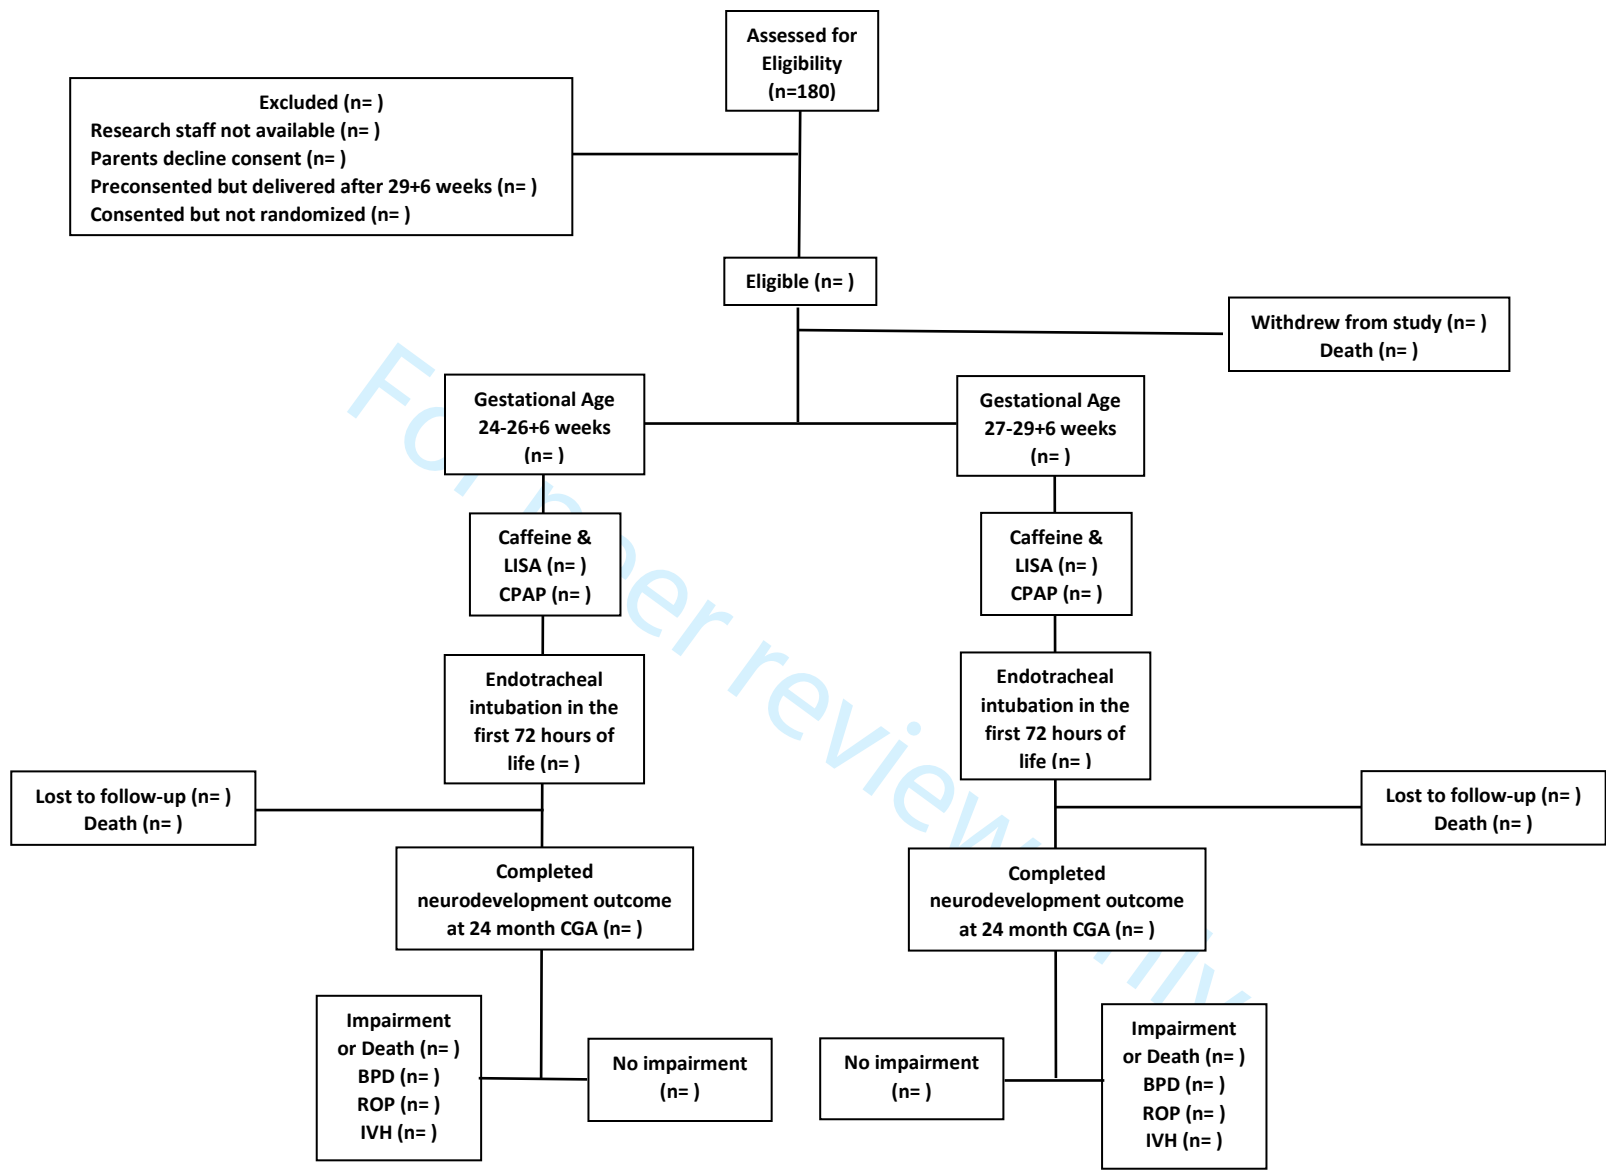

Figure 1 CaLI Participant Timeline



## CaLI Study Overview Diagram

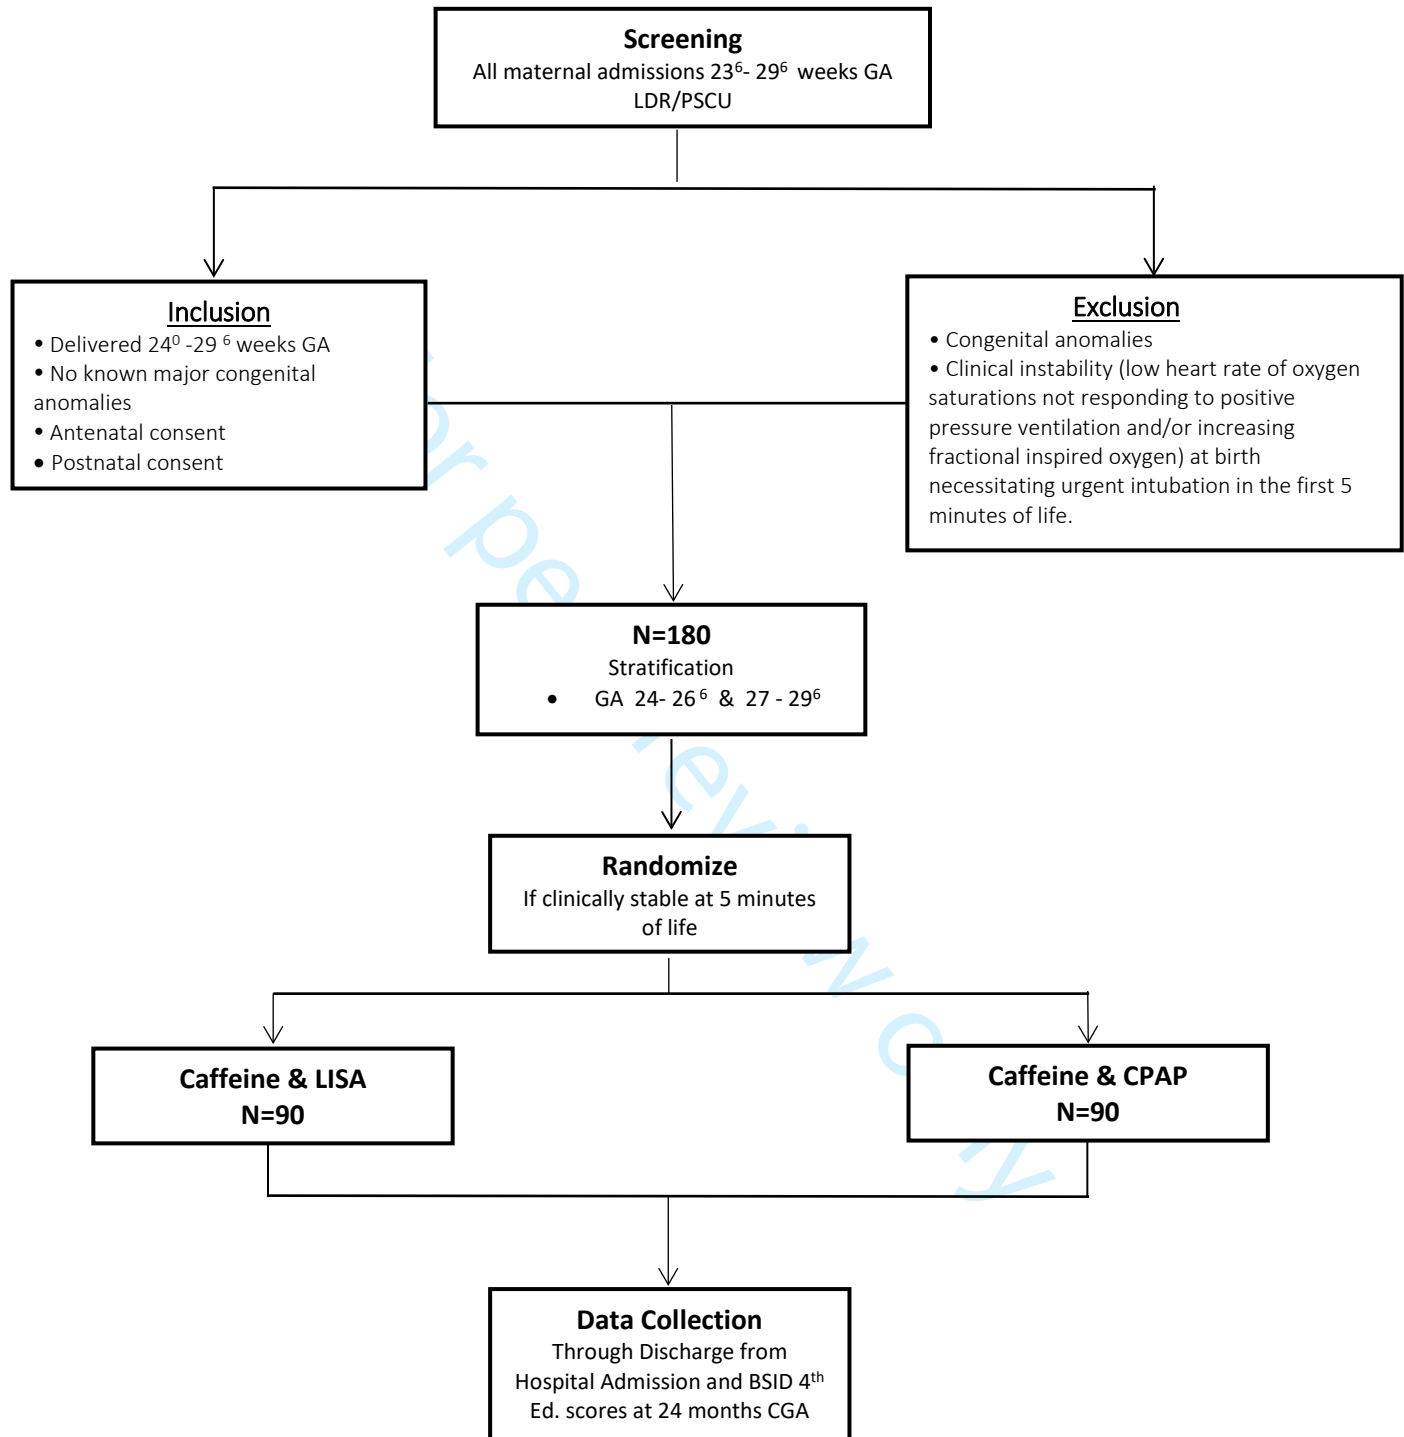

# CALI Study Randomization Card

Treatment: **CPAP & Caffeine**

Subject ID: \_\_\_\_\_

Site #: \_\_\_\_\_

Date/time of Randomization: \_\_\_\_/\_\_\_\_/\_\_\_\_ : \_\_\_\_  
MM / DD / YYYY HH : MM

|                                                                                                                                                   |                                                          |
|---------------------------------------------------------------------------------------------------------------------------------------------------|----------------------------------------------------------|
| <b>Complete at time of randomization</b>                                                                                                          |                                                          |
| 1. CPAP Level?                                                                                                                                    | _____ cmH2O                                              |
| 2. FiO2 requirement?                                                                                                                              | _____ %                                                  |
| 3. Vitals: HR/SpO2                                                                                                                                | HR: _____ Bpm    SpO2 _____ %                            |
| 4. Caffeine Therapy started in LDR/Resuscitation Rm?                                                                                              | <input type="checkbox"/> Yes <input type="checkbox"/> No |
| Notes/comments:                                                                                                                                   |                                                          |
| <p><b>If infant requires intubation within 72 hours of randomization, Please complete Intubation Card and call Neonatal Research at x6307</b></p> |                                                          |

**Affix patient label to back of this card**

Completed By (Name): \_\_\_\_\_ Date: \_\_\_\_/\_\_\_\_/\_\_\_\_

Treatment: **LISA & Caffeine**

Subject ID: \_\_\_\_\_ Site #: \_\_\_\_\_

Date/time of Randomization: \_\_\_\_/\_\_\_\_/\_\_\_\_ : \_\_\_\_  
MM / DD / YYYY HH : MM

**PLEASE REFER ON BACK OF CARD FOR LISA PROCEDURAL CHECKLIST**

|                                                                                                                |                                                                                                 |
|----------------------------------------------------------------------------------------------------------------|-------------------------------------------------------------------------------------------------|
| 9 FiO2: _____ CPAP: _____ SpO2: _____ HR: _____ at randomization                                               |                                                                                                 |
| 11 1. Caffeine Therapy started in<br>12 LDR/Resuscitation Rm?                                                  | <input type="checkbox"/> Yes <input type="checkbox"/> No                                        |
| 15 2. Start time of LISA (from<br>16 Laryngoscopy attempt)                                                     | Time: ____ : ____<br>HH : MM                                                                    |
| 18 3. Duration of Laryngoscopy<br>19 attempt? (Time of insertion to<br>20 removal)                             | 1 <sup>st</sup> _____ seconds<br>2 <sup>nd</sup> _____ seconds<br>3 <sup>rd</sup> _____ seconds |
| 21 4. Successful placement of LISA<br>22 catheter?                                                             | <input type="checkbox"/> Yes <input type="checkbox"/> No                                        |
| 23 5. Total surfactant administered<br>24 (2.5 mL/kg)                                                          | _____ mLs                                                                                       |
| 26 6. End time of LISA (removal of<br>27 angiocatheter)                                                        | Time: ____ : ____<br>HH : MM                                                                    |
| 29 7. Surfactant aspirated from<br>30 stomach or leaked from mouth<br>31 (failure/regurgitation from trachea?) | <input type="checkbox"/> Yes <input type="checkbox"/> No                                        |
| 32 8. Amount surfactant aspirated?                                                                             | _____ mLs                                                                                       |
| 34 9. Lowest HR during procedure?                                                                              | _____ Bpm                                                                                       |
| 35 10. Lowest SpO2 during procedure?                                                                           | _____ %                                                                                         |
| 37 11. Interventions?                                                                                          | Notes:                                                                                          |

**Affix patient label to back of this card**

44 Completed By (Name): \_\_\_\_\_ Date: \_\_\_\_/\_\_\_\_/\_\_\_\_ Peer review only - <http://bmjopen.bmj.com/site/about/guidelines.xhtml>

For peer review only

1  
2  
3  
4  
5  
6  
7  
8  
9  
10  
11  
12  
13  
14  
15  
16  
17  
18  
19  
20  
21  
22  
23  
24  
25  
26  
27  
28  
29  
30  
31  
32  
33  
34  
35  
36  
37  
38  
39  
40  
41  
42  
43  
44  
45  
46  
47

For peer review only

Use only if intubating within 72 HOURS

Use only if intubating within 72 HOURS

Date/Time of 72 hours after randomization: MM/DD/YYYY HH:MM

Date/Time of 72 hours after randomization: MM/DD/YYYY HH:MM

Subject ID: Site #:

Subject ID: Site #:

Treatment assignment: Caffeine & CPAP Caffeine & LISA

Treatment assignment: Caffeine & CPAP Caffeine & LISA

PLEASE COMPLETE & CALL Neonatal Research at X6307

PLEASE COMPLETE & CALL Neonatal Research at X6307

Form with 6 sections: 1. Date/Time of Intubation, 2. Duration of Laryngoscopy, 3. Was Intubation successful?, 4. Lowest HR during procedure?, 5. Lowest SpO2 during procedure?, 6. Reason Patient Intubated

Form with 6 sections: 1. Date/Time of Intubation, 2. Duration of Laryngoscopy, 3. Was Intubation successful?, 4. Lowest HR during procedure?, 5. Lowest SpO2 during procedure?, 6. Reason Patient Intubated

Affix patient label to back of this card

Affix patient label to back of this card

Completed By

Completed By

Printed Name: Initials: Date:

Printed Name: Initials: Date:

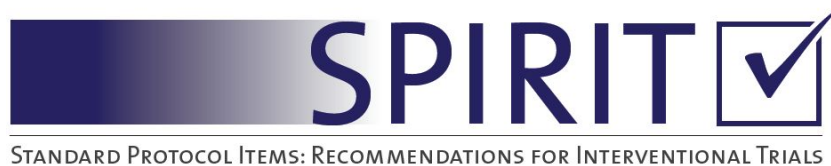

SPIRIT 2013 Checklist: Recommended items to address in a clinical trial protocol and related documents\*

| Section/item                      | Item No | Description                                                                                                                                                                                                                                                                              |
|-----------------------------------|---------|------------------------------------------------------------------------------------------------------------------------------------------------------------------------------------------------------------------------------------------------------------------------------------------|
| <b>Administrative information</b> |         |                                                                                                                                                                                                                                                                                          |
| Title                             | 1       | Descriptive title identifying the study design, population, interventions, and, if applicable, trial acronym                                                                                                                                                                             |
| Trial registration                | 2a      | Trial identifier and registry name. If not yet registered, name of intended registry                                                                                                                                                                                                     |
|                                   | 2b      | All items from the World Health Organization Trial Registration Data Set                                                                                                                                                                                                                 |
| Protocol version                  | 3       | Date and version identifier                                                                                                                                                                                                                                                              |
| Funding                           | 4       | Sources and types of financial, material, and other support                                                                                                                                                                                                                              |
| Roles and responsibilities        | 5a      | Names, affiliations, and roles of protocol contributors                                                                                                                                                                                                                                  |
|                                   | 5b      | Name and contact information for the trial sponsor                                                                                                                                                                                                                                       |
|                                   | 5c      | Role of study sponsor and funders, if any, in study design; collection, management, analysis, and interpretation of data; writing of the report; and the decision to submit the report for publication, including whether they will have ultimate authority over any of these activities |
|                                   | 5d      | Composition, roles, and responsibilities of the coordinating centre, steering committee, endpoint adjudication committee, data management team, and other individuals or groups overseeing the trial, if applicable (see Item 21a for data monitoring committee)                         |
| <b>Introduction</b>               |         |                                                                                                                                                                                                                                                                                          |
| Background and rationale          | 6a      | Description of research question and justification for undertaking the trial, including summary of relevant studies (published and unpublished) examining benefits and harms for each intervention                                                                                       |
|                                   | 6b      | Explanation for choice of comparators                                                                                                                                                                                                                                                    |
| Objectives                        | 7       | Specific objectives or hypotheses                                                                                                                                                                                                                                                        |
| Trial design                      | 8       | Description of trial design including type of trial (eg, parallel group, crossover, factorial, single group), allocation ratio, and framework (eg, superiority, equivalence, noninferiority, exploratory)                                                                                |

## Methods: Participants, interventions, and outcomes

|                      |     |                                                                                                                                                                                                                                                                                                                                                                                |
|----------------------|-----|--------------------------------------------------------------------------------------------------------------------------------------------------------------------------------------------------------------------------------------------------------------------------------------------------------------------------------------------------------------------------------|
| Study setting        | 9   | Description of study settings (eg, community clinic, academic hospital) and list of countries where data will be collected. Reference to where list of study sites can be obtained                                                                                                                                                                                             |
| Eligibility criteria | 10  | Inclusion and exclusion criteria for participants. If applicable, eligibility criteria for study centres and individuals who will perform the interventions (eg, surgeons, psychotherapists)                                                                                                                                                                                   |
| Interventions        | 11a | Interventions for each group with sufficient detail to allow replication, including how and when they will be administered                                                                                                                                                                                                                                                     |
|                      | 11b | Criteria for discontinuing or modifying allocated interventions for a given trial participant (eg, drug dose change in response to harms, participant request, or improving/worsening disease)                                                                                                                                                                                 |
|                      | 11c | Strategies to improve adherence to intervention protocols, and any procedures for monitoring adherence (eg, drug tablet return, laboratory tests)                                                                                                                                                                                                                              |
|                      | 11d | Relevant concomitant care and interventions that are permitted or prohibited during the trial                                                                                                                                                                                                                                                                                  |
| Outcomes             | 12  | Primary, secondary, and other outcomes, including the specific measurement variable (eg, systolic blood pressure), analysis metric (eg, change from baseline, final value, time to event), method of aggregation (eg, median, proportion), and time point for each outcome. Explanation of the clinical relevance of chosen efficacy and harm outcomes is strongly recommended |
| Participant timeline | 13  | Time schedule of enrolment, interventions (including any run-ins and washouts), assessments, and visits for participants. A schematic diagram is highly recommended (see Figure)                                                                                                                                                                                               |
| Sample size          | 14  | Estimated number of participants needed to achieve study objectives and how it was determined, including clinical and statistical assumptions supporting any sample size calculations                                                                                                                                                                                          |
| Recruitment          | 15  | Strategies for achieving adequate participant enrolment to reach target sample size                                                                                                                                                                                                                                                                                            |

## Methods: Assignment of interventions (for controlled trials)

### Allocation:

|                     |     |                                                                                                                                                                                                                                                                                                                                                          |
|---------------------|-----|----------------------------------------------------------------------------------------------------------------------------------------------------------------------------------------------------------------------------------------------------------------------------------------------------------------------------------------------------------|
| Sequence generation | 16a | Method of generating the allocation sequence (eg, computer-generated random numbers), and list of any factors for stratification. To reduce predictability of a random sequence, details of any planned restriction (eg, blocking) should be provided in a separate document that is unavailable to those who enrol participants or assign interventions |
|---------------------|-----|----------------------------------------------------------------------------------------------------------------------------------------------------------------------------------------------------------------------------------------------------------------------------------------------------------------------------------------------------------|

|    |                |     |                                                                         |
|----|----------------|-----|-------------------------------------------------------------------------|
| 1  |                |     |                                                                         |
| 2  | Allocation     | 16b | Mechanism of implementing the allocation sequence (eg, central          |
| 3  | concealment    |     | telephone; sequentially numbered, opaque, sealed envelopes),            |
| 4  | mechanism      |     | describing any steps to conceal the sequence until interventions are    |
| 5  |                |     | assigned                                                                |
| 6  |                |     |                                                                         |
| 7  | Implementation | 16c | Who will generate the allocation sequence, who will enrol participants, |
| 8  |                |     | and who will assign participants to interventions                       |
| 9  |                |     |                                                                         |
| 10 | Blinding       | 17a | Who will be blinded after assignment to interventions (eg, trial        |
| 11 | (masking)      |     | participants, care providers, outcome assessors, data analysts), and    |
| 12 |                |     | how                                                                     |
| 13 |                | 17b | If blinded, circumstances under which unblinding is permissible, and    |
| 14 |                |     | procedure for revealing a participant's allocated intervention during   |
| 15 |                |     | the trial                                                               |
| 16 |                |     |                                                                         |
| 17 |                |     |                                                                         |
| 18 |                |     |                                                                         |
| 19 |                |     |                                                                         |

### Methods: Data collection, management, and analysis

|    |                 |     |                                                                          |
|----|-----------------|-----|--------------------------------------------------------------------------|
| 20 |                 |     |                                                                          |
| 21 | Data collection | 18a | Plans for assessment and collection of outcome, baseline, and other      |
| 22 | methods         |     | trial data, including any related processes to promote data quality (eg, |
| 23 |                 |     | duplicate measurements, training of assessors) and a description of      |
| 24 |                 |     | study instruments (eg, questionnaires, laboratory tests) along with      |
| 25 |                 |     | their reliability and validity, if known. Reference to where data        |
| 26 |                 |     | collection forms can be found, if not in the protocol                    |
| 27 |                 | 18b | Plans to promote participant retention and complete follow-up,           |
| 28 |                 |     | including list of any outcome data to be collected for participants who  |
| 29 |                 |     | discontinue or deviate from intervention protocols                       |
| 30 |                 |     |                                                                          |
| 31 | Data            | 19  | Plans for data entry, coding, security, and storage, including any       |
| 32 | management      |     | related processes to promote data quality (eg, double data entry;        |
| 33 |                 |     | range checks for data values). Reference to where details of data        |
| 34 |                 |     | management procedures can be found, if not in the protocol               |
| 35 |                 |     |                                                                          |
| 36 | Statistical     | 20a | Statistical methods for analysing primary and secondary outcomes.        |
| 37 | methods         |     | Reference to where other details of the statistical analysis plan can be |
| 38 |                 |     | found, if not in the protocol                                            |
| 39 |                 | 20b | Methods for any additional analyses (eg, subgroup and adjusted           |
| 40 |                 |     | analyses)                                                                |
| 41 |                 | 20c | Definition of analysis population relating to protocol non-adherence     |
| 42 |                 |     | (eg, as randomised analysis), and any statistical methods to handle      |
| 43 |                 |     | missing data (eg, multiple imputation)                                   |
| 44 |                 |     |                                                                          |
| 45 |                 |     |                                                                          |
| 46 |                 |     |                                                                          |
| 47 |                 |     |                                                                          |
| 48 |                 |     |                                                                          |
| 49 |                 |     |                                                                          |
| 50 |                 |     |                                                                          |
| 51 |                 |     |                                                                          |

### Methods: Monitoring

|    |                 |     |                                                                      |
|----|-----------------|-----|----------------------------------------------------------------------|
| 52 |                 |     |                                                                      |
| 53 | Data monitoring | 21a | Composition of data monitoring committee (DMC); summary of its role  |
| 54 |                 |     | and reporting structure; statement of whether it is independent from |
| 55 |                 |     | the sponsor and competing interests; and reference to where further  |
| 56 |                 |     | details about its charter can be found, if not in the protocol.      |
| 57 |                 |     | Alternatively, an explanation of why a DMC is not needed             |
| 58 |                 |     |                                                                      |
| 59 |                 |     |                                                                      |
| 60 |                 |     |                                                                      |



|    |          |     |                                                                        |
|----|----------|-----|------------------------------------------------------------------------|
| 1  |          | 21b | Description of any interim analyses and stopping guidelines, including |
| 2  |          |     | who will have access to these interim results and make the final       |
| 3  |          |     | decision to terminate the trial                                        |
| 4  |          |     |                                                                        |
| 5  |          |     |                                                                        |
| 6  | Harms    | 22  | Plans for collecting, assessing, reporting, and managing solicited and |
| 7  |          |     | spontaneously reported adverse events and other unintended effects     |
| 8  |          |     | of trial interventions or trial conduct                                |
| 9  |          |     |                                                                        |
| 10 |          |     |                                                                        |
| 11 | Auditing | 23  | Frequency and procedures for auditing trial conduct, if any, and       |
| 12 |          |     | whether the process will be independent from investigators and the     |
| 13 |          |     | sponsor                                                                |
| 14 |          |     |                                                                        |

### Ethics and dissemination

|    |                   |     |                                                                               |
|----|-------------------|-----|-------------------------------------------------------------------------------|
| 15 |                   |     |                                                                               |
| 16 |                   |     |                                                                               |
| 17 | Research ethics   | 24  | Plans for seeking research ethics committee/institutional review board        |
| 18 | approval          |     | (REC/IRB) approval                                                            |
| 19 |                   |     |                                                                               |
| 20 |                   |     |                                                                               |
| 21 | Protocol          | 25  | Plans for communicating important protocol modifications (eg,                 |
| 22 | amendments        |     | changes to eligibility criteria, outcomes, analyses) to relevant parties      |
| 23 |                   |     | (eg, investigators, REC/IRBs, trial participants, trial registries, journals, |
| 24 |                   |     | regulators)                                                                   |
| 25 |                   |     |                                                                               |
| 26 | Consent or assent | 26a | Who will obtain informed consent or assent from potential trial               |
| 27 |                   |     | participants or authorised surrogates, and how (see Item 32)                  |
| 28 |                   |     |                                                                               |
| 29 |                   | 26b | Additional consent provisions for collection and use of participant data      |
| 30 |                   |     | and biological specimens in ancillary studies, if applicable                  |
| 31 |                   |     |                                                                               |
| 32 |                   |     |                                                                               |
| 33 | Confidentiality   | 27  | How personal information about potential and enrolled participants will       |
| 34 |                   |     | be collected, shared, and maintained in order to protect confidentiality      |
| 35 |                   |     | before, during, and after the trial                                           |
| 36 |                   |     |                                                                               |
| 37 | Declaration of    | 28  | Financial and other competing interests for principal investigators for       |
| 38 | interests         |     | the overall trial and each study site                                         |
| 39 |                   |     |                                                                               |
| 40 |                   |     |                                                                               |
| 41 | Access to data    | 29  | Statement of who will have access to the final trial dataset, and             |
| 42 |                   |     | disclosure of contractual agreements that limit such access for               |
| 43 |                   |     | investigators                                                                 |
| 44 |                   |     |                                                                               |
| 45 | Ancillary and     | 30  | Provisions, if any, for ancillary and post-trial care, and for                |
| 46 | post-trial care   |     | compensation to those who suffer harm from trial participation                |
| 47 |                   |     |                                                                               |
| 48 | Dissemination     | 31a | Plans for investigators and sponsor to communicate trial results to           |
| 49 | policy            |     | participants, healthcare professionals, the public, and other relevant        |
| 50 |                   |     | groups (eg, via publication, reporting in results databases, or other         |
| 51 |                   |     | data sharing arrangements), including any publication restrictions            |
| 52 |                   |     |                                                                               |
| 53 |                   | 31b | Authorship eligibility guidelines and any intended use of professional        |
| 54 |                   |     | writers                                                                       |
| 55 |                   |     |                                                                               |
| 56 |                   |     |                                                                               |
| 57 |                   | 31c | Plans, if any, for granting public access to the full protocol, participant-  |
| 58 |                   |     | level dataset, and statistical code                                           |
| 59 |                   |     |                                                                               |
| 60 |                   |     |                                                                               |

**Appendices**

|                            |    |                                                                                                                                                                                                |
|----------------------------|----|------------------------------------------------------------------------------------------------------------------------------------------------------------------------------------------------|
| Informed consent materials | 32 | Model consent form and other related documentation given to participants and authorised surrogates                                                                                             |
| Biological specimens       | 33 | Plans for collection, laboratory evaluation, and storage of biological specimens for genetic or molecular analysis in the current trial and for future use in ancillary studies, if applicable |

---

\*It is strongly recommended that this checklist be read in conjunction with the SPIRIT 2013 Explanation & Elaboration for important clarification on the items. Amendments to the protocol should be tracked and dated. The SPIRIT checklist is copyrighted by the SPIRIT Group under the Creative Commons "[Attribution-NonCommercial-NoDerivs 3.0 Unported](#)" license.

For peer review only

# BMJ Open

## A Multicenter, Randomized Trial of Preterm Infants receiving Caffeine and Less Invasive Surfactant Administration Compared to Caffeine and Early Continuous Positive Airway Pressure (CaLI Trial): Study Protocol

|                                 |                                                                                                                                                                                                                                                                                                                                                                                                                                                                                                                                                                                                                                                                                                                                                  |
|---------------------------------|--------------------------------------------------------------------------------------------------------------------------------------------------------------------------------------------------------------------------------------------------------------------------------------------------------------------------------------------------------------------------------------------------------------------------------------------------------------------------------------------------------------------------------------------------------------------------------------------------------------------------------------------------------------------------------------------------------------------------------------------------|
| Journal:                        | <i>BMJ Open</i>                                                                                                                                                                                                                                                                                                                                                                                                                                                                                                                                                                                                                                                                                                                                  |
| Manuscript ID                   | bmjopen-2020-038343.R2                                                                                                                                                                                                                                                                                                                                                                                                                                                                                                                                                                                                                                                                                                                           |
| Article Type:                   | Protocol                                                                                                                                                                                                                                                                                                                                                                                                                                                                                                                                                                                                                                                                                                                                         |
| Date Submitted by the Author:   | 21-Oct-2020                                                                                                                                                                                                                                                                                                                                                                                                                                                                                                                                                                                                                                                                                                                                      |
| Complete List of Authors:       | Ines, Felix; Sharp Mary Birch Hospital for Women and Newborns, Neonatal Research Institute<br>Hutson, Shandee; Sharp Mary Birch Hospital for Women and Newborns<br>Coughlin, Katherine; Sharp Mary Birch Hospital for Women and Newborns<br>Hopper, Andrew; Loma Linda University Medical Center<br>Banerji, Anamika; Loma Linda University Medical Center<br>Uy, Cherry; University of California Irvine<br>Finer, Neil; University of California San Diego<br>Rich, Wade; Sharp Mary Birch Hospital for Women and Newborns<br>Morales, Ana; Sharp Mary Birch Hospital for Women and Newborns<br>Steen, Jane; Sharp Mary Birch Hospital for Women and Newborns<br>Katheria, Anup; Sharp Mary Birch Hospital for Women and Newborns, Neonatology |
| <b>Primary Subject Heading</b>: | Paediatrics                                                                                                                                                                                                                                                                                                                                                                                                                                                                                                                                                                                                                                                                                                                                      |
| Secondary Subject Heading:      | Paediatrics                                                                                                                                                                                                                                                                                                                                                                                                                                                                                                                                                                                                                                                                                                                                      |
| Keywords:                       | Neonatal intensive & critical care < INTENSIVE & CRITICAL CARE, NEONATOLOGY, RESPIRATORY MEDICINE (see Thoracic Medicine)                                                                                                                                                                                                                                                                                                                                                                                                                                                                                                                                                                                                                        |
|                                 |                                                                                                                                                                                                                                                                                                                                                                                                                                                                                                                                                                                                                                                                                                                                                  |

SCHOLARONE™  
Manuscripts



I, the Submitting Author has the right to grant and does grant on behalf of all authors of the Work (as defined in the below author licence), an exclusive licence and/or a non-exclusive licence for contributions from authors who are: i) UK Crown employees; ii) where BMJ has agreed a CC-BY licence shall apply, and/or iii) in accordance with the terms applicable for US Federal Government officers or employees acting as part of their official duties; on a worldwide, perpetual, irrevocable, royalty-free basis to BMJ Publishing Group Ltd ("BMJ") its licensees and where the relevant Journal is co-owned by BMJ to the co-owners of the Journal, to publish the Work in this journal and any other BMJ products and to exploit all rights, as set out in our [licence](#).

The Submitting Author accepts and understands that any supply made under these terms is made by BMJ to the Submitting Author unless you are acting as an employee on behalf of your employer or a postgraduate student of an affiliated institution which is paying any applicable article publishing charge ("APC") for Open Access articles. Where the Submitting Author wishes to make the Work available on an Open Access basis (and intends to pay the relevant APC), the terms of reuse of such Open Access shall be governed by a Creative Commons licence – details of these licences and which [Creative Commons](#) licence will apply to this Work are set out in our licence referred to above.

Other than as permitted in any relevant BMJ Author's Self Archiving Policies, I confirm this Work has not been accepted for publication elsewhere, is not being considered for publication elsewhere and does not duplicate material already published. I confirm all authors consent to publication of this Work and authorise the granting of this licence.

1  
2  
3 **A Multicenter, Randomized Trial of Preterm Infants receiving Caffeine and Less Invasive**  
4 **Surfactant Administration Compared to Caffeine and Early Continuous Positive Airway**  
5 **Pressure (CaLI Trial): Study Protocol**  
6  
7  
8

9  
10 Felix Ines, Shandee Hutson, Katherine Coughlin, Andrew Hopper, Anamika Banerji, Cherry Uy,  
11  
12 Neil Finer, Wade Rich, Ana Morales, Jane Steen, Anup Katheria\*  
13

14  
15  
16 Neonatal Research Institute, Sharp Mary Birch Hospital for Women & Newborns, San Diego,  
17  
18 CA, United States.  
19

20  
21  
22  
23 Loma Linda University Medical Center, Loma Linda, CA, United States.  
24

25  
26  
27  
28 University of California Irvine Medical Center, Irvine, CA, United States.  
29

30  
31  
32 Corresponding author: Anup Katheria M.D., Neonatal Research Institute, Sharp Mary Birch  
33  
34 Hospital for Women & Newborns, San Diego, CA, United States. Email:  
35  
36  
37 Anup.Katheria@sharp.com  
38  
39  
40  
41  
42  
43  
44  
45  
46  
47  
48  
49  
50  
51  
52  
53  
54  
55  
56  
57

## ABSTRACT

**Introduction:** Respiratory Distress Syndrome (RDS) or surfactant deficiency occurs primarily in premature infants resulting in composite outcomes of death or bronchopulmonary dysplasia.

Initial management strategies for preterm infants with RDS includes early initiation of continuous positive airway pressure (CPAP) and titration of FiO<sub>2</sub>, and may include the use of less invasive surfactant administration (LISA) to avoid the need for mechanical ventilation. The use of the LISA method in the United States is limited, but, is widespread in Europe and Australia. In order to optimize success of non-invasive support, the use of early caffeine therapy may be critical to the success of LISA. We will conduct a multicenter, randomized trial to test whether infants that receive caffeine, CPAP, and surfactant via the LISA method compared to infants that receive caffeine and CPAP alone, have a decreased need for invasive mechanical ventilation in the first 72 hours of life.

**Methods and Analysis:** Consented premature infants with gestational age from 24 weeks to 29 weeks plus 6 days will be enrolled within 2 hours of life. Caffeine will be administered soon after randomization in both arms and prior to surfactant in the LISA arm or before 2 hours of life in the control arm. A future detailed statistical analysis plan will be made available prior to completion of the trial.

**Ethics and Dissemination:** This protocol and the template informed consent form contained in Appendix II was reviewed and approved by the sponsor and the applicable Institutional Review Boards with respect to scientific content and compliance with applicable research and human subject regulations.

Results will be published and presented at the Pediatric Academic Societies meeting upon completion and study participants will be provided a copy of the results of the research article.

**Clinical Trial Registration:** [www.Clinicaltrials.gov](http://www.Clinicaltrials.gov): NCT04209946

#### **STRENGTHS AND LIMITATIONS OF THIS TRIAL ARE:**

- Limited to power for longer term outcomes such as BPD and neurodevelopmental impairment due its smaller size
- Pragmatic in design and does not include blinding
- The first to be prescriptive in the use of caffeine as a co-intervention for LISA administration to test its benefit
- This study will be the most recent in many years to re-study the use of prophylactic surfactant with the LISA method compared to expectant management with CPAP alone.

#### **INTRODUCTION**

Premature infants are commonly born with respiratory distress syndrome (RDS) or surfactant deficiency that may lead into respiratory failure. Advances in respiratory management includes, early initiation of continuous positive airway pressure (CPAP) and titration of FiO<sub>2</sub>,<sup>1</sup> modifications in the administration of surfactant therapy using less invasive techniques, and the avoidance of mechanical ventilation.<sup>2</sup> Other strategies to optimize success of non-invasive support involves the use of caffeine therapy to serve as a respiratory stimulant. Dekker et al demonstrated that the administration of caffeine in the delivery room compared to upon admission to the NICU produced greater minute ventilation and tidal volumes in premature infants <30 weeks.<sup>3</sup> The less invasive surfactant administration (LISA) to spontaneously

1  
2  
3 breathing preterm infants has been reported to reduce the need for mechanical ventilation. <sup>4</sup>A  
4  
5 recent meta-analysis of non-invasive ventilation strategies demonstrated that Less Invasive  
6  
7 Surfactant Administration (LISA) had the lowest odd ratio (OR, 0.49; 95% CI 0.3-0.79) for the  
8  
9 development of the composite outcome of death or bronchopulmonary dysplasia amongst non-  
10  
11 invasive ventilation strategies compared to invasive mechanical ventilation. <sup>5</sup> The combination of  
12  
13 early Caffeine and LISA has not been tested and despite these results and studies showing it  
14  
15 decreased the need for invasive mechanical ventilation compared to Continuous Positive Airway  
16  
17 Pressure, the use of the LISA method in the United States is limited, however, is widely adapted  
18  
19 in Europe and Australia. <sup>6</sup>

## 25 26 **METHODS AND ANALYSIS**

27  
28 The study is designed as a multicenter, un-blinded, randomized trial of preterm infants receiving  
29  
30 Caffeine and Less Invasive Surfactant Administration compared to Caffeine and CPAP with a  
31  
32 primary outcome of frequency of subject endotracheal intubation between the two groups  
33  
34 (Caffeine and LISA vs Caffeine and CPAP) within the first 72 hours of life. The study will be  
35  
36 conducted at 3 sites in the United States (Loma Linda University Medical Center, University of  
37  
38 California, Irvine, and Sharp Mary Birch Hospital for Women & Newborns) over a 3 year  
39  
40 period. The following variables will be collected:

- 41  
42  
43  
44 1. Frequency of subjects requiring endotracheal intubation between the two groups (LISA  
45  
46 vs CPAP) in the first 72 hours of life
- 47  
48  
49 2. Duration of mechanical ventilation and/or CPAP
- 50  
51  
52 3. Requirement of supplemental oxygen at 36 weeks corrected age
- 53  
54  
55 4. Grade III and IV intraventricular hemorrhage
- 56  
57  
58 5. Spontaneous intestinal perforation



- 1
- 2
- 3 6. Necrotizing Enterocolitis
- 4
- 5 7. Retinopathy of prematurity requiring surgery
- 6
- 7 8. Need for repeat surfactant dosing
- 8
- 9

10 Long term neurodevelopmental data will also be collected throughout 2 years of age.

11  
12 Pregnant women will be identified and screened from the labor and delivery floor (LD) or  
13 perinatal special care unit (PSCU) at each site. Parents will be approached and consented prior to  
14 delivery. In the delivery room, after the infant's first five minutes of life, the research staff or  
15 neonatal delivery team will open the randomization envelope for the proper gestational age (GA)  
16 group. Multiples will be randomized to the same treatment group for ease of consent and family  
17 considerations. There is no crossover allowed between the LISA and CPAP groups, subjects  
18 should receive their randomized treatment. If the physician determines that the infant requires  
19 intubation or is determined to be unstable within the first five minutes of life, the infant will be  
20 intubated and excluded from the study.  
21  
22  
23  
24  
25  
26  
27  
28  
29  
30  
31  
32

### 33 **Inclusion Criteria:**

- 34 • Premature infants born at 24-29+6 weeks gestational age
- 35
- 36 • Informed consent obtained (antenatal/postnatal)
- 37
- 38 • Infant is spontaneously breathing on CPAP of 5-8 cmH<sub>2</sub>O with an FiO<sub>2</sub> of <.40 and
- 39
- 40 maintains a normal heart rate (HR>100 Bpm)
- 41
- 42
- 43
- 44
- 45

### 46 **Exclusion Criteria:**

- 47 • Declined consent
- 48
- 49 • Infants with known congenital anomalies
- 50
- 51 • Requiring intubation in the delivery room
- 52
- 53
- 54
- 55
- 56
- 57

1  
2  
3 All infants found to have anomalies post-randomization will be analyzed by intent to treat  
4  
5 principle.  
6  
7

8 **Patient Allocation:** Randomization cards are computer-generated by Sharp Mary Birch Hospital  
9  
10 for Women & Newborns and will solely be known by the data manager. Each randomization  
11  
12 card contains group assignment, real-time data information, and a randomization number, sealed  
13  
14 in an opaque envelope with a label that indicates the envelope sequence number, site (facility)  
15  
16 number, and stratification by gestational age. These envelopes will be logged by the data  
17  
18 manager in a secured data file and then distributed to each research facility. We will enroll 180  
19  
20 preterm infants and will stratify by gestational age (24-26+6 weeks and 27+0-29+6 weeks),  
21  
22 labeled as such on each opaque envelope.  
23  
24  
25

26  
27 **Randomization:**  
28

29 In order to allow for initial stabilization on CPAP, infants will not be randomized until at least 5  
30  
31 minutes of life. If the providers have not intubated or plan to intubate the infant in the delivery  
32  
33 room, consented infants that are assessed by a provider as clinically stable (i.e. HR >100 bpm)  
34  
35 and spontaneously breathing on CPAP (5-8 cm H<sub>2</sub>O) will be randomized. Stabilization of  
36  
37 premature infants at delivery may include stimulation, positive pressure ventilation or CPAP.  
38  
39 Only spontaneously breathing infants on CPAP, maintaining normal heart rate and saturations  
40  
41 will be included and randomized. When the neonatal provider assesses the infant to be stable on  
42  
43 CPAP, a member of the research or neonatal team will pull a randomization card according to  
44  
45 the infant's corrected gestational age. Once the treatment group is identified (Caffeine and LISA  
46  
47 or Caffeine and CPAP), intervention will immediately commence.  
48  
49  
50  
51  
52  
53  
54

55 **LISA Group:**  
56  
57

1  
2  
3 For infants randomized to LISA, an intravenous access will be established to administer caffeine.

4  
5 We will have an orogastric tube placed into the stomach prior to laryngoscopy and the contents  
6  
7 aspirated before and after the procedure to document any esophageal surfactant administration.

8  
9 Thereafter, a thin catheter (16G angiocatheter) will be measured and the depth of insertion will  
10  
11 be marked with intubation tape. The thin catheter will then be placed in the trachea under direct  
12  
13 or video-laryngoscopy by a neonatal practitioner. After the catheter is placed, the laryngoscope  
14  
15 will be removed, the angiocatheter held securely in place, and the infant allowed to  
16  
17 spontaneously breathe on CPAP. Surfactant (Curosurf 2.5 mL/kg, based on estimated fetal  
18  
19 weight) will be slowly administered over 1-2 minutes (approximately in 3 aliquots) assuring  
20  
21 synchronized instillation with infant's breathing pattern while on CPAP. After instillation, the  
22  
23 catheter will be immediately removed and CPAP will continue. If apnea occurs during or after  
24  
25 the procedure, positive pressure ventilation will be initiated. To improve adherence to protocol  
26  
27 interventions, all sites have agreed on using senior level physicians or neonatal practitioners that  
28  
29 have prior experience with the LISA method.

30  
31 Data collection in the LISA group is collected using the Caffeine and LISA Randomization card  
32  
33 (Supplemental file 1)

### 34 35 36 37 38 39 40 41 42 **CPAP Group:**

43  
44 In adherence to protocol interventions, infants randomized to early CPAP will be managed  
45  
46 according to sub-site unit practice for preterm infants on CPAP. If randomized to the CPAP  
47  
48 group, an intravenous access will be established to administer caffeine and the infant will  
49  
50 continue on CPAP unless infant meets failure criteria and requires intubation.

51  
52 Data collection in the CPAP group is collected using the Caffeine and CPAP Randomization  
53  
54 card (Supplemental file 2)

**Caffeine:**

Caffeine will be given in both groups as soon as IV access is obtained. Since caffeine must be given prior to the LISA procedure we have required that it must be given as early as possible but 2 hours of birth.

Similarly, if randomized to CPAP, caffeine will be given soon after birth. If infants in the CPAP group meet intubation criteria, and the loading dose of caffeine has not been administered, to avoid any delay in intubation, Caffeine will be given no later than thirty minutes after intubation.

The Caffeine preparation for this study is Caffeine Citrate with a loading dose of 20 mg/kg given via an intravenous access over 15-30 minutes. Time of Caffeine administration will be captured in subject's Electronic Medical Records (EMR).

**Blinding:**

Due to the nature of the intervention neither participants nor staff can be blinded to allocation, but are strongly encouraged not to disclose the allocation status of the participant at the follow up assessments.

As a pragmatic design we realize that a separate research team would not always be able to be present for the randomization and intervention. Therefore, the clinical team caring for the infant will follow strict guidelines for intubation and management of infants to reduce any post-randomization bias (see below)

**Intubation criteria:**

As an un-blinded trial, it is critical that both groups are standardized to avoid bias towards one arm for mechanical ventilation/treatment failure. Therefore, strict delivery room/ NICU criteria will be used. Furthermore, infants cannot be randomized before 5 minutes of life to ensure that unstable infants that cannot be transitioned on CPAP would not be included. These would

1  
2  
3 include infants that need intubation as specified in the Neonatal Resuscitation Program (NRP)  
4 guidelines <sup>7</sup> and such as: **1)** when chest compressions are needed; **2)** ineffective ventilation  
5 (inability to obtain good chest rise and fall despite implementation of the corrective ventilation  
6 steps: Mask adjustment; Reposition airway [try again]; Suction mouth and nose; Open mouth  
7 [try again]; Pressure increase [up to 40 cm H<sub>2</sub>O pressure]; Airway alternative; (MRSOPA), as  
8 indicated by the NRP guidelines to obtain effective ventilation); **3)** prolonged PPV (infants  
9 requiring positive pressure ventilation for more than 2 minutes in order to maintain HR >100  
10 BpM) ; or **4)** prolonged hypoxia (pre-ductal SpO<sub>2</sub> is not met despite 100% oxygen supplements  
11 and resuscitation interventions). Randomization should be delayed until the providers are  
12 comfortable that none of these criteria are met in order to avoid any early selection bias.  
13  
14

15  
16 After stabilization on CPAP infants can be randomized. Criteria for intubation/treatment failure  
17 will be recent guidelines for the management of RDS, <sup>1</sup> including: 1) CPAP level of 6-8 cmH<sub>2</sub>O  
18 and FiO<sub>2</sub> >0.40 required to maintain saturations 90%-95% for 2 hour after randomization; 2) a  
19 pH of 7.15 or less or a paCO<sub>2</sub> >65 mmHg on any (2) blood gases (arterial/capillary/or venous) at  
20 least 2 hours after randomization and in the first 72 hours of life; 3) continued  
21 Apnea/Bradycardia/Desaturation events despite nasal intermittent minute ventilation (NIMV)  
22 mode of ventilation. To avoid the bias of withheld ventilation since the study is not masked,  
23 infants with these criteria will be regarded as treatment failures.  
24  
25

26 For pragmatic purpose sites will be able to use their standard approach for non-invasive  
27 ventilation as they have agreed to use each mode (NCPAP or NIMV) equally regardless of  
28 randomization. Subsequent analysis will include primary mode of non-invasive ventilation.  
29  
30

31 Data collection on intubation will be collected using the Intubation card (Supplemental file 3)  
32  
33  
34  
35  
36  
37  
38  
39  
40  
41  
42  
43  
44  
45  
46  
47  
48  
49  
50

1  
2  
3 **Participant Timeline:** To indicate participant timeline between the Caffeine and LISA  
4 procedure vs the Caffeine and CPAP procedure, [Figure 1. CaLI Participant Timeline]  
5  
6  
7 (Supplemental File 4) is attached.  
8  
9

10  
11  
12 **Patient and Public Involvement:**  
13

14  
15 We have collaborated with parents by presenting this study to the Sharp Mary Birch Parent  
16 Advisory Board. Based on their experiences and preferences, we have incorporated their  
17 suggestions and they enthusiastically support the study. One of the parents has agreed to be on  
18 the DSMB to monitor the trial for safety. Their involvement includes input on the consent form  
19 and perspective on the means of recruitment to the study.  
20  
21  
22  
23  
24  
25  
26  
27  
28

29 **Study Overview Diagram:** (Supplemental File 5)  
30  
31  
32  
33

34 **Data Management and Collection:**  
35

36 Data will be managed using REDCap electronic data capture tools hosted and managed at Sharp  
37 Mary Birch Hospital for Women & Newborns. All collected variables are listed in the data report  
38 form, (DRF forms): LISA Data Collection (supplemental file 1), CPAP arm Delivery Room Data  
39 Collection (supplemental file 2), and CaLI Intubation Data Collection (supplemental file 3).  
40  
41  
42  
43  
44  
45  
46  
47  
48  
49  
50  
51  
52  
53  
54  
55  
56  
57  
58  
59  
60

60  
61  
62  
63  
64  
65  
66  
67  
68  
69  
70  
71  
72  
73  
74  
75  
76  
77  
78  
79  
80  
81  
82  
83  
84  
85  
86  
87  
88  
89  
90  
91  
92  
93  
94  
95  
96  
97  
98  
99  
100  
101  
102  
103  
104  
105  
106  
107  
108  
109  
110  
111  
112  
113  
114  
115  
116  
117  
118  
119  
120  
121  
122  
123  
124  
125  
126  
127  
128  
129  
130  
131  
132  
133  
134  
135  
136  
137  
138  
139  
140  
141  
142  
143  
144  
145  
146  
147  
148  
149  
150  
151  
152  
153  
154  
155  
156  
157  
158  
159  
160  
161  
162  
163  
164  
165  
166  
167  
168  
169  
170  
171  
172  
173  
174  
175  
176  
177  
178  
179  
180  
181  
182  
183  
184  
185  
186  
187  
188  
189  
190  
191  
192  
193  
194  
195  
196  
197  
198  
199  
200  
201  
202  
203  
204  
205  
206  
207  
208  
209  
210  
211  
212  
213  
214  
215  
216  
217  
218  
219  
220  
221  
222  
223  
224  
225  
226  
227  
228  
229  
230  
231  
232  
233  
234  
235  
236  
237  
238  
239  
240  
241  
242  
243  
244  
245  
246  
247  
248  
249  
250  
251  
252  
253  
254  
255  
256  
257  
258  
259  
260  
261  
262  
263  
264  
265  
266  
267  
268  
269  
270  
271  
272  
273  
274  
275  
276  
277  
278  
279  
280  
281  
282  
283  
284  
285  
286  
287  
288  
289  
290  
291  
292  
293  
294  
295  
296  
297  
298  
299  
300  
301  
302  
303  
304  
305  
306  
307  
308  
309  
310  
311  
312  
313  
314  
315  
316  
317  
318  
319  
320  
321  
322  
323  
324  
325  
326  
327  
328  
329  
330  
331  
332  
333  
334  
335  
336  
337  
338  
339  
340  
341  
342  
343  
344  
345  
346  
347  
348  
349  
350  
351  
352  
353  
354  
355  
356  
357  
358  
359  
360  
361  
362  
363  
364  
365  
366  
367  
368  
369  
370  
371  
372  
373  
374  
375  
376  
377  
378  
379  
380  
381  
382  
383  
384  
385  
386  
387  
388  
389  
390  
391  
392  
393  
394  
395  
396  
397  
398  
399  
400  
401  
402  
403  
404  
405  
406  
407  
408  
409  
410  
411  
412  
413  
414  
415  
416  
417  
418  
419  
420  
421  
422  
423  
424  
425  
426  
427  
428  
429  
430  
431  
432  
433  
434  
435  
436  
437  
438  
439  
440  
441  
442  
443  
444  
445  
446  
447  
448  
449  
450  
451  
452  
453  
454  
455  
456  
457  
458  
459  
460  
461  
462  
463  
464  
465  
466  
467  
468  
469  
470  
471  
472  
473  
474  
475  
476  
477  
478  
479  
480  
481  
482  
483  
484  
485  
486  
487  
488  
489  
490  
491  
492  
493  
494  
495  
496  
497  
498  
499  
500  
501  
502  
503  
504  
505  
506  
507  
508  
509  
510  
511  
512  
513  
514  
515  
516  
517  
518  
519  
520  
521  
522  
523  
524  
525  
526  
527  
528  
529  
530  
531  
532  
533  
534  
535  
536  
537  
538  
539  
540  
541  
542  
543  
544  
545  
546  
547  
548  
549  
550  
551  
552  
553  
554  
555  
556  
557  
558  
559  
560  
561  
562  
563  
564  
565  
566  
567  
568  
569  
570  
571  
572  
573  
574  
575  
576  
577  
578  
579  
580  
581  
582  
583  
584  
585  
586  
587  
588  
589  
590  
591  
592  
593  
594  
595  
596  
597  
598  
599  
600  
601  
602  
603  
604  
605  
606  
607  
608  
609  
610  
611  
612  
613  
614  
615  
616  
617  
618  
619  
620  
621  
622  
623  
624  
625  
626  
627  
628  
629  
630  
631  
632  
633  
634  
635  
636  
637  
638  
639  
640  
641  
642  
643  
644  
645  
646  
647  
648  
649  
650  
651  
652  
653  
654  
655  
656  
657  
658  
659  
660  
661  
662  
663  
664  
665  
666  
667  
668  
669  
670  
671  
672  
673  
674  
675  
676  
677  
678  
679  
680  
681  
682  
683  
684  
685  
686  
687  
688  
689  
690  
691  
692  
693  
694  
695  
696  
697  
698  
699  
700  
701  
702  
703  
704  
705  
706  
707  
708  
709  
710  
711  
712  
713  
714  
715  
716  
717  
718  
719  
720  
721  
722  
723  
724  
725  
726  
727  
728  
729  
730  
731  
732  
733  
734  
735  
736  
737  
738  
739  
740  
741  
742  
743  
744  
745  
746  
747  
748  
749  
750  
751  
752  
753  
754  
755  
756  
757  
758  
759  
760  
761  
762  
763  
764  
765  
766  
767  
768  
769  
770  
771  
772  
773  
774  
775  
776  
777  
778  
779  
780  
781  
782  
783  
784  
785  
786  
787  
788  
789  
790  
791  
792  
793  
794  
795  
796  
797  
798  
799  
800  
801  
802  
803  
804  
805  
806  
807  
808  
809  
810  
811  
812  
813  
814  
815  
816  
817  
818  
819  
820  
821  
822  
823  
824  
825  
826  
827  
828  
829  
830  
831  
832  
833  
834  
835  
836  
837  
838  
839  
840  
841  
842  
843  
844  
845  
846  
847  
848  
849  
850  
851  
852  
853  
854  
855  
856  
857  
858  
859  
860  
861  
862  
863  
864  
865  
866  
867  
868  
869  
870  
871  
872  
873  
874  
875  
876  
877  
878  
879  
880  
881  
882  
883  
884  
885  
886  
887  
888  
889  
890  
891  
892  
893  
894  
895  
896  
897  
898  
899  
900  
901  
902  
903  
904  
905  
906  
907  
908  
909  
910  
911  
912  
913  
914  
915  
916  
917  
918  
919  
920  
921  
922  
923  
924  
925  
926  
927  
928  
929  
930  
931  
932  
933  
934  
935  
936  
937  
938  
939  
940  
941  
942  
943  
944  
945  
946  
947  
948  
949  
950  
951  
952  
953  
954  
955  
956  
957  
958  
959  
960  
961  
962  
963  
964  
965  
966  
967  
968  
969  
970  
971  
972  
973  
974  
975  
976  
977  
978  
979  
980  
981  
982  
983  
984  
985  
986  
987  
988  
989  
990  
991  
992  
993  
994  
995  
996  
997  
998  
999  
1000

1  
2  
3 Data Coordinators will enter data information into REDCap and verified by the primary site Data  
4 coordinator and Research Coordinator prior to locking the subject's electronic data file.  
5  
6  
7  
8  
9

### 10 **Data and safety monitoring plan:**

11 An independent, well recognized, data safety monitoring board (DSMB) with experience with  
12 respiratory trials is chosen for this study. Drs. Brad Yoder and Wally Carlo have led and  
13 participated in a number of trials including: High-Flow Nasal Cannula, High Frequency  
14 Ventilation, and Surfactant. In addition, a former parent that has participated in research trials  
15 Kirsten Norman has agreed to serve on the DSMB. The DSMB will: 1) oversee the safety data  
16 on all study patients, 2) safeguard the interests of all study patients, 3) monitor the overall  
17 conduct of the trial, 4) advise the investigators in order to protect the integrity of the trial, and 5)  
18 supervise the conduct and analysis of all interim analyses. To this end, the DSMB will receive  
19 monthly reports from the trial on any injuries or adverse events, any developments that  
20 jeopardize the continued success of the trial, and data by which to accomplish the evaluation of  
21 predetermined early stopping rules. All SAEs, protocol deviations, non-serious adverse events  
22 (AEs), and unanticipated problems (UPs) will be reported to the Data Coordinating Center  
23 (DCC) and forwarded to the DSMB if indicated (see below). Reports of adverse events and  
24 recruitment will be sent monthly and demographics will be included with the interim and final  
25 safety and efficacy analyses. Interim analyses determined by the DSMB and the project  
26 statistician will be conducted independently from the trial leadership and staff. The definitions  
27 and reporting process are as follows:  
28  
29  
30  
31  
32  
33  
34  
35  
36  
37  
38  
39  
40  
41  
42  
43  
44  
45  
46  
47  
48  
49

50  
51 Serious Adverse Events defined as one or more of the following: decompensation during the  
52 administration of surfactant in either arm including the use of epinephrine in the delivery room  
53 and chest compressions, or death prior to discharge.  
54  
55  
56  
57

- 1  
2  
3 1. All SAEs will be reported within 72 hours of discovery of event, to the PI and the site  
4  
5 IRB.  
6
- 7 2. Any Unexpected AE or Serious Deviation will be reported within 7 days of discovery of  
8  
9 event to the Data Coordinating Center.  
10

#### 11 12 13 14 Non-Serious Events

15  
16 Unexpected events that are Non-Serious are reported not more than 14 days after the PI first  
17  
18 learns of the event. The DCC will forward all non-serious unexpected events to the DSMB, and  
19  
20 main study PI. All other expected outcomes of prematurity, i.e. BPD, IVH grades 1-4, ROP,  
21  
22 NEC, will be collected in the electronic database and reviewed in interim reports. We have  
23  
24 appointed a DSMB to work closely with the main study PI. There are no conflicts of interest with  
25  
26 these individuals, who are not research collaborators of, and are at separate institutions from the  
27  
28 investigators at the enrolling sites.  
29  
30

31  
32 The study will be closely monitored for issues of data quality, study conduct, and adverse events.  
33  
34 These analyses will be presented to the DSMB. Interim analyses will seek to identify results that  
35  
36 are sufficiently extreme and precise, this is to offset the goal of obtaining additional data that  
37  
38 might lead to more precise and perhaps less exaggerated and more convincing results, as well as  
39  
40 information about differences in treatment effect by subgroups of patients. Determinations on  
41  
42 stopping must reflect ethical considerations of the impact of interim results on clinical equipoise  
43  
44 as well as considerations on the potential impact (or lack of impact) of interim results on clinical  
45  
46 practice. The superiority must be tested in the context of this trial first and then superiority  
47  
48 assessed, unless the DSMB is ethically motivated to stop the trial for superiority.  
49  
50  
51  
52  
53  
54

#### 55 56 **Statistical Analysis Plan:**



1  
2  
3 A chart review of the databases at Sharp Mary Birch has shown that approximately 49% of our  
4  
5 infants 24-29+6 weeks' gestation were intubated and mechanically ventilated after 5 minutes of  
6  
7 life but within the first 72 hours of life. Therefore, a very conservative sample size calculation  
8  
9 indicates that in order to detect a 22% absolute reduction (a reduction from 49% to 27%) we  
10  
11 would need at least 75 subjects in each arm for an 80% power and a p-value of less than 0.05 for  
12  
13 significance. An adjustment of 1.12 derived from the NICHD Neonatal Research Network  
14  
15 Generic Database, allowed for multiples to be randomized to the same treatment introducing a  
16  
17 clustering effect.<sup>8</sup> In order to account for multiples and potential drop out of subjects we plan to  
18  
19 consent 90 subjects in each arm (180 subjects total). A future detailed statistical analysis plan  
20  
21 will be made available prior to completion of the trial.  
22  
23  
24  
25  
26  
27

## 28 **ETHICS AND DISSEMINATION**

29  
30  
31 Ethics approval has been obtained. Prior to any research procedure, consent will be obtained by  
32  
33 the primary investigator or a delegated sub-investigator or a research associate. The mother, or  
34  
35 legally authorized representative must sign the informed consent document. Mother (or surrogate  
36  
37 mother) must sign a HIPAA authorization providing access to her medical records for collection of  
38  
39 maternal data. Either mother or father or legal guardian can sign a HIPAA authorization providing  
40  
41 access to the child's medical record for data collection purposes. The subject's legally authorized  
42  
43 representatives will be given ample time to read the informed consent, ask questions of the research  
44  
45 team, and discuss the study with their family and/or the subject's physician. The informed consent  
46  
47 process will be documented in the electronic medical record and copies of the signed and dated  
48  
49 consent will be given to the subject's representatives, placed in the subject's physical chart, and  
50  
51 stored in a locked cabinet in the offices of the Neonatal Research Institute. Results will be  
52  
53  
54  
55  
56  
57

1  
2  
3 published and presented at the Pediatric Academic Societies meeting upon completion. Any  
4  
5 important protocol modifications will be communicated to sub-site lead investigators via secured  
6  
7 email which will include automated confirmation of receipt and recorded audio/visual meetings.  
8  
9

### 10 **Confidentiality:**

11  
12 All data will be safeguarded in accordance with the Health Insurance Portability and  
13  
14 Accountability Act (HIPAA) and the principles and practices of strict confidentiality. Data will  
15  
16 be maintained by numerical code rather than personal identifiers and computer-based files will  
17  
18 be available only to persons involved in the study through the use of access privileges and  
19  
20 passwords. All local databases will be secured with password-protected access systems. Forms,  
21  
22 lists, logbooks, appointment books, and any other listings that link participant ID numbers to  
23  
24 other identifying information will be stored in a separate, locked file in an area with limited  
25  
26 access.  
27  
28  
29  
30

### 31 **Protection against Risk:**

32  
33 Only research team members (with appropriate research training relevant to protection of human  
34  
35 subjects) shall have access to the project's databases. The final trial data set will remain with the  
36  
37 lead PI and DCC.  
38  
39  
40  
41

## 42 **APPENDIX II**

### 43 **Informed Consent Form**

### 44 **Abbreviations (in alphabetical order)**

45  
46  
47  
48  
49  
50 BPD = Bronchopulmonary Dysplasia (supplemental O2 at 36 weeks CGA)

51  
52  
53  
54 Bpm = beats per minute  
55  
56  
57

1  
2  
3 BSID-4= Bayley Scales of Infant and Toddler Development 4<sup>th</sup> ed  
4

5 CPAP = Continuous Positive Airway Pressure  
6

7 LISA = Less Invasive Surfactant Administration  
8

9 NCPAP = Nasal Continuous Positive Airway Pressure  
10

11 NICU=Neonatal Intensive Care Unit  
12

13 NIMV = Nasal Intermittent Minute Ventilation  
14

15 PPV = positive pressure ventilation with bag & mask  
16

17 RDS= Respiratory Distress Syndrome  
18

19 ROP= Retinopathy of Prematurity  
20

21 SMBHWN= Sharp Mary Birch Hospital for Women & Newborns  
22

23 LLU= Loma Linda University Medical Center  
24

25 UCI= University of California Irvine Medical Center  
26  
27

## 28 29 30 31 32 **PRINCIPAL INVESTIGATORS**

33 Anup Katheria MD, Sharp Mary Birch Hospital for Women & Newborns, San Diego, CA, USA  
34

35 Shandee Hutson MD, Sharp Mary Birch Hospital for Women & Newborns, San Diego, CA, USA  
36

37 Andrew Hopper, MD, Loma Linda University Medical Center, Loma Linda, CA, USA  
38

39 Anamika Banerji, MD, Loma Linda University Medical Center, Loma Linda, CA, USA  
40

41 Cherry Uy MD, University of California Irvine, Irvine, CA, USA  
42

43 Neil Finer MD, Sharp Mary Birch Hospital for Women & Newborns, San Diego, CA, USA  
44  
45

## 46 47 48 49 **Statistician**

50 Debra Poeltler, PhD, Sharp Mary Birch Hospital for Women & Newborns, San Diego, CA, USA  
51  
52  
53  
54  
55  
56  
57

## FUNDING STATEMENT

A grant to support the CaLI trial has been obtained from Chiesi Farmaceutici, S.p.A and with this financial support, the primary study site maintains ultimate authority overall study activities.

**Chiesi Grant #:** CRTX-GR-717

## COMPETING INTERESTS

The Principal Investigator for the overall trial and each study site declare no financial or other competing interests.

## CONTRIBUTORSHIP STATEMENT

**FI and AK developed the initial protocol and manuscript. SH, KC, AH, AB, CU, NF, WR helped revise the manuscript and protocol. AM and JS helped develop the dataset and variables for the manuscript.**

## REFERENCES:

1. Sweet DG, Carnielli V, Greisen G, et al. European Consensus Guidelines on the Management of Respiratory Distress Syndrome - 2019 Update. *Neonatology* 2019;115(4):432-50. doi: 10.1159/000499361 [published Online First: 2019/04/12]
2. Kribs A, Roll C, Gopel W, et al. Nonintubated Surfactant Application vs Conventional Therapy in Extremely Preterm Infants: A Randomized Clinical Trial. *JAMA pediatrics* 2015;169(8):723-30. doi: 10.1001/jamapediatrics.2015.0504 [published Online First: 2015/06/09]
3. Dekker J, Hooper SB, van Vonderen JJ, et al. Caffeine to improve breathing effort of preterm infants at birth: a randomized controlled trial. *Pediatric research* 2017;82(2):290-96. doi: 10.1038/pr.2017.45 [published Online First: 2017/03/14]
4. Gopel W, Kribs A, Ziegler A, et al. Avoidance of mechanical ventilation by surfactant treatment of spontaneously breathing preterm infants (AMV): an open-label, randomised, controlled trial. *Lancet (London, England)* 2011;378(9803):1627-34. doi: 10.1016/s0140-6736(11)60986-0 [published Online First: 2011/10/04]
5. Isayama T, Iwami H, McDonald S, et al. Association of Noninvasive Ventilation Strategies With Mortality and Bronchopulmonary Dysplasia Among Preterm Infants: A Systematic Review and

1  
2  
3 Meta-analysis. *JAMA : the journal of the American Medical Association* 2016;316(6):611-24. doi:  
4 10.1001/jama.2016.10708 [published Online First: 2016/08/18]

5 6. Bhayat S, Kaur A, Premadeva I, et al. Survey of less Invasive Surfactant Administration in England, slow  
6 adoption and variable practice. *Acta paediatrica* 2020;109(3):505-10. doi: 10.1111/apa.14995  
7 [published Online First: 2019/09/01]

8 7. Braner D, Denson S, Zaichkin J, et al. Textbook of neonatal resuscitation. Dallas, TX: American Heart  
9 Association 2000.

10 8. Finer NN, Carlo WA, Walsh MC, et al. Early CPAP versus surfactant in extremely preterm infants. *The*  
11 *New England journal of medicine* 2010;362(21):1970-9. doi: 10.1056/NEJMoa0911783  
12 [published Online First: 2010/05/18]  
13  
14  
15  
16  
17  
18  
19  
20  
21  
22  
23  
24  
25  
26  
27  
28  
29  
30  
31  
32  
33  
34  
35  
36  
37  
38  
39  
40  
41  
42  
43  
44  
45  
46  
47  
48  
49  
50  
51  
52  
53  
54  
55  
56  
57

# CALI Study Randomization Card

Treatment: **LISA & Caffeine**

Subject ID: \_\_\_\_\_ Site #: \_\_\_\_\_

Date/time of Randomization: \_\_\_\_/\_\_\_\_/\_\_\_\_ : \_\_\_\_:\_\_\_\_  
MM / DD / YYYY HH : MM

**PLEASE REFER ON BACK OF CARD FOR LISA PROCEDURAL CHECKLIST**

FiO2: \_\_\_\_\_ CPAP: \_\_\_\_\_ SpO2: \_\_\_\_\_ HR: \_\_\_\_\_ at randomization

|                                                                                                 |                                                                                                 |
|-------------------------------------------------------------------------------------------------|-------------------------------------------------------------------------------------------------|
| 1. Caffeine Therapy started in LDR/Resuscitation Rm?                                            | <input type="checkbox"/> Yes <input type="checkbox"/> No                                        |
| 2. Start time of LISA (from Laryngoscopy attempt)                                               | Time: ____:____<br>HH : MM                                                                      |
| 3. Duration of Laryngoscopy attempt? (Time of insertion to removal)                             | 1 <sup>st</sup> _____ seconds<br>2 <sup>nd</sup> _____ seconds<br>3 <sup>rd</sup> _____ seconds |
| 4. Successful placement of LISA catheter?                                                       | <input type="checkbox"/> Yes <input type="checkbox"/> No                                        |
| 5. Total surfactant administered (2.5 mL/kg)                                                    | _____ mLs                                                                                       |
| 6. End time of LISA (removal of angiocatheter)                                                  | Time: ____:____<br>HH : MM                                                                      |
| 7. Surfactant aspirated from stomach or leaked from mouth (failure/regurgitation from trachea)? | <input type="checkbox"/> Yes <input type="checkbox"/> No                                        |
| 8. Amount surfactant aspirated?                                                                 | _____ mLs                                                                                       |
| 9. Lowest HR during procedure?                                                                  | _____ Bpm                                                                                       |
| 10. Lowest SpO2 during procedure?                                                               | _____ %                                                                                         |
| 11. Interventions?                                                                              | Notes:                                                                                          |

**Affix patient label to back of this card**

Completed By (Name): \_\_\_\_\_ Date: \_\_\_\_/\_\_\_\_/\_\_\_\_ Peer review only - <http://bmjopen.bmj.com/site/about/guidelines.xhtml>

1 **Supplies for LISA procedure:**

2 ○ 16g angiocatheter, measured and marked insertion length with tape or

3 Sharpie, NEEDLE REMOVED

4

5 ○ Laryngoscope size:  00  0

6 ○ Laryngoscope type:  Video  Conventional

7 ○ Curosurf 2.5 mL/kg/dose in syringe

8 ○ 8 FR feeding tube and compatible syringe

9 ○ 2- 10 mL syringe

10 ○ Blunt plastic needle

11 ○ 7 inch IV small bore extension tubing

---

12 **PROCEDURE:**

13 ○ At randomization infant will be on CPAP

14 ○ Infant will be positioned in a “sniffing position”

15 ○ An 8 FR orogastric (OG) tube will be placed and gastric contents aspirated.

16 OG tube should remain in place during the LISA procedure

17

18 ○ Ensure adequate CPAP and Vital Signs (VS) stable

19 ○ Place IV for IV Caffeine loading dose

20 ○ Obtain 16 gauge catheter and **remove needle**

21 ○ Measure depth of catheter insertion using clean technique (6 + wt in Kg)

22 mark with a small piece of intubation tape or sharpie

23

24 ○ Provider visualizes vocal cords, inserts & stabilizes angiocatheter

25 ○ RCP attaches 7 inch IV small bore extension tubing to angiocatheter

26 ○ RCP attaches syringe with Curosurf to the extension tubing

27 ○ RCP slowly administers Curosurf over 1-2 minutes (approximately in 3

28 aliquots) while infant is spontaneously breathing on CPAP

29 ○ RCP will flush angiocath with 5 mLs of air to clear surfactant from

30 angiocatheter

31

32 ○ Provider will remove angiocatheter and infant will continue on CPAP

33 therapy

34 ○ Wean FiO2 as tolerated

35

36 **If infant requires intubation within 72 hours, Please complete Intubation**

37 **Card and call Neonatal Research at x6307**

For peer review only

39 Sharp Mary Birch Hospital for Women & Newborns. (2020). CaLI Study Randomization Card. v1.0

40 (Supplemental File 1)

# CALI Study Randomization Card

Treatment: **CPAP & Caffeine**

Subject ID: \_\_\_\_\_

Site #: \_\_\_\_\_

Date/time of Randomization: \_\_\_\_/\_\_\_\_/\_\_\_\_ : \_\_\_\_  
MM / DD / YYYY HH : MM

|                                                                                                                                                   |                                                          |
|---------------------------------------------------------------------------------------------------------------------------------------------------|----------------------------------------------------------|
| <b>Complete at time of randomization</b>                                                                                                          |                                                          |
| 1. CPAP Level?                                                                                                                                    | _____ cmH2O                                              |
| 2. FiO2 requirement?                                                                                                                              | _____ %                                                  |
| 3. Vitals: HR/SpO2                                                                                                                                | HR: _____ Bpm    SpO2 _____ %                            |
| 4. Caffeine Therapy started in LDR/Resuscitation Rm?                                                                                              | <input type="checkbox"/> Yes <input type="checkbox"/> No |
| Notes/comments:                                                                                                                                   |                                                          |
| <p><b>If infant requires intubation within 72 hours of randomization, Please complete Intubation Card and call Neonatal Research at x6307</b></p> |                                                          |

**Affix patient label to back of this card**

Completed By (Name): \_\_\_\_\_ Date: \_\_\_\_/\_\_\_\_/\_\_\_\_





## CaLI Study Overview Diagram (Supplemental File 4)

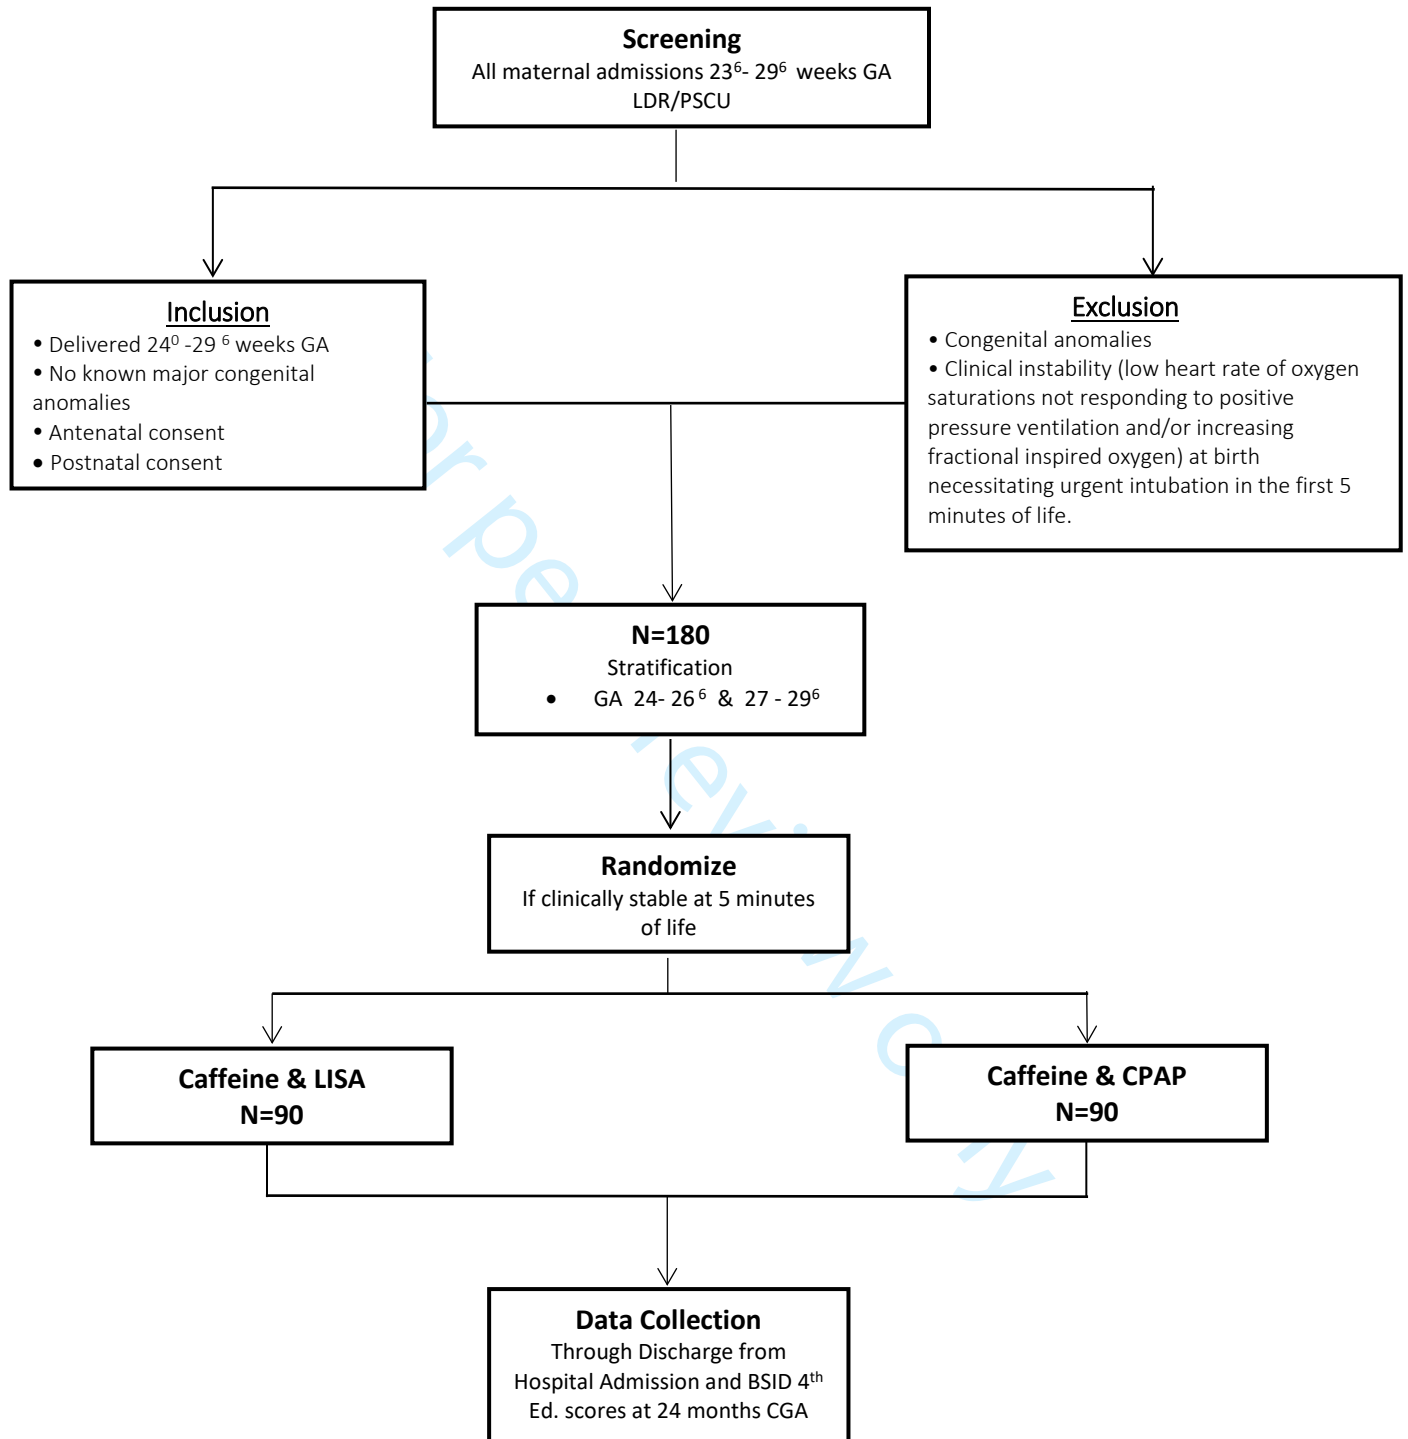

## INFORMED CONSENT

A Multicenter, Randomized Trial of Preterm Infants receiving **C**affeine and **L**ess **I**nvasive Surfactant Administration Compared to Caffeine and Early Continuous Positive Airway Pressure (CaLI Trial)

**IRB #**  
**1911902**

**Consent Date**  
**06Aug2020 v1.2**

### **Principal Investigator**

Anup Katheria, MD  
Neonatal Research Institute  
SHARP Mary Birch Hospital for Women and Newborns  
3003 Health Center Drive, San Diego, CA 92123

### **Research Grant**

Chiesi Farmaceutici S.p.A.

*If you are serving as a legally authorized representative, a guardian or are providing parental permission for a child in this study, the terms "you" and "your" refer to the person for whom you are providing consent or parental permission.*

**CALIFORNIA EXPERIMENTAL SUBJECT’S BILL OF RIGHTS**

You have been asked to participate as a subject in an experimental procedure. Before you decide whether you want to participate in the experimental procedure, you have a right to:

1. Be informed of the nature and purpose of the experiment;
2. Be given an explanation of the procedures to be followed in the medical experiment, and any drug or device to be utilized;
3. Be given a description of any discomforts and risks reasonably to be expected from your participation in the experiment;
4. Be given an explanation of any benefits reasonably to be expected from your participation in the experiment;
5. Be given a disclosure of any appropriate alternative procedures, drugs or devices that might be advantageous to you, and their relative risks and benefits;
6. Be informed of the avenues of medical treatment, if any, available to you after the experimental procedure if complications arise;
7. Be given an opportunity to ask any questions concerning the medical experiment or the procedures involved;
8. Be instructed that consent to participate in the experimental procedure may be withdrawn at any time and that you may discontinue participation in the medical experiment without prejudice;
9. Be given a copy of this form and the signed and dated written consent form; and
10. Be given the opportunity to decide to consent or not to consent to the medical experiment without the intervention of any element of force, fraud, deceit, duress, coercion or undue influence on your decision.

I have carefully read the information contained above and I understand fully my rights as a potential subject in a medical experiment involving people as subjects.

---

|                                                             |              |      |
|-------------------------------------------------------------|--------------|------|
| Signature of Parent or<br>Legally Authorized Representative | Printed Name | Date |
|-------------------------------------------------------------|--------------|------|

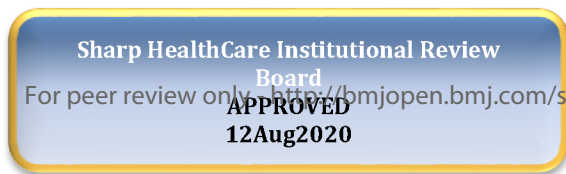

## PARTICIPATION IN A RESEARCH STUDY

This is a research study. The purpose of a research study is to answer scientific questions. We are asking for your permission to have your baby participate in a research study so that we can learn new information that may help others in the future. Research is not the same as routine treatment or medical care.

Your participation is voluntary. You do not have to allow your baby to be in this study. You are free to say yes or no, or to allow your baby to drop out after joining. If you decide not to participate there is no penalty or loss of benefits. Whatever you decide, your baby's regular medical care will not change.

This process is known as the informed consent process. It is important that you read this consent form and ask the study doctor any questions you may have. Please take your time to make your choice. Discuss it with your friends and family.

## WHY ARE YOU BEING ASKED TO TAKE PART IN THIS STUDY?

Your baby has been chosen because he/she may be born prematurely with immature lungs and a lack of natural lung surfactant, a fluid that coats the lungs and help them remain open. Due to this condition, your baby may not breathe well at birth or in the first days after birth and may benefit from receiving surfactant medicine or continuous airway pressure to help your baby's lungs remain open and improve oxygenation. Both Surfactant administration and continuous positive airway pressure (CPAP) are currently standard treatments for premature infants that need respiratory support after delivery.

Surfactant administration traditionally involves inserting a breathing tube in your baby's airway (intubation) and placing them on a breathing machine for respiratory support. Continuing on a breathing machine for a long period of time increases your baby's chance of developing bronchopulmonary dysplasia (BPD), a chronic lung disease of the neonate. Delivery room resuscitation of very premature infants has evolved dramatically over the past decades. Optimizing the care of these newborns now involves early continuous positive airway pressure (CPAP) and the avoidance of mechanical ventilation. However, mechanical ventilation is still often used when administering surfactant as the need arises.

The LISA method (Less Invasive Surfactant Administration) is another method that involves using a small catheter to administer surfactant directly into a baby's lungs. It also involves administering a precautionary dose of surfactant, compared to the traditional method which only administers doses of surfactant as needed using the breathing tube. A recent study in Europe showed that the Less Invasive Surfactant Administration (LISA) method had the lowest risk for the development of bronchopulmonary dysplasia (BPD) when compared to mechanical ventilation. Despite these results showing it decreased the need for mechanical ventilation compared to CPAP alone, there have been no studies done in the United States and the use of the LISA method is still not widely accepted.

We are conducting this study to find out if infants that receive surfactant by the LISA method (study method) compared to early CPAP and mechanical ventilation (standard method) require less intubation and less days on respiratory support.

## HOW MANY PEOPLE WILL TAKE PART IN THIS STUDY?

Approximately 180 babies will take part in the study. We will enroll 120 babies at Sharp Mary Birch Hospital for Women & Newborns, 30 babies at Loma Linda University Medical Center, and 30 babies at University of California Irvine Medical Center.

## HOW LONG WILL YOU BE IN THE STUDY?

Your baby will be in this study from birth through 2 years of age. We will also collect information about your baby from the 2-year follow-up visit described below.

## WHAT IS INVOLVED IN THIS STUDY?

We are asking for your permission to have your baby be in a research study so that we can learn new information that may help other babies.

If you decide to let your baby take part in the current research study and your baby needs support with breathing, your baby will be given CPAP through the nose. If your baby's breathing remains stable, he/she will be randomized (meaning based on chance, like flipping a coin) to either continuing on CPAP or being given a medicine called surfactant. The surfactant medicine is a small volume of liquid that will be placed directly into your baby's lungs using a small catheter (a small flexible tube). This is called the LISA method. This medication helps keep your baby's lung inflated and improves oxygenation.

Your baby will have a 50/50 chance of being placed in either group (CPAP or LISA). After your baby is placed on CPAP or given surfactant, he/she will be carefully monitored.

In either case if your baby needs more help with breathing, your baby's doctor will decide the best way to help support your baby's breathing which may include placement of an endotracheal tube into your baby's airway.

In some cases, your baby may require additional surfactant, if they are not breathing well or continue to need increased support such as additional oxygen. If your baby is in the CPAP group and becomes unwell in this study, your baby's doctor may decide to provide an initial dose of surfactant, and maybe more doses, as needed. This would require insertion of a regular endotracheal breathing tube (if not already placed), which is the current standard practice for providing surfactant.

If your baby is in the LISA group and becomes unwell in this study, your baby's doctor may decide to provide additional doses of surfactant as needed. This will be done by insertion of a regular endotracheal tube.

The procedures of the study are described below. The decision for treatment will be made at the first 5 minutes after your baby's birth.

- The doctor will evaluate your baby's condition at birth. If your doctor determines that your baby needs immediate placement of an endotracheal tube to assist breathing, your baby will not be in the study. Babies who are intubated at birth will not be in the study.
- If your baby is stable and breathing on his/her own with CPAP, he/she will be randomized to either the LISA group with CPAP or CPAP alone. This is done by selecting an envelope which contains a card telling the team which treatment the baby will receive.

During the NICU hospitalization, your baby will be continuously monitored to check the health of your baby's heart, brain and lungs and overall condition. This is normally part of the standard care for preterm babies.

## OUTPATIENT FOLLOW-UP

All premature babies are evaluated periodically (at 6 months, then once a year) as part of routine care at the Nemeth NICU Follow-up Clinic during the first 2 years of life. At these visits, the doctors and nurses who work at the clinic will check your baby's health and development. At every visit, they will ask questions about your living arrangements and your baby's medical condition. They will evaluate your baby's development using toys and items that are part of a developmental test. They will do a physical exam and check your baby's muscle strength and reflexes (neurologic exam).

## WHAT IS THE RESEARCH PART OF OUTPATIENT FOLLOW-UP?

The research visit is between 22-26 months corrected age (2 years from your baby's original due date). At this visit, the doctors and nurses will do everything listed above that is routine for your infant given their prematurity. The results of the routine evaluation will be obtained as part of our data collection. We will use a study number, not your child's name to ensure confidentiality and anonymity of your medical information.

After that, your baby's involvement will be completed and there are no further study requirements for your baby.

## WHAT ARE THE RISKS OF THE STUDY?

Both methods of administering surfactant either by the LISA method or the endotracheal tube are practiced in our NICU. The surfactant used in this trial is our current standard surfactant.

You should note:

- Infants randomized to the LISA group could receive an extra dose of surfactant when they otherwise might not have if they were not part of the study.
- Infants randomized to the CPAP group may receive mechanical ventilation that they otherwise might not have if they were not part of the study
- The catheter used in the LISA method is being used off-label, meaning it is used in a way that is different from the FDA's approved packaging label. It is used intratracheally (into the trachea) rather than intravenously (into the vein).

Risks of surfactant include:

- Low blood oxygen level
- Slow heart rate
- Low blood pressure

Risks of Intra-tracheal catheter:

- There may be risks that are unknown at this time

Risks of mechanical ventilation include:

- Volutrauma- over expansion of the lungs by delivery of too much gas
- Pneumothorax- is a collapsed lung
- Pneumonia- lung infection
- Development of Bronchopulmonary Dysplasia (BPD)- a chronic lung disease that affects premature infants

Based on the current literature to date, there are no increased risks with less invasive administration of surfactant with a small catheter (i.e. the LISA method) compared to endotracheal administration of surfactant in several large European trials. All risks with conducting this study are associated with prematurity including severe IVH, death, retinopathy of prematurity, chronic lung disease and other lung problems such as possible air leaks. There should be no more risks for babies in this study than are possible for any Extreme Low Birth Weight (ELBW) baby needing surfactant therapy. However, as with all research, there may be risks that are unknown at this time.

### **ARE THERE BENEFITS TO TAKING PART IN THIS STUDY?**

There may or may not be direct benefits to your baby for participating in this study. We hope the information we learn will help babies with respiratory distress syndrome in the future.

### **WHAT OTHER OPTIONS ARE THERE?**

Your baby's alternative is to not participate in this study and receive treatment of Respiratory Distress Syndrome as prescribed by your personal physician. Your doctor will discuss these alternative treatments with you as well as their benefits and risks.

### **WILL YOU OR YOUR CHILD BE PAID TO BE IN THIS STUDY?**

You and your child will not be paid to be in this study. No additional compensation is available for participation in this study.

### **WHAT ARE THE COSTS?**

The study drug, Curosurf, will be provided for you at no cost by the study sponsor.

There are no additional costs to be in this study. You and/or your health plan/insurance company are responsible for the cost of your baby's hospitalization and standard clinical care provided. You will be responsible for co-pays and deductibles in the same way as outside of a clinical trial.



1  
2 For more information about your costs, please discuss with the hospital's billing department, or  
3 call your health plan/insurance company to find out your financial responsibility for this trial.  
4

## 5 **RESEARCH-RELATED INJURY**

6

7  
8 If your baby gets sick or injured in this study, please tell your study doctor. Your baby will be  
9 treated or referred for medical treatment. You or your insurance will be responsible for the cost  
10 of treatment.  
11

12 Sharp HealthCare will not provide any compensation for treatment of research related injury or  
13 illness.  
14

## 15 **PAYMENT TO STUDY SITE**

16

17  
18 CHIESI has provided a grant to Sharp Mary Birch Hospital for Women & Newborns to reimburse  
19 the study site for expenses related to the conduct of this study. This includes providing the  
20 Surfactant medication your baby may receive while in the study.  
21

## 22 **NEW INFORMATION**

23

24  
25 You will be told if any important new information is found during the course of this study that  
26 may affect your wanting to continue. If you decide to continue in the study, your study doctor  
27 may ask you to sign an updated consent form.  
28

## 29 **WHAT ABOUT CONFIDENTIALITY?**

30

31  
32 Efforts will be made to keep your personal information confidential. We cannot guarantee  
33 absolute confidentiality. Your personal information may be disclosed if required by law.  
34 Organizations or individuals that may inspect and/or copy your medical and/or research records  
35 for quality assurance and data analysis include groups such as:

- 36 • Study Doctor and Research Staff at the Neonatal Research Institute
  - 37 • Sharp HealthCare Institutional Review Board (IRB, a group of people who review the  
38 research to protect your rights)
  - 39 • The Food & Drug Administration (FDA)
- 40  
41

42  
43 Your information will be coded and stored anonymously in a database with information about  
44 other people in this study. Access to this database is limited to the research staff.  
45 Under California law, we must report information about known or reasonably suspected  
46 incidents of abuse or neglect of a child including physical, sexual, emotional, and financial abuse  
47 or neglect. If any investigator has or is given such information, he or she may be required to  
48 report such information to the appropriate authorities.  
49

50  
51 As part of this research study you will be asked to sign an additional document,  
52 Authorization to use Protected Health Information (PHI). This authorization will explain in  
53 further detail how your and your baby's PHI will be used and shared in the study, who will  
54 have access to it, what information will be obtained, and how long Sharp HealthCare will  
55 use your information. It will also explain what to do if you decide you no longer want to  
56 share your PHI, and your rights regarding your ability to see and copy your research  
57 information.  
58

59  
60

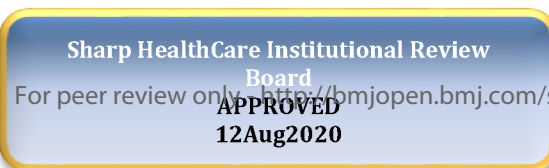

If the results of this study are published or presented at meetings, your identity will remain confidential.

## WHAT ARE YOUR RIGHTS AS A PARTICIPANT?

Participating in this study is entirely voluntary. You may refuse to allow your baby to participate or withdraw your baby at any time without penalty or loss of benefits to which you or your baby are entitled. If you decide that you no longer want your baby to continue in this study, we encourage you to talk to the study doctor. Please contact Dr. Katheria to tell him you no longer want to participate:

Dr. Anup Katheria  
(858) 939-4170  
[Anup.katheria@sharp.com](mailto:Anup.katheria@sharp.com)

If you decide to remove your baby from the study, the study team may ask your permission to keep your baby's test results and information that has already been collected.

## WHOM DO YOU CALL IF YOU HAVE ANY PROBLEMS, COMPLAINTS, CONCERNS, OR QUESTIONS?

If you have problems, complaints, concerns, or questions about this study, you may talk to your study doctor anytime.

|                                                                                                                             |                                                                                                                      |
|-----------------------------------------------------------------------------------------------------------------------------|----------------------------------------------------------------------------------------------------------------------|
| <b>If you have questions about:</b>                                                                                         | <b>Call:</b>                                                                                                         |
| This study (including complaints and requests for information)                                                              | 858-939-4170 Dr. Anup Katheria<br>858-939-6307 Neonatal Research Institute                                           |
| If you get sick or hurt in this study                                                                                       | 858-939-4170 Dr. Anup Katheria                                                                                       |
| Your rights as a research participant and:                                                                                  | Sharp HealthCare Institutional Review Board<br>7930 Frost Street, Suite 300<br>San Diego, CA 92123<br>(858) 939-7195 |
| <ul style="list-style-type: none"> <li>• Discuss problems, concerns, and questions</li> <li>• Obtain information</li> </ul> |                                                                                                                      |

## WHERE CAN YOU GET MORE INFORMATION?

A description of this clinical trial is available on <http://www.ClinicalTrials.gov>, as required by U.S. law. This web site will not include information that can identify you or other participants. At most, the web site will include a summary of the results. You can search the web site at any time. The registration identifier for this study is NCT#04209946.

**STATEMENT OF CONSENT**

Your signature below means that you have read the above information about this study and have had a chance to ask questions to help you carefully consider whether you agree to have your child take part in this study and how your and your child’s information will be used.

You can change your mind later if you want to. You will be given a copy of this consent form including a copy of the Subject’s Bill of Rights. By signing this consent form you are not giving up any of your or your child’s legal rights.

You agree to participate in this research study.

---

**Printed Name of Participant (Baby)**

---

|                                                                 |                     |             |
|-----------------------------------------------------------------|---------------------|-------------|
| <b>SIGNATURE OF PARENT OR LEGALLY AUTHORIZED REPRESENTATIVE</b> | <b>PRINTED NAME</b> | <b>DATE</b> |
|-----------------------------------------------------------------|---------------------|-------------|

---

**AUTHORITY OF SIGNED OR RELATIONSHIP TO PARTICIPANT**

---

|                                                     |                     |             |
|-----------------------------------------------------|---------------------|-------------|
| <b>SIGNATURE OF PRINCIPAL INVESTIGATOR/DESIGNEE</b> | <b>PRINTED NAME</b> | <b>DATE</b> |
|-----------------------------------------------------|---------------------|-------------|

----- **USE THE FOLLOWING ONLY IF APPLICABLE** -----

*If this consent form is read to the participant because the participant is unable to read the form, an impartial witness not affiliated with the research or study doctor must be present for the consent and sign the following statement:*

I confirm that the information in the consent form and any other written information was accurately explained to, and apparently understood by, the participant. The participant freely consented to be in the research study.

---

**PRINTED NAME OF IMPARTIAL WITNESS**

---

|                                       |             |             |
|---------------------------------------|-------------|-------------|
| <b>SIGNATURE OF IMPARTIAL WITNESS</b> | <b>DATE</b> | <b>TIME</b> |
|---------------------------------------|-------------|-------------|

**NOTE:** *This signature block cannot be used for translations into another language. A translated consent form is necessary for enrolling participants who do not speak English.*

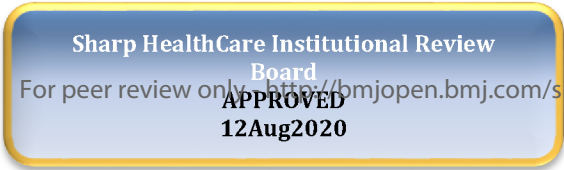

## Authorization to Use your Protected Health Information (PHI)

**Study Title:** A Multicenter, Randomized Trial of Preterm Infants receiving **C**affeine and **L**ess **I**nvasive Surfactant Administration Compared to Caffeine and Early Continuous Positive Airway Pressure (CaLI Trial)

**Investigator:** Anup Katheria, MD  
Neonatal Research Institute  
Sharp Mary Birch Hospital for Women & Newborns

**Research Grant:** Chiesi Farmaceutici S.p.A

---

**Protected Health Information**, or PHI, is any personal health information through which you or your baby can be identified. We are asking for your permission to use your baby's PHI in this research study. The information we may use includes maternal (prenatal) data from your baby's record, your baby's present health information, information that can be used to contact you, and results of your and your baby's medical tests. Maternal data will be collected from your baby's medical record; your medical record will be accessed for study purposes. The specific items of information that will be used and disclosed include:

- Maternal (prenatal) information related to the health of your baby, including:
  - Information about mother's pregnancy
  - Fetal History
  - Pregnancy complications
  - Medications for mother
  - Delivery record
- Information from your baby's medical record, including:
  - Medications for baby
  - Results of lab tests
  - Blood gases
  - Respiratory management

- Vital signs
- Diagnoses

The following people will access and use your baby's PHI for the purpose of this research:

- Dr. Anup Katheria, Primary Investigator, Sharp Mary Birch Hospital for Women & Newborns
- Sharp Mary Birch Hospital Neonatologists
- Research Staff at Sharp Mary Birch Hospital for Women & Newborns

### **Who may see your PHI?**

Certain offices and people other than the researchers may look at your medical charts and study records. There may be times when federal or state law requires the sharing of such records. This is very unlikely, but if sharing the information is ever required, Sharp Mary Birch Hospital for Women & Newborns will take steps allowable by law to protect the confidentiality of personal information. If this information is shared with outside reviewers for audit purposes, it may be further shared by them and may not be covered by the federal privacy laws.

Representatives that may review your study records:

- the Sharp HealthCare Institutional Review Board (IRB; a group of people that review the research to protect the rights of research participants)
- the US Food and Drug Administration

### **How long will the Neonatal Research Institute use your information, and what will it be used for?**

- Your and your baby's PHI may be used and shared until December 31, 2044.

The groups above will use your health information:

- To complete this research
- To evaluate the results of the study
- To check that the study is being done properly

### **What if you change your mind and want to withdraw your authorization for the use and disclosure of your PHI for this study?**

You must write to the study doctor and tell him that you no longer want to share your child’s information at: Anup Katheria, MD. Neonatal Research Institute, Sharp Mary Birch Hospital for Women & Newborns, 3003 Health Center Drive, San Diego, CA 92123.

- Your baby will no longer be a part of the research study because the study doctor, and the research staff will not be able to use any new information about your baby.
- The research team can continue to use any of the PHI that was already collected.
- You and your baby will still get the same medical care that you have always had from Sharp Mary Birch Hospital for Women & Newborns.

**Do you have the right to see and receive a copy of your research information?**

You can see your research information if:

- It is also being used for your and your baby’s current treatment, or
- At the end of the study.

\*\*\*\*\*

**Authorization:**

If you agree to share your and your baby’s PHI, you must sign this form below. If you do not sign this form, you and your baby will not be able to participate in this research study. You will be given a copy of this form.

\_\_\_\_\_  
Printed Names of Mother and Baby

|                                                                   |                       |               |
|-------------------------------------------------------------------|-----------------------|---------------|
| _____<br>Signature of Mother or Legally Authorized Representative | _____<br>Printed Name | _____<br>Date |
|-------------------------------------------------------------------|-----------------------|---------------|

|                              |                       |               |
|------------------------------|-----------------------|---------------|
| _____<br>Signature of Father | _____<br>Printed Name | _____<br>Date |
|------------------------------|-----------------------|---------------|

\_\_\_\_\_  
Authority of Signee or Relationship to Participant

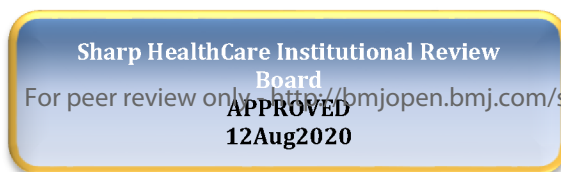



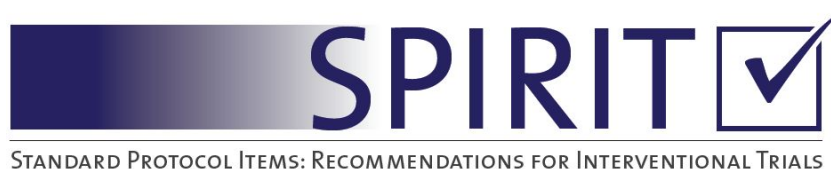

SPIRIT 2013 Checklist: Recommended items to address in a clinical trial protocol and related documents\*

| Section/item                      | Item No | Description                                                                                                                                                                                                                                                                              |
|-----------------------------------|---------|------------------------------------------------------------------------------------------------------------------------------------------------------------------------------------------------------------------------------------------------------------------------------------------|
| <b>Administrative information</b> |         |                                                                                                                                                                                                                                                                                          |
| Title                             | 1       | Descriptive title identifying the study design, population, interventions, and, if applicable, trial acronym                                                                                                                                                                             |
| Trial registration                | 2a      | Trial identifier and registry name. If not yet registered, name of intended registry                                                                                                                                                                                                     |
|                                   | 2b      | All items from the World Health Organization Trial Registration Data Set                                                                                                                                                                                                                 |
| Protocol version                  | 3       | Date and version identifier                                                                                                                                                                                                                                                              |
| Funding                           | 4       | Sources and types of financial, material, and other support                                                                                                                                                                                                                              |
| Roles and responsibilities        | 5a      | Names, affiliations, and roles of protocol contributors                                                                                                                                                                                                                                  |
|                                   | 5b      | Name and contact information for the trial sponsor                                                                                                                                                                                                                                       |
|                                   | 5c      | Role of study sponsor and funders, if any, in study design; collection, management, analysis, and interpretation of data; writing of the report; and the decision to submit the report for publication, including whether they will have ultimate authority over any of these activities |
|                                   | 5d      | Composition, roles, and responsibilities of the coordinating centre, steering committee, endpoint adjudication committee, data management team, and other individuals or groups overseeing the trial, if applicable (see Item 21a for data monitoring committee)                         |
| <b>Introduction</b>               |         |                                                                                                                                                                                                                                                                                          |
| Background and rationale          | 6a      | Description of research question and justification for undertaking the trial, including summary of relevant studies (published and unpublished) examining benefits and harms for each intervention                                                                                       |
|                                   | 6b      | Explanation for choice of comparators                                                                                                                                                                                                                                                    |
| Objectives                        | 7       | Specific objectives or hypotheses                                                                                                                                                                                                                                                        |
| Trial design                      | 8       | Description of trial design including type of trial (eg, parallel group, crossover, factorial, single group), allocation ratio, and framework (eg, superiority, equivalence, noninferiority, exploratory)                                                                                |



## Methods: Participants, interventions, and outcomes

|                      |     |                                                                                                                                                                                                                                                                                                                                                                                |
|----------------------|-----|--------------------------------------------------------------------------------------------------------------------------------------------------------------------------------------------------------------------------------------------------------------------------------------------------------------------------------------------------------------------------------|
| Study setting        | 9   | Description of study settings (eg, community clinic, academic hospital) and list of countries where data will be collected. Reference to where list of study sites can be obtained                                                                                                                                                                                             |
| Eligibility criteria | 10  | Inclusion and exclusion criteria for participants. If applicable, eligibility criteria for study centres and individuals who will perform the interventions (eg, surgeons, psychotherapists)                                                                                                                                                                                   |
| Interventions        | 11a | Interventions for each group with sufficient detail to allow replication, including how and when they will be administered                                                                                                                                                                                                                                                     |
|                      | 11b | Criteria for discontinuing or modifying allocated interventions for a given trial participant (eg, drug dose change in response to harms, participant request, or improving/worsening disease)                                                                                                                                                                                 |
|                      | 11c | Strategies to improve adherence to intervention protocols, and any procedures for monitoring adherence (eg, drug tablet return, laboratory tests)                                                                                                                                                                                                                              |
|                      | 11d | Relevant concomitant care and interventions that are permitted or prohibited during the trial                                                                                                                                                                                                                                                                                  |
| Outcomes             | 12  | Primary, secondary, and other outcomes, including the specific measurement variable (eg, systolic blood pressure), analysis metric (eg, change from baseline, final value, time to event), method of aggregation (eg, median, proportion), and time point for each outcome. Explanation of the clinical relevance of chosen efficacy and harm outcomes is strongly recommended |
| Participant timeline | 13  | Time schedule of enrolment, interventions (including any run-ins and washouts), assessments, and visits for participants. A schematic diagram is highly recommended (see Figure)                                                                                                                                                                                               |
| Sample size          | 14  | Estimated number of participants needed to achieve study objectives and how it was determined, including clinical and statistical assumptions supporting any sample size calculations                                                                                                                                                                                          |
| Recruitment          | 15  | Strategies for achieving adequate participant enrolment to reach target sample size                                                                                                                                                                                                                                                                                            |

## Methods: Assignment of interventions (for controlled trials)

### Allocation:

|                     |     |                                                                                                                                                                                                                                                                                                                                                          |
|---------------------|-----|----------------------------------------------------------------------------------------------------------------------------------------------------------------------------------------------------------------------------------------------------------------------------------------------------------------------------------------------------------|
| Sequence generation | 16a | Method of generating the allocation sequence (eg, computer-generated random numbers), and list of any factors for stratification. To reduce predictability of a random sequence, details of any planned restriction (eg, blocking) should be provided in a separate document that is unavailable to those who enrol participants or assign interventions |
|---------------------|-----|----------------------------------------------------------------------------------------------------------------------------------------------------------------------------------------------------------------------------------------------------------------------------------------------------------------------------------------------------------|

|    |                |     |                                                                         |
|----|----------------|-----|-------------------------------------------------------------------------|
| 1  |                |     |                                                                         |
| 2  | Allocation     | 16b | Mechanism of implementing the allocation sequence (eg, central          |
| 3  | concealment    |     | telephone; sequentially numbered, opaque, sealed envelopes),            |
| 4  | mechanism      |     | describing any steps to conceal the sequence until interventions are    |
| 5  |                |     | assigned                                                                |
| 6  |                |     |                                                                         |
| 7  | Implementation | 16c | Who will generate the allocation sequence, who will enrol participants, |
| 8  |                |     | and who will assign participants to interventions                       |
| 9  |                |     |                                                                         |
| 10 | Blinding       | 17a | Who will be blinded after assignment to interventions (eg, trial        |
| 11 | (masking)      |     | participants, care providers, outcome assessors, data analysts), and    |
| 12 |                |     | how                                                                     |
| 13 |                | 17b | If blinded, circumstances under which unblinding is permissible, and    |
| 14 |                |     | procedure for revealing a participant's allocated intervention during   |
| 15 |                |     | the trial                                                               |
| 16 |                |     |                                                                         |
| 17 |                |     |                                                                         |
| 18 |                |     |                                                                         |
| 19 |                |     |                                                                         |

### Methods: Data collection, management, and analysis

|    |                 |     |                                                                          |
|----|-----------------|-----|--------------------------------------------------------------------------|
| 20 |                 |     |                                                                          |
| 21 | Data collection | 18a | Plans for assessment and collection of outcome, baseline, and other      |
| 22 | methods         |     | trial data, including any related processes to promote data quality (eg, |
| 23 |                 |     | duplicate measurements, training of assessors) and a description of      |
| 24 |                 |     | study instruments (eg, questionnaires, laboratory tests) along with      |
| 25 |                 |     | their reliability and validity, if known. Reference to where data        |
| 26 |                 |     | collection forms can be found, if not in the protocol                    |
| 27 |                 | 18b | Plans to promote participant retention and complete follow-up,           |
| 28 |                 |     | including list of any outcome data to be collected for participants who  |
| 29 |                 |     | discontinue or deviate from intervention protocols                       |
| 30 |                 |     |                                                                          |
| 31 | Data            | 19  | Plans for data entry, coding, security, and storage, including any       |
| 32 | management      |     | related processes to promote data quality (eg, double data entry;        |
| 33 |                 |     | range checks for data values). Reference to where details of data        |
| 34 |                 |     | management procedures can be found, if not in the protocol               |
| 35 |                 |     |                                                                          |
| 36 | Statistical     | 20a | Statistical methods for analysing primary and secondary outcomes.        |
| 37 | methods         |     | Reference to where other details of the statistical analysis plan can be |
| 38 |                 |     | found, if not in the protocol                                            |
| 39 |                 | 20b | Methods for any additional analyses (eg, subgroup and adjusted           |
| 40 |                 |     | analyses)                                                                |
| 41 |                 | 20c | Definition of analysis population relating to protocol non-adherence     |
| 42 |                 |     | (eg, as randomised analysis), and any statistical methods to handle      |
| 43 |                 |     | missing data (eg, multiple imputation)                                   |
| 44 |                 |     |                                                                          |
| 45 |                 |     |                                                                          |
| 46 |                 |     |                                                                          |
| 47 |                 |     |                                                                          |
| 48 |                 |     |                                                                          |
| 49 |                 |     |                                                                          |
| 50 |                 |     |                                                                          |
| 51 |                 |     |                                                                          |

### Methods: Monitoring

|    |                 |     |                                                                      |
|----|-----------------|-----|----------------------------------------------------------------------|
| 52 |                 |     |                                                                      |
| 53 | Data monitoring | 21a | Composition of data monitoring committee (DMC); summary of its role  |
| 54 |                 |     | and reporting structure; statement of whether it is independent from |
| 55 |                 |     | the sponsor and competing interests; and reference to where further  |
| 56 |                 |     | details about its charter can be found, if not in the protocol.      |
| 57 |                 |     | Alternatively, an explanation of why a DMC is not needed             |
| 58 |                 |     |                                                                      |
| 59 |                 |     |                                                                      |
| 60 |                 |     |                                                                      |

|    |          |     |                                                                        |
|----|----------|-----|------------------------------------------------------------------------|
| 1  |          | 21b | Description of any interim analyses and stopping guidelines, including |
| 2  |          |     | who will have access to these interim results and make the final       |
| 3  |          |     | decision to terminate the trial                                        |
| 4  |          |     |                                                                        |
| 5  |          |     |                                                                        |
| 6  | Harms    | 22  | Plans for collecting, assessing, reporting, and managing solicited and |
| 7  |          |     | spontaneously reported adverse events and other unintended effects     |
| 8  |          |     | of trial interventions or trial conduct                                |
| 9  |          |     |                                                                        |
| 10 |          |     |                                                                        |
| 11 | Auditing | 23  | Frequency and procedures for auditing trial conduct, if any, and       |
| 12 |          |     | whether the process will be independent from investigators and the     |
| 13 |          |     | sponsor                                                                |
| 14 |          |     |                                                                        |

### Ethics and dissemination

|    |                   |     |                                                                               |
|----|-------------------|-----|-------------------------------------------------------------------------------|
| 15 |                   |     |                                                                               |
| 16 |                   |     |                                                                               |
| 17 | Research ethics   | 24  | Plans for seeking research ethics committee/institutional review board        |
| 18 | approval          |     | (REC/IRB) approval                                                            |
| 19 |                   |     |                                                                               |
| 20 |                   |     |                                                                               |
| 21 | Protocol          | 25  | Plans for communicating important protocol modifications (eg,                 |
| 22 | amendments        |     | changes to eligibility criteria, outcomes, analyses) to relevant parties      |
| 23 |                   |     | (eg, investigators, REC/IRBs, trial participants, trial registries, journals, |
| 24 |                   |     | regulators)                                                                   |
| 25 |                   |     |                                                                               |
| 26 | Consent or assent | 26a | Who will obtain informed consent or assent from potential trial               |
| 27 |                   |     | participants or authorised surrogates, and how (see Item 32)                  |
| 28 |                   |     |                                                                               |
| 29 |                   | 26b | Additional consent provisions for collection and use of participant data      |
| 30 |                   |     | and biological specimens in ancillary studies, if applicable                  |
| 31 |                   |     |                                                                               |
| 32 |                   |     |                                                                               |
| 33 | Confidentiality   | 27  | How personal information about potential and enrolled participants will       |
| 34 |                   |     | be collected, shared, and maintained in order to protect confidentiality      |
| 35 |                   |     | before, during, and after the trial                                           |
| 36 |                   |     |                                                                               |
| 37 | Declaration of    | 28  | Financial and other competing interests for principal investigators for       |
| 38 | interests         |     | the overall trial and each study site                                         |
| 39 |                   |     |                                                                               |
| 40 |                   |     |                                                                               |
| 41 | Access to data    | 29  | Statement of who will have access to the final trial dataset, and             |
| 42 |                   |     | disclosure of contractual agreements that limit such access for               |
| 43 |                   |     | investigators                                                                 |
| 44 |                   |     |                                                                               |
| 45 | Ancillary and     | 30  | Provisions, if any, for ancillary and post-trial care, and for                |
| 46 | post-trial care   |     | compensation to those who suffer harm from trial participation                |
| 47 |                   |     |                                                                               |
| 48 | Dissemination     | 31a | Plans for investigators and sponsor to communicate trial results to           |
| 49 | policy            |     | participants, healthcare professionals, the public, and other relevant        |
| 50 |                   |     | groups (eg, via publication, reporting in results databases, or other         |
| 51 |                   |     | data sharing arrangements), including any publication restrictions            |
| 52 |                   |     |                                                                               |
| 53 |                   | 31b | Authorship eligibility guidelines and any intended use of professional        |
| 54 |                   |     | writers                                                                       |
| 55 |                   |     |                                                                               |
| 56 |                   |     |                                                                               |
| 57 |                   | 31c | Plans, if any, for granting public access to the full protocol, participant-  |
| 58 |                   |     | level dataset, and statistical code                                           |
| 59 |                   |     |                                                                               |
| 60 |                   |     |                                                                               |

**Appendices**

|                            |    |                                                                                                                                                                                                |
|----------------------------|----|------------------------------------------------------------------------------------------------------------------------------------------------------------------------------------------------|
| Informed consent materials | 32 | Model consent form and other related documentation given to participants and authorised surrogates                                                                                             |
| Biological specimens       | 33 | Plans for collection, laboratory evaluation, and storage of biological specimens for genetic or molecular analysis in the current trial and for future use in ancillary studies, if applicable |

---

\*It is strongly recommended that this checklist be read in conjunction with the SPIRIT 2013 Explanation & Elaboration for important clarification on the items. Amendments to the protocol should be tracked and dated. The SPIRIT checklist is copyrighted by the SPIRIT Group under the Creative Commons "[Attribution-NonCommercial-NoDerivs 3.0 Unported](#)" license.

For peer review only

# BMJ Open

## A Multicenter, Randomized Trial of Preterm Infants receiving Caffeine and Less Invasive Surfactant Administration Compared to Caffeine and Early Continuous Positive Airway Pressure (CaLI Trial): Study Protocol

|                                 |                                                                                                                                                                                                                                                                                                                                                                                                                                                                                                                                                                                                                                                                                                                                                  |
|---------------------------------|--------------------------------------------------------------------------------------------------------------------------------------------------------------------------------------------------------------------------------------------------------------------------------------------------------------------------------------------------------------------------------------------------------------------------------------------------------------------------------------------------------------------------------------------------------------------------------------------------------------------------------------------------------------------------------------------------------------------------------------------------|
| Journal:                        | <i>BMJ Open</i>                                                                                                                                                                                                                                                                                                                                                                                                                                                                                                                                                                                                                                                                                                                                  |
| Manuscript ID                   | bmjopen-2020-038343.R3                                                                                                                                                                                                                                                                                                                                                                                                                                                                                                                                                                                                                                                                                                                           |
| Article Type:                   | Protocol                                                                                                                                                                                                                                                                                                                                                                                                                                                                                                                                                                                                                                                                                                                                         |
| Date Submitted by the Author:   | 23-Dec-2020                                                                                                                                                                                                                                                                                                                                                                                                                                                                                                                                                                                                                                                                                                                                      |
| Complete List of Authors:       | Ines, Felix; Sharp Mary Birch Hospital for Women and Newborns, Neonatal Research Institute<br>Hutson, Shandee; Sharp Mary Birch Hospital for Women and Newborns<br>Coughlin, Katherine; Sharp Mary Birch Hospital for Women and Newborns<br>Hopper, Andrew; Loma Linda University Medical Center<br>Banerji, Anamika; Loma Linda University Medical Center<br>Uy, Cherry; University of California Irvine<br>Finer, Neil; University of California San Diego<br>Rich, Wade; Sharp Mary Birch Hospital for Women and Newborns<br>Morales, Ana; Sharp Mary Birch Hospital for Women and Newborns<br>Steen, Jane; Sharp Mary Birch Hospital for Women and Newborns<br>Katheria, Anup; Sharp Mary Birch Hospital for Women and Newborns, Neonatology |
| <b>Primary Subject Heading</b>: | Paediatrics                                                                                                                                                                                                                                                                                                                                                                                                                                                                                                                                                                                                                                                                                                                                      |
| Secondary Subject Heading:      | Paediatrics                                                                                                                                                                                                                                                                                                                                                                                                                                                                                                                                                                                                                                                                                                                                      |
| Keywords:                       | Neonatal intensive & critical care < INTENSIVE & CRITICAL CARE, NEONATOLOGY, RESPIRATORY MEDICINE (see Thoracic Medicine)                                                                                                                                                                                                                                                                                                                                                                                                                                                                                                                                                                                                                        |
|                                 |                                                                                                                                                                                                                                                                                                                                                                                                                                                                                                                                                                                                                                                                                                                                                  |

SCHOLARONE™  
Manuscripts



I, the Submitting Author has the right to grant and does grant on behalf of all authors of the Work (as defined in the below author licence), an exclusive licence and/or a non-exclusive licence for contributions from authors who are: i) UK Crown employees; ii) where BMJ has agreed a CC-BY licence shall apply, and/or iii) in accordance with the terms applicable for US Federal Government officers or employees acting as part of their official duties; on a worldwide, perpetual, irrevocable, royalty-free basis to BMJ Publishing Group Ltd ("BMJ") its licensees and where the relevant Journal is co-owned by BMJ to the co-owners of the Journal, to publish the Work in this journal and any other BMJ products and to exploit all rights, as set out in our [licence](#).

The Submitting Author accepts and understands that any supply made under these terms is made by BMJ to the Submitting Author unless you are acting as an employee on behalf of your employer or a postgraduate student of an affiliated institution which is paying any applicable article publishing charge ("APC") for Open Access articles. Where the Submitting Author wishes to make the Work available on an Open Access basis (and intends to pay the relevant APC), the terms of reuse of such Open Access shall be governed by a Creative Commons licence – details of these licences and which [Creative Commons](#) licence will apply to this Work are set out in our licence referred to above.

Other than as permitted in any relevant BMJ Author's Self Archiving Policies, I confirm this Work has not been accepted for publication elsewhere, is not being considered for publication elsewhere and does not duplicate material already published. I confirm all authors consent to publication of this Work and authorise the granting of this licence.

1  
2  
3 **A Multicenter, Randomized Trial of Preterm Infants receiving Caffeine and Less Invasive**  
4 **Surfactant Administration Compared to Caffeine and Early Continuous Positive Airway**  
5 **Pressure (CaLI Trial): Study Protocol**  
6  
7  
8

9  
10 Felix Ines, Shandee Hutson, Katherine Coughlin, Andrew Hopper, Anamika Banerji, Cherry Uy,  
11  
12 Neil Finer, Wade Rich, Ana Morales, Jane Steen, Anup Katheria\*  
13

14  
15  
16 Neonatal Research Institute, Sharp Mary Birch Hospital for Women & Newborns, San Diego,  
17  
18 CA, United States.  
19

20  
21  
22  
23 Loma Linda University Medical Center, Loma Linda, CA, United States.  
24

25  
26  
27  
28 University of California Irvine Medical Center, Irvine, CA, United States.  
29

30  
31  
32 Corresponding author: Anup Katheria M.D., Neonatal Research Institute, Sharp Mary Birch  
33  
34 Hospital for Women & Newborns, San Diego, CA, United States. Email:  
35  
36 Anup.Katheria@sharp.com  
37  
38  
39  
40  
41  
42  
43  
44  
45  
46  
47  
48  
49  
50  
51  
52  
53  
54  
55  
56  
57

## ABSTRACT

**Introduction:** Respiratory Distress Syndrome (RDS) or surfactant deficiency occurs primarily in premature infants resulting in composite outcomes of death or bronchopulmonary dysplasia.

Initial management strategies for preterm infants with RDS includes early initiation of continuous positive airway pressure (CPAP) and titration of  $\text{FiO}_2$ , and may include the use of less invasive surfactant administration (LISA) to avoid the need for mechanical ventilation. In order to optimize success of non-invasive support, the use of early caffeine therapy may be critical to the success of LISA. The objective of our trial is to evaluate whether of infants that receive early caffeine, CPAP, and surfactant via the LISA method compared to infants that receive caffeine and CPAP alone, have a decreased need for invasive mechanical ventilation in the first 72 hours of life.

**Methods and analysis:** CaLI is an unblinded multicenter, randomized controlled, trial of 180 preterm infants (24+0 – 29+6 weeks CGA). Criteria for intubation/treatment failure will be recent guidelines for the management of RDS, including: 1) CPAP level of 6-8 cmH<sub>2</sub>O and  $\text{FiO}_2$  >0.40 required to maintain saturations 90%-95% for 2 hours after randomization; 2) a pH of 7.15 or less or a  $\text{paCO}_2$  >65 mmHg on any (2) blood gases (arterial/capillary/or venous) at least 2 hours after randomization and in the first 72 hours of life; 3) continued Apnea/Bradycardia/Desaturation events despite nasal intermittent minute ventilation (NIMV) mode of ventilation.

Infants w will be randomized by 1 hour of life and Caffeine/Lisa treatments by by 2 hours of life. Caffeine will be administered soon after randomization in both arms, prior to surfactant in the LISA arm and before 2 hours of life in the control arm.



**Ethics and Dissemination:** Chiesi Farmaceutici, S.p.A is the sponsor of CaLI. Ethical approval has been obtained. Results will be submitted for publication in peer reviewed journals.

**Clinical Trial Registration:** www.Clinicaltrials.gov: NCT04209946

#### **STRENGTHS AND LIMITATIONS OF THIS TRIAL ARE:**

- Limited power for longer term outcomes such as BPD and neurodevelopmental impairment due its smaller size
- CaLI is not a double blind trial due to the complexity of blinding treatments in the delivery room with different modes of administration and the need to initial the trial very rapidly after birth.
- The trial is the first to be prescriptive in the use of caffeine as a co-intervention for LISA administration to test its benefit
- This study will be the most recent in many years to re-study the use of early surfactant with the LISA method compared to expectant management with CPAP alone.

#### **INTRODUCTION**

Premature infants are commonly born with respiratory distress syndrome (RDS) or surfactant deficiency that may lead into respiratory failure. Advances in respiratory management includes, early initiation of continuous positive airway pressure (CPAP) and titration of FiO<sub>2</sub>,<sup>1</sup> modifications in the administration of surfactant therapy using less invasive techniques, and the avoidance of mechanical ventilation.<sup>2</sup> Other strategies to optimize success of non-invasive support involves the use of caffeine therapy to serve as a respiratory stimulant. Dekker et al

1  
2  
3 demonstrated that the administration of caffeine in the delivery room compared to upon  
4 admission to the NICU produced greater minute ventilation and tidal volumes in premature  
5 infants <30 weeks.<sup>3</sup> The less invasive surfactant administration (LISA) to spontaneously  
6 breathing preterm infants has been reported to reduce the need for mechanical ventilation.<sup>4</sup> A  
7 recent meta-analysis of non-invasive ventilation strategies demonstrated that Less Invasive  
8 Surfactant Administration (LISA) had the lowest odd ratio (OR, 0.49; 95% CI 0.3-0.79) for the  
9 development of the composite outcome of death or bronchopulmonary dysplasia amongst non-  
10 invasive ventilation strategies compared to invasive mechanical ventilation.<sup>5</sup> The combination of  
11 early Caffeine and LISA has not been tested and despite these results and studies showing it  
12 decreased the need for invasive mechanical ventilation compared to Continuous Positive Airway  
13 Pressure, the use of the LISA method in the United States and countries such as England.<sup>6,7</sup>

## 30 **METHODS AND ANALYSIS**

31  
32 The study is designed as a multicenter, un-blinded, randomized trial of preterm infants receiving  
33 Caffeine and Less Invasive Surfactant Administration compared to Caffeine and CPAP with a  
34 primary outcome of frequency of subject endotracheal intubation between the two groups  
35 (Caffeine and LISA vs Caffeine and CPAP) within the first 72 hours of life. The study will be  
36 conducted at 3 sites in the United States (Loma Linda University Medical Center, University of  
37 California, Irvine, and Sharp Mary Birch Hospital for Women & Newborns) over a 3 year  
38 period. The following variables will be collected:

- 39 1. Frequency of subjects requiring endotracheal intubation between the two groups (LISA  
40 vs CPAP) in the first 72 hours of life
- 41 2. Duration of mechanical ventilation and/or CPAP
- 42 3. Requirement of supplemental oxygen at 36 weeks corrected age

- 1
- 2
- 3 4. Grade III and IV intraventricular hemorrhage
- 4
- 5 5. Spontaneous intestinal perforation
- 6
- 7 6. Necrotizing Enterocolitis
- 8
- 9
- 10 7. Retinopathy of prematurity requiring surgery
- 11
- 12 8. Need for repeat surfactant dosing
- 13
- 14 9. Long term neurodevelopmental data through 2 years of age.
- 15

16 Pregnant women will be identified and screened from the labor and delivery floor (LD) or  
17 perinatal special care unit (PSCU) at each site. Parents will be approached and consented prior to  
18 delivery. In the delivery room, after the infant's first five minutes of life, the research staff or  
19 neonatal delivery team will open the randomization envelope for the proper gestational age (GA)  
20 group. Multiples will be randomized to the same treatment group for ease of consent and family  
21 considerations. There is no crossover allowed between the LISA and CPAP groups, subjects  
22 should receive their randomized treatment. If the physician determines that the infant requires  
23 intubation or is determined to be unstable within the first five minutes of life, the infant will be  
24 intubated and excluded from the study.

#### 25 26 27 28 29 30 31 32 33 34 35 36 37 38 **Inclusion Criteria:**

- 39
- 40 • Premature infants born at 24-29+6 weeks gestational age
- 41
- 42 • Informed consent obtained (antenatal)
- 43
- 44 • Infant is spontaneously breathing on CPAP of 5-8 cmH<sub>2</sub>O with an FiO<sub>2</sub> of <.40 and
- 45 maintains a normal heart rate (HR>100 Bpm)
- 46
- 47
- 48
- 49

#### 50 **Exclusion Criteria:**

- 51
- 52 • Declined consent
- 53
- 54 • Infants with known congenital anomalies
- 55
- 56
- 57

- Requiring intubation in the delivery room

All infants found to have anomalies post-randomization will be analyzed by intent to treat principle.

**Patient Allocation:** Randomization cards are computer-generated by Sharp Mary Birch Hospital for Women & Newborns and will solely be known by the data manager. Each randomization card contains group assignment, real-time data information, and a randomization number, sealed in an opaque envelope with a label that indicates the envelope sequence number, site (facility) number, and stratification by gestational age. These envelopes will be logged by the data manager in a secured data file and then distributed to each research facility. We will enroll 180 preterm infants and will stratify by gestational age (24-26+6 weeks and 27+0-29+6 weeks), labeled as such on each opaque envelope.

**Randomization:**

In order to allow for initial stabilization on CPAP, infants will be randomized by 1 hour of life. If the providers have not intubated or plan to intubate the infant in the delivery room, consented infants that are assessed by a provider as clinically stable (i.e. HR >100 bpm) and spontaneously breathing on CPAP (5-8 cm H<sub>2</sub>O) will be randomized. Stabilization of premature infants at delivery may include stimulation, positive pressure ventilation or CPAP. Only spontaneously breathing infants on CPAP, maintaining normal heart rate and saturations will be included and randomized. When the neonatal provider assesses the infant to be stable on CPAP, a member of the research or neonatal team will pull a randomization card according to the infant's corrected gestational age. Once the treatment group is identified (Caffeine and LISA or Caffeine and CPAP), intervention will immediately commence.

**LISA Group:**

For infants randomized to LISA, an intravenous access will be established to administer caffeine.

We will have an orogastric tube placed into the stomach prior to laryngoscopy and the contents aspirated before and after the procedure to document any esophageal surfactant administration.

Thereafter, a thin catheter (16G angiocatheter) will be measured and the depth of insertion will be marked with intubation tape. The thin catheter will then be placed in the trachea under direct or video-laryngoscopy by a neonatal practitioner. After the catheter is placed, the laryngoscope will be removed, the angiocatheter held securely in place, and the infant allowed to spontaneously breathe on CPAP. Surfactant (Curosurf 2.5 mL/kg, based on estimated fetal weight) will be slowly administered over 1-2 minutes (approximately in 3 aliquots) assuring synchronized instillation with infant's breathing pattern while on CPAP. After instillation, the catheter will be immediately removed and CPAP will continue. If apnea occurs during or after the procedure, positive pressure ventilation will be initiated. To improve adherence to protocol interventions, all sites have agreed on using senior level physicians or neonatal practitioners that have prior experience with the LISA method.

Data collection in the LISA group is collected using the Caffeine and LISA Randomization card. (Supplemental file 1)

**CPAP Group:**

In adherence to protocol interventions, infants randomized to early CPAP will be managed according to sub-site unit practice for preterm infants on CPAP. If randomized to the CPAP group, an intravenous access will be established to administer caffeine and the infant will continue on CPAP unless infant meets failure criteria and requires intubation.

1  
2  
3 Data collection in the CPAP group is collected using the Caffeine and CPAP Randomization  
4 card (Supplemental file 2)

5  
6  
7 **Caffeine:**

8  
9 Caffeine will be given in both groups as soon as IV access is obtained. Since caffeine must be  
10 given prior to the LISA procedure it must be given as early as possible but 2 hours of birth.

11  
12 Similarly, if randomized to CPAP, caffeine will be given soon after birth. If infants in the CPAP  
13 group meet intubation criteria, and the loading dose of caffeine has not been administered, to  
14 avoid any delay in intubation, caffeine will be given no later than thirty minutes after intubation.

15  
16 The caffeine preparation for this study is caffeine citrate with a loading dose of 20 mg/kg given  
17 via an intravenous access over 15-30 minutes. Time of caffeine administration will be captured  
18 in subject's Electronic Medical Records (EMR).

19  
20  
21  
22  
23  
24  
25  
26  
27  
28  
29 **Blinding:**

30  
31 Due to the nature of the intervention neither participants nor staff can be blinded to allocation,  
32 but are strongly encouraged not to disclose the allocation status of the participant at the follow up  
33 assessments.

34  
35 As a pragmatic design we realize that a separate research team would not always be able to be  
36 present for the randomization and intervention. Therefore, the clinical team caring for the infant  
37 will follow strict guidelines for intubation and management of infants to reduce any post-  
38 randomization bias (see below)

39  
40  
41  
42  
43  
44  
45  
46  
47  
48  
49  
50  
51 **Intubation criteria:**

52  
53 As an un-blinded trial, it is critical that both groups are standardized to avoid bias towards one  
54 arm for mechanical ventilation/treatment failure. Therefore, strict delivery room/ NICU criteria

1  
2  
3 will be used. Furthermore, infants cannot be randomized before 5 minutes of life to ensure that  
4  
5 unstable infants that cannot be transitioned on CPAP would not be included. These would  
6  
7 include infants that need intubation as specified in the Neonatal Resuscitation Program (NRP)  
8  
9 guidelines and such as: **1)** when chest compressions are needed; **2)** ineffective ventilation  
10  
11 (inability to obtain good chest rise and fall despite implementation of the corrective ventilation  
12  
13 steps: Mask adjustment; Reposition airway [try again]; Suction mouth and nose; Open mouth  
14  
15 [try again]; Pressure increase [up to 40 cm H<sub>2</sub>O pressure]; Airway alternative; (MRSOPA), as  
16  
17 indicated by the NRP guidelines to obtain effective ventilation); **3)** prolonged PPV (infants  
18  
19 requiring positive pressure ventilation for more than 2 minutes in order to maintain HR >100  
20  
21 BpM); or **4)** prolonged hypoxia (pre-ductal SpO<sub>2</sub> is not met despite 100% oxygen supplements  
22  
23 and resuscitation interventions). Randomization should be delayed until the providers are  
24  
25 comfortable that none of these criteria are met in order to avoid any early selection bias.  
26  
27

28  
29  
30 After stabilization on CPAP infants can be randomized. Criteria for intubation/treatment failure  
31  
32 will be recent guidelines for the management of RDS,<sup>1</sup> including: 1) CPAP level of 6-8 cmH<sub>2</sub>O  
33  
34 and FiO<sub>2</sub> >0.40 required to maintain saturations 90%-95% for 2 hour after randomization; 2) a  
35  
36 pH of 7.15 or less or a paCO<sub>2</sub> >65 mmHg on any (2) blood gases (arterial/capillary/or venous) at  
37  
38 least 2 hours after randomization and in the first 72 hours of life; 3) continued  
39  
40

41  
42 Apnea/Bradycardia/Desaturation events despite nasal intermittent minute ventilation (NIMV)  
43  
44 mode of ventilation. To avoid the bias of withheld ventilation since the study is not masked,  
45  
46 infants with these criteria will be regarded as treatment failures.  
47

48  
49 For pragmatic purpose sites will be able to use their standard approach for non-invasive  
50  
51 ventilation as they have agreed to use each mode (NCPAP or NIMV) equally regardless of  
52  
53 randomization. Subsequent analysis will include primary mode of non-invasive ventilation.  
54

55  
56 Data collection on intubation will be collected using the Intubation card (Supplemental file 3)  
57

1  
2  
3  
4  
5 **Participant Timeline:** To indicate participant timeline between the Caffeine and LISA  
6  
7 procedure vs the Caffeine and CPAP procedure, [CaLI Study Overview Diagram]  
8  
9  
10 (Supplementary Appendix I) is attached.  
11  
12

13  
14 **Patient and Public Involvement:**  
15

16  
17 We have collaborated with parents by presenting this study to the Sharp Mary Birch Parent  
18  
19 Advisory Board. Based on their experiences and preferences, we have incorporated their  
20  
21 suggestions and they enthusiastically support the study. One of the parents has agreed to be on the  
22  
23 DSMB to monitor the trial for safety. Their involvement includes input on the consent form and  
24  
25 perspective on the means of recruitment to the study.  
26  
27  
28  
29  
30

31  
32 **Study Overview Diagram:** (Supplemental File 4)  
33  
34  
35

36 **Data Management and Collection:**  
37

38  
39 Data will be managed using REDCap electronic data capture tools hosted and managed at Sharp  
40  
41 Mary Birch Hospital for Women & Newborns. All collected variables are listed in the data report  
42  
43 form, (DRF forms): LISA Data Collection (supplemental file 1), CPAP arm Delivery Room Data  
44  
45 Collection (supplemental file 2), and CaLI Intubation Data Collection (supplemental file 3).  
46  
47  
48 Loma Linda University Medical Center, University of California Irvine Medical Center, and  
49  
50 Sharp Mary Birch Hospital for Women & Newborns have extensive experience with REDCap  
51  
52 data entry.  
53  
54  
55  
56  
57



1  
2  
3 Randomization cards are also utilized as data collection forms, with pertinent information  
4  
5 completed and signed by care providers in real-time. To maintain integrity of the study data, site  
6  
7 Data Coordinators will enter data information into REDCap and verified by the primary site Data  
8  
9 coordinator and Research Coordinator prior to locking the subject's electronic data file.  
10  
11

### 12 13 14 **Data and safety monitoring plan:**

15  
16 An independent, well recognized, data safety monitoring board (DSMB) with experience with  
17  
18 respiratory trials is chosen for this study. Drs. Brad Yoder and Wally Carlo have led and  
19  
20 participated in a number of trials including: High-Flow Nasal Cannula, High Frequency  
21  
22 Ventilation, and Surfactant. In addition, a former parent that has participated in research trials  
23  
24 Kirsten Norman has agreed to serve on the DSMB. The DSMB will: 1) oversee the safety data  
25  
26 on all study patients, 2) safeguard the interests of all study patients, 3) monitor the overall  
27  
28 conduct of the trial, 4) advise the investigators in order to protect the integrity of the trial, and 5)  
29  
30 supervise the conduct and analysis of all interim analyses. To this end, the DSMB will receive  
31  
32 monthly reports from the trial on any injuries or adverse events, any developments that  
33  
34 jeopardize the continued success of the trial, and data by which to accomplish the evaluation of  
35  
36 predetermined early stopping rules. All SAEs, protocol deviations, non-serious adverse events  
37  
38 (AEs), and unanticipated problems (UPs) will be reported to the Data Coordinating Center  
39  
40 (DCC) and forwarded to the DSMB if indicated (see below). Reports of adverse events and  
41  
42 recruitment will be sent monthly and demographics will be included with the interim and final  
43  
44 safety and efficacy analyses. Interim analyses determined by the DSMB and the project  
45  
46 statistician will be conducted independently from the trial leadership and staff. The definitions  
47  
48 and reporting process are as follows:  
49  
50  
51  
52  
53  
54  
55  
56  
57

1  
2  
3 Serious Adverse Events defined as one or more of the following: decompensation during the  
4 administration of surfactant in either arm including the use of epinephrine in the delivery room  
5 and chest compressions, or death prior to discharge.  
6  
7  
8

- 9 1. All SAEs will be reported within 72 hours of discovery of event, to the PI and the site  
10 IRB.  
11
- 12 2. Any Unexpected AE or Serious Deviation will be reported within 7 days of discovery of  
13 event to the Data Coordinating Center.  
14  
15  
16  
17  
18  
19  
20

## 21 Non-Serious Events

22 Unexpected events that are Non-Serious are reported not more than 14 days after the PI first  
23 learns of the event. The DCC will forward all non-serious unexpected events to the DSMB, and  
24 main study PI. All other expected outcomes of prematurity, i.e. BPD, IVH grades 1-4, ROP,  
25 NEC, will be collected in the electronic database and reviewed in interim reports. We have  
26 appointed a DSMB to work closely with the main study PI. There are no conflicts of interest with  
27 these individuals, who are not research collaborators of, and are at separate institutions from the  
28 investigators at the enrolling sites.  
29  
30  
31  
32  
33  
34  
35  
36  
37  
38

39 The study will be closely monitored for issues of data quality, study conduct, and adverse events.  
40 These analyses will be presented to the DSMB. Interim analyses will seek to identify results that  
41 are sufficiently extreme and precise, this is to offset the goal of obtaining additional data that  
42 might lead to more precise and perhaps less exaggerated and more convincing results, as well as  
43 information about differences in treatment effect by subgroups of patients. Determinations on  
44 stopping must reflect ethical considerations of the impact of interim results on clinical equipoise  
45 as well as considerations on the potential impact (or lack of impact) of interim results on clinical  
46  
47  
48  
49  
50  
51  
52  
53  
54  
55  
56  
57

1  
2  
3 practice. The superiority must be tested in the context of this trial first and then superiority  
4  
5 assessed, unless the DSMB is ethically motivated to stop the trial for superiority.  
6  
7  
8  
9

### 10 **Statistical Analysis Plan:**

11  
12 A chart review of the databases at Sharp Mary Birch has shown that approximately 49% of our  
13  
14 infants 24-29+6 weeks' gestation were intubated and mechanically ventilated after 5 minutes of  
15  
16 life but within the first 72 hours of life. Therefore, a very conservative sample size calculation  
17  
18 indicates that in order to detect a 22% absolute reduction (a reduction from 49% to 27%) we  
19  
20 would need at least 75 subjects in each arm for an 80% power and a p-value of less than 0.05 for  
21  
22 significance. An adjustment of 1.12 derived from the NICHD Neonatal Research Network  
23  
24 Generic Database, allowed for multiples to be randomized to the same treatment introducing a  
25  
26 clustering effect.<sup>8</sup> In order to account for multiples and potential drop out of subjects we plan to  
27  
28 consent 90 subjects in each arm (180 subjects total). A future detailed statistical analysis plan  
29  
30 will be made available prior to completion of the trial.  
31  
32  
33  
34  
35  
36

### 37 **ETHICS AND DISSEMINATION**

38  
39  
40 Ethics approval has been obtained. Prior to any research procedure, consent will be obtained by  
41  
42 the primary investigator or a delegated sub-investigator or a research associate. The mother, or  
43  
44 legally authorized representative must sign the informed consent document. Mother (or surrogate  
45  
46 mother) must sign a HIPAA authorization providing access to her medical records for collection of  
47  
48 maternal data. Either mother or father or legal guardian can sign a HIPAA authorization providing  
49  
50 access to the child's medical record for data collection purposes. The subject's legally authorized  
51  
52 representatives will be given ample time to read the informed consent, ask questions of the research  
53  
54  
55  
56  
57

1  
2  
3 team, and discuss the study with their family and/or the subject's physician. The informed consent  
4  
5 process will be documented in the electronic medical record and copies of the signed and dated  
6  
7 consent will be given to the subject's representatives, placed in the subject's physical chart, and  
8  
9 stored in a locked cabinet in the offices of the Neonatal Research Institute. Results will be  
10  
11 published and presented at the Pediatric Academic Societies meeting upon completion. Any  
12  
13 important protocol modifications will be communicated to sub-site lead investigators via secured  
14  
15 email which will include automated confirmation of receipt and recorded audio/visual meetings.  
16  
17

### 18 **Confidentiality:**

19  
20  
21 All data will be safeguarded in accordance with the Health Insurance Portability and  
22  
23 Accountability Act (HIPAA) and the principles and practices of strict confidentiality. Data will  
24  
25 be maintained by numerical code rather than personal identifiers and computer-based files will  
26  
27 be available only to persons involved in the study through the use of access privileges and  
28  
29 passwords. All local databases will be secured with password-protected access systems. Forms,  
30  
31 lists, logbooks, appointment books, and any other listings that link participant ID numbers to  
32  
33 other identifying information will be stored in a separate, locked file in an area with limited  
34  
35 access.  
36  
37  
38  
39  
40

### 41 **Protection against Risk:**

42  
43  
44 Only research team members (with appropriate research training relevant to protection of human  
45  
46 subjects) shall have access to the project's databases. The final trial data set will remain with the  
47  
48 lead PI and DCC.  
49  
50

## 51 **APPENDIX II**

52  
53  
54 Informed Consent Form (Supplementary Appendix II)  
55  
56  
57

**Abbreviations (in alphabetical order)**

BPD = Bronchopulmonary Dysplasia (supplemental O2 at 36 weeks CGA)

Bpm = beats per minute

BSID-4= Bayley Scales of Infant and Toddler Development 4<sup>th</sup> ed

CPAP = Continuous Positive Airway Pressure

LISA = Less Invasive Surfactant Administration

NCPAP = Nasal Continuous Positive Airway Pressure

NICU=Neonatal Intensive Care Unit

NIMV = Nasal Intermittent Minute Ventilation

PPV = positive pressure ventilation with bag & mask

RDS= Respiratory Distress Syndrome

ROP= Retinopathy of Prematurity

SMBHWN= Sharp Mary Birch Hospital for Women & Newborns

LLU= Loma Linda University Medical Center

UCI= University of California Irvine Medical Center

**PRINCIPAL INVESTIGATORS**

Anup Katheria MD, Sharp Mary Birch Hospital for Women & Newborns, San Diego, CA, USA

Shandee Hutson MD, Sharp Mary Birch Hospital for Women & Newborns, San Diego, CA, USA

Andrew Hopper, MD, Loma Linda University Medical Center, Loma Linda, CA, USA

Anamika Banerji, MD, Loma Linda University Medical Center, Loma Linda, CA, USA

Cherry Uy MD, University of California Irvine, Irvine, CA, USA

Neil Finer MD, Sharp Mary Birch Hospital for Women & Newborns, San Diego, CA, USA

## Statistician

Debra Poeltler, PhD, Sharp Mary Birch Hospital for Women & Newborns, San Diego, CA, USA

## FUNDING STATEMENT

A grant to support the CaLI trial has been obtained from Chiesi Farmaceutici, S.p.A and with this financial support, the primary study site maintains ultimate authority overall study activities.

**Chiesi Grant #:** CRTX-GR-717

## COMPETING INTERESTS

The Principal Investigator for the overall trial and each study site declare no financial or other competing interests.

## CONTRIBUTORSHIP STATEMENT

**FI and AK developed the initial protocol and manuscript. SH, KC, AH, AB, CU, NF, WR helped revise the manuscript and protocol. AM and JS helped develop the dataset and variables for the manuscript.**

## REFERENCES:

1. Sweet DG, Carnielli V, Greisen G, et al. European Consensus Guidelines on the Management of Respiratory Distress Syndrome - 2019 Update. *Neonatology* 2019;115(4):432-50. doi: 10.1159/000499361 [published Online First: 2019/04/12]
2. Kribs A, Roll C, Gopel W, et al. Nonintubated Surfactant Application vs Conventional Therapy in Extremely Preterm Infants: A Randomized Clinical Trial. *JAMA pediatrics* 2015;169(8):723-30. doi: 10.1001/jamapediatrics.2015.0504 [published Online First: 2015/06/09]

- 1  
2  
3 3. Dekker J, Hooper SB, van Vonderen JJ, et al. Caffeine to improve breathing effort of preterm infants at  
4 birth: a randomized controlled trial. *Pediatric research* 2017;82(2):290-96. doi:  
5 10.1038/pr.2017.45 [published Online First: 2017/03/14]
- 6  
7 4. Gopel W, Kribs A, Ziegler A, et al. Avoidance of mechanical ventilation by surfactant treatment of  
8 spontaneously breathing preterm infants (AMV): an open-label, randomised, controlled trial.  
9 *Lancet (London, England)* 2011;378(9803):1627-34. doi: 10.1016/s0140-6736(11)60986-0  
10 [published Online First: 2011/10/04]
- 11  
12 5. Isayama T, Iwami H, McDonald S, et al. Association of Noninvasive Ventilation Strategies With  
13 Mortality and Bronchopulmonary Dysplasia Among Preterm Infants: A Systematic Review and  
14 Meta-analysis. *JAMA : the journal of the American Medical Association* 2016;316(6):611-24. doi:  
15 10.1001/jama.2016.10708 [published Online First: 2016/08/18]
- 16  
17 6. Kurepa D, Perveen S, Lipener Y, et al. The use of less invasive surfactant administration (LISA) in the  
18 United States with review of the literature. *Journal of perinatology : official journal of the*  
19 *California Perinatal Association* 2019;39(3):426-32. doi: 10.1038/s41372-018-0302-9 [published  
20 Online First: 2019/01/13]
- 21  
22 7. Bhayat S, Kaur A, Premadeva I, et al. Survey of less Invasive Surfactant Administration in England, slow  
23 adoption and variable practice. *Acta Paediatrica* 2020;109(3):505-10. doi:  
24 <https://doi.org/10.1111/apa.14995>
- 25  
26 8. Finer NN, Carlo WA, Walsh MC, et al. Early CPAP versus surfactant in extremely preterm infants. *The*  
27 *New England journal of medicine* 2010;362(21):1970-9. doi: 10.1056/NEJMoa0911783  
28 [published Online First: 2010/05/18]
- 29  
30  
31  
32  
33  
34  
35  
36  
37  
38  
39  
40  
41  
42  
43  
44  
45  
46  
47  
48  
49  
50  
51  
52  
53  
54  
55  
56  
57

# CALI Study Randomization Card

Treatment: **LISA & Caffeine**

Subject ID: \_\_\_\_\_ Site #: \_\_\_\_\_

Date/time of Randomization: \_\_\_\_/\_\_\_\_/\_\_\_\_ : \_\_\_\_:\_\_\_\_  
MM / DD / YYYY HH : MM

**PLEASE REFER ON BACK OF CARD FOR LISA PROCEDURAL CHECKLIST**

FiO2: \_\_\_\_\_ CPAP: \_\_\_\_\_ SpO2: \_\_\_\_\_ HR: \_\_\_\_\_ at randomization

|                                                                                                 |                                                                                                 |
|-------------------------------------------------------------------------------------------------|-------------------------------------------------------------------------------------------------|
| 1. Caffeine Therapy started in LDR/Resuscitation Rm?                                            | <input type="checkbox"/> Yes <input type="checkbox"/> No                                        |
| 2. Start time of LISA (from Laryngoscopy attempt)                                               | Time: ____:____<br>HH : MM                                                                      |
| 3. Duration of Laryngoscopy attempt? (Time of insertion to removal)                             | 1 <sup>st</sup> _____ seconds<br>2 <sup>nd</sup> _____ seconds<br>3 <sup>rd</sup> _____ seconds |
| 4. Successful placement of LISA catheter?                                                       | <input type="checkbox"/> Yes <input type="checkbox"/> No                                        |
| 5. Total surfactant administered (2.5 mL/kg)                                                    | _____ mLs                                                                                       |
| 6. End time of LISA (removal of angiocatheter)                                                  | Time: ____:____<br>HH : MM                                                                      |
| 7. Surfactant aspirated from stomach or leaked from mouth (failure/regurgitation from trachea)? | <input type="checkbox"/> Yes <input type="checkbox"/> No                                        |
| 8. Amount surfactant aspirated?                                                                 | _____ mLs                                                                                       |
| 9. Lowest HR during procedure?                                                                  | _____ Bpm                                                                                       |
| 10. Lowest SpO2 during procedure?                                                               | _____ %                                                                                         |
| 11. Interventions?                                                                              | Notes:                                                                                          |

**Affix patient label to back of this card**

Completed By (Name): \_\_\_\_\_ Date: \_\_\_\_/\_\_\_\_/\_\_\_\_ Peer review only - <http://bmjopen.bmj.com/site/about/guidelines.xhtml>



1 **Supplies for LISA procedure:**

2 ○ 16g angiocatheter, measured and marked insertion length with tape or

3 Sharpie, NEEDLE REMOVED

4

5 ○ Laryngoscope size:  00  0

6 ○ Laryngoscope type:  Video  Conventional

7 ○ Curosurf 2.5 mL/kg/dose in syringe

8 ○ 8 FR feeding tube and compatible syringe

9 ○ 2- 10 mL syringe

10 ○ Blunt plastic needle

11 ○ 7 inch IV small bore extension tubing

---

12 **PROCEDURE:**

13 ○ At randomization infant will be on CPAP

14 ○ Infant will be positioned in a “sniffing position”

15 ○ An 8 FR orogastric (OG) tube will be placed and gastric contents aspirated.

16 OG tube should remain in place during the LISA procedure

17

18 ○ Ensure adequate CPAP and Vital Signs (VS) stable

19 ○ Place IV for IV Caffeine loading dose

20 ○ Obtain 16 gauge catheter and **remove needle**

21 ○ Measure depth of catheter insertion using clean technique (6 + wt in Kg)

22 mark with a small piece of intubation tape or sharpie

23

24 ○ Provider visualizes vocal cords, inserts & stabilizes angiocatheter

25 ○ RCP attaches 7 inch IV small bore extension tubing to angiocatheter

26 ○ RCP attaches syringe with Curosurf to the extension tubing

27 ○ RCP slowly administers Curosurf over 1-2 minutes (approximately in 3

28 aliquots) while infant is spontaneously breathing on CPAP

29 ○ RCP will flush angiocath with 5 mLs of air to clear surfactant from

30 angiocatheter

31

32 ○ Provider will remove angiocatheter and infant will continue on CPAP

33 therapy

34 ○ Wean FiO2 as tolerated

35

36 **If infant requires intubation within 72 hours, Please complete Intubation**

37 **Card and call Neonatal Research at x6307**

For peer review only

39 Sharp Mary Birch Hospital for Women & Newborns. (2020). CaLI Study Randomization Card. v1.0

40 (Supplemental File 1)

41  
42  
43  
44  
46  
47

# CALI Study Randomization Card

Treatment: **CPAP & Caffeine**

Subject ID: \_\_\_\_\_

Site #: \_\_\_\_\_

Date/time of Randomization: \_\_\_\_/\_\_\_\_/\_\_\_\_ : \_\_\_\_  
MM / DD / YYYY HH : MM

|                                                                                                                                                   |                                                          |
|---------------------------------------------------------------------------------------------------------------------------------------------------|----------------------------------------------------------|
| <b>Complete at time of randomization</b>                                                                                                          |                                                          |
| 1. CPAP Level?                                                                                                                                    | _____ cmH2O                                              |
| 2. FiO2 requirement?                                                                                                                              | _____ %                                                  |
| 3. Vitals: HR/SpO2                                                                                                                                | HR: _____ Bpm    SpO2 _____ %                            |
| 4. Caffeine Therapy started in LDR/Resuscitation Rm?                                                                                              | <input type="checkbox"/> Yes <input type="checkbox"/> No |
| Notes/comments:                                                                                                                                   |                                                          |
| <p><b>If infant requires intubation within 72 hours of randomization, Please complete Intubation Card and call Neonatal Research at x6307</b></p> |                                                          |

**Affix patient label to back of this card**

Completed By (Name): \_\_\_\_\_ Date: \_\_\_\_/\_\_\_\_/\_\_\_\_

Use only if intubating within 72 HOURS

Use only if intubating within 72 HOURS

Date/Time of 72 hours after randomization: MM/DD/YYYY HH:MM

Date/Time of 72 hours after randomization: MM/DD/YYYY HH:MM

Subject ID: Site #:

Subject ID: Site #:

Treatment assignment: Caffeine & CPAP Caffeine & LISA

Treatment assignment: Caffeine & CPAP Caffeine & LISA

PLEASE COMPLETE & CALL Neonatal Research at X6307

PLEASE COMPLETE & CALL Neonatal Research at X6307

Form with 6 sections: 1. Date/Time of Intubation, 2. Duration of Laryngoscopy, 3. Was Intubation successful?, 4. Lowest HR during procedure?, 5. Lowest SpO2 during procedure?, 6. Reason Patient Intubated.

Form with 6 sections: 1. Date/Time of Intubation, 2. Duration of Laryngoscopy, 3. Was Intubation successful?, 4. Lowest HR during procedure?, 5. Lowest SpO2 during procedure?, 6. Reason Patient Intubated.

Affix patient label to back of this card

Affix patient label to back of this card

Completed By

Completed By

Printed Name: Initials: Date:

Printed Name: Initials: Date:

## CaLI Study Overview Diagram (Supplemental File 4)

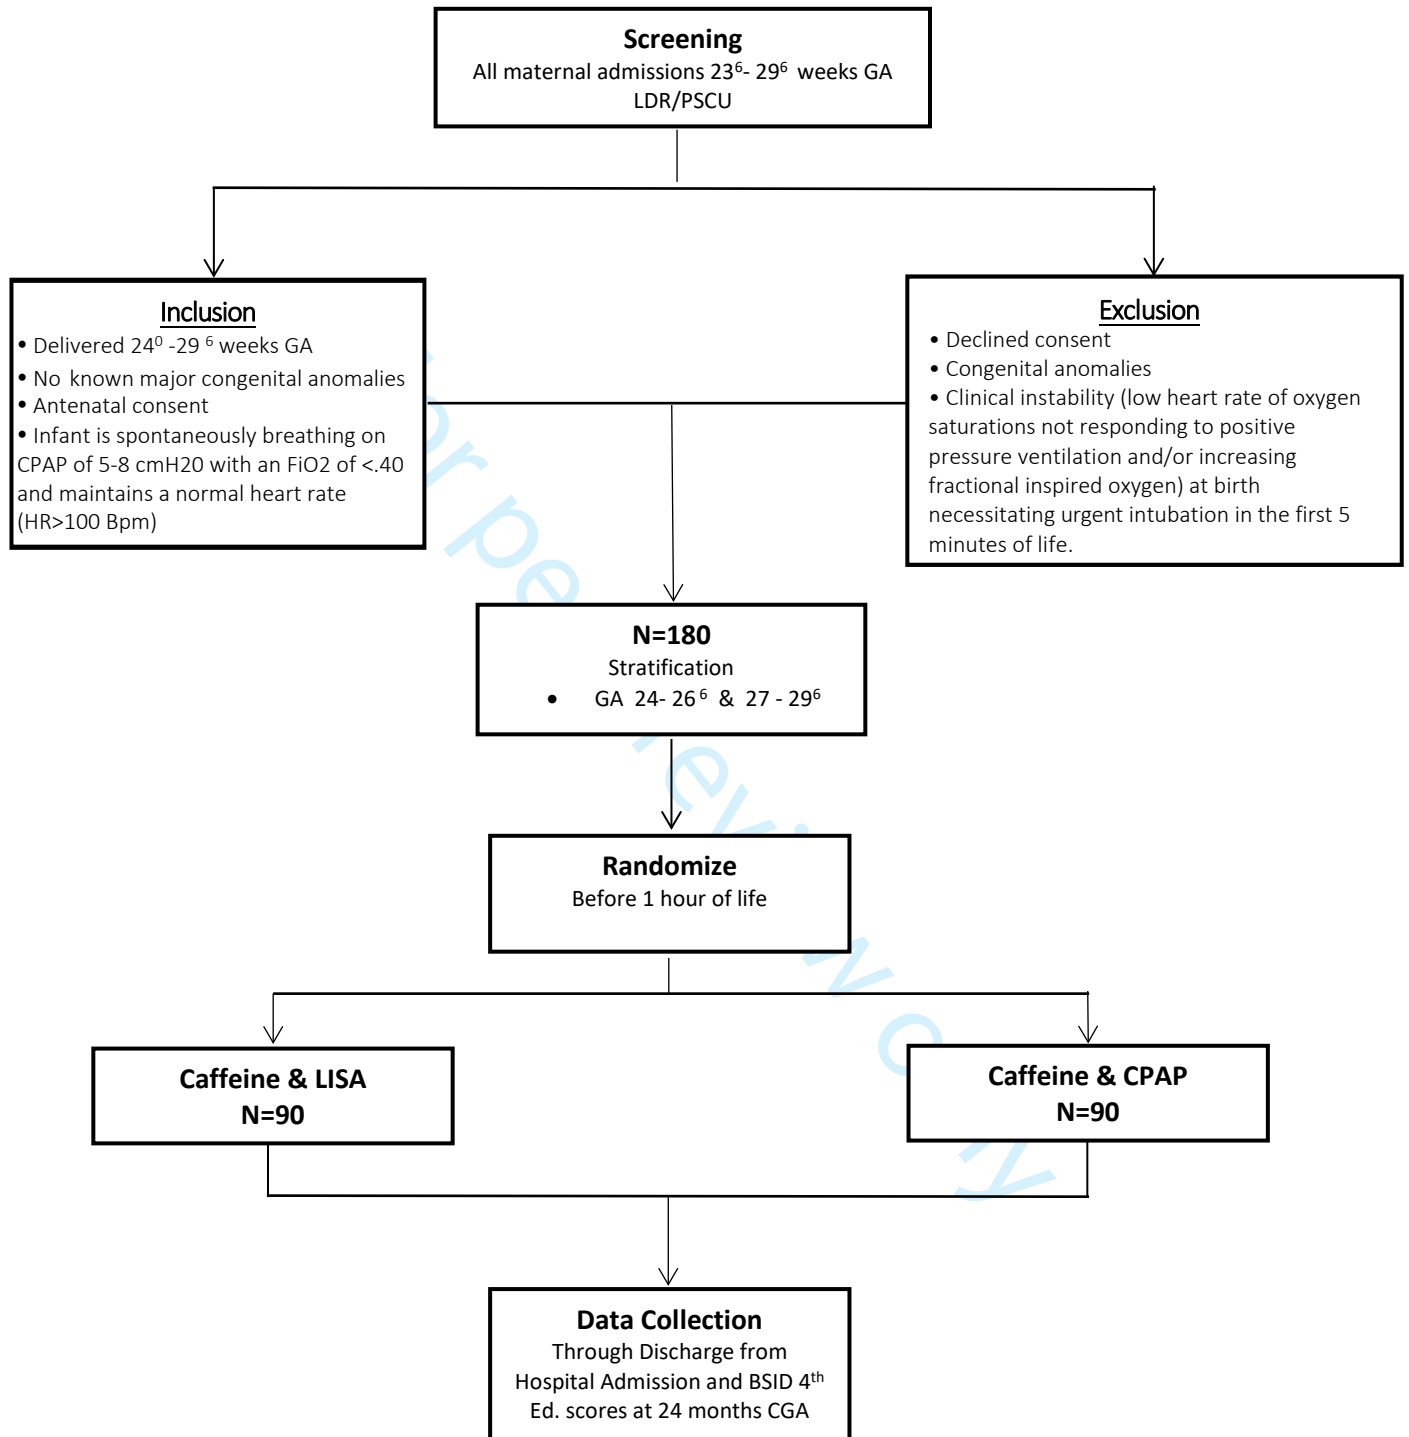

Sharp Mary Birch Hospital for Women & Newborns 2020. Legend: BSID-Bayley Scales of Infant Development, CPAP- Continuous Positive Airway Pressure, GA-Gestational Age, LDR- Labor and Delivery Room, LISA- Less Invasive Surfactant Administration, PSCU- Perinatal Special Care Unit



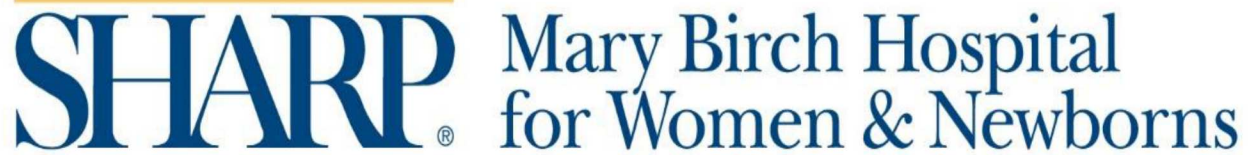

## **INFORMED CONSENT**

A Multicenter, Randomized Trial of Preterm Infants receiving **C**affeine and **L**ess **I**nvasive Surfactant Administration Compared to Caffeine and Early Continuous Positive Airway Pressure (CaLI Trial)

**IRB #**  
**1911902**

**Consent Date**  
**06Aug2020 v1.2**

### **Principal Investigator**

Anup Katheria, MD  
Neonatal Research Institute  
SHARP Mary Birch Hospital for Women and Newborns  
3003 Health Center Drive, San Diego, CA 92123

### **Research Grant**

Chiesi Farmaceutici S.p.A.

*If you are serving as a legally authorized representative, a guardian or are providing parental permission for a child in this study, the terms "you" and "your" refer to the person for whom you are providing consent or parental permission.*

**CALIFORNIA EXPERIMENTAL SUBJECT’S BILL OF RIGHTS**

You have been asked to participate as a subject in an experimental procedure. Before you decide whether you want to participate in the experimental procedure, you have a right to:

1. Be informed of the nature and purpose of the experiment;
2. Be given an explanation of the procedures to be followed in the medical experiment, and any drug or device to be utilized;
3. Be given a description of any discomforts and risks reasonably to be expected from your participation in the experiment;
4. Be given an explanation of any benefits reasonably to be expected from your participation in the experiment;
5. Be given a disclosure of any appropriate alternative procedures, drugs or devices that might be advantageous to you, and their relative risks and benefits;
6. Be informed of the avenues of medical treatment, if any, available to you after the experimental procedure if complications arise;
7. Be given an opportunity to ask any questions concerning the medical experiment or the procedures involved;
8. Be instructed that consent to participate in the experimental procedure may be withdrawn at any time and that you may discontinue participation in the medical experiment without prejudice;
9. Be given a copy of this form and the signed and dated written consent form; and
10. Be given the opportunity to decide to consent or not to consent to the medical experiment without the intervention of any element of force, fraud, deceit, duress, coercion or undue influence on your decision.

I have carefully read the information contained above and I understand fully my rights as a potential subject in a medical experiment involving people as subjects.

---

|                                                             |              |      |
|-------------------------------------------------------------|--------------|------|
| Signature of Parent or<br>Legally Authorized Representative | Printed Name | Date |
|-------------------------------------------------------------|--------------|------|



## PARTICIPATION IN A RESEARCH STUDY

This is a research study. The purpose of a research study is to answer scientific questions. We are asking for your permission to have your baby participate in a research study so that we can learn new information that may help others in the future. Research is not the same as routine treatment or medical care.

Your participation is voluntary. You do not have to allow your baby to be in this study. You are free to say yes or no, or to allow your baby to drop out after joining. If you decide not to participate there is no penalty or loss of benefits. Whatever you decide, your baby's regular medical care will not change.

This process is known as the informed consent process. It is important that you read this consent form and ask the study doctor any questions you may have. Please take your time to make your choice. Discuss it with your friends and family.

## WHY ARE YOU BEING ASKED TO TAKE PART IN THIS STUDY?

Your baby has been chosen because he/she may be born prematurely with immature lungs and a lack of natural lung surfactant, a fluid that coats the lungs and help them remain open. Due to this condition, your baby may not breathe well at birth or in the first days after birth and may benefit from receiving surfactant medicine or continuous airway pressure to help your baby's lungs remain open and improve oxygenation. Both Surfactant administration and continuous positive airway pressure (CPAP) are currently standard treatments for premature infants that need respiratory support after delivery.

Surfactant administration traditionally involves inserting a breathing tube in your baby's airway (intubation) and placing them on a breathing machine for respiratory support. Continuing on a breathing machine for a long period of time increases your baby's chance of developing bronchopulmonary dysplasia (BPD), a chronic lung disease of the neonate. Delivery room resuscitation of very premature infants has evolved dramatically over the past decades. Optimizing the care of these newborns now involves early continuous positive airway pressure (CPAP) and the avoidance of mechanical ventilation. However, mechanical ventilation is still often used when administering surfactant as the need arises.

The LISA method (Less Invasive Surfactant Administration) is another method that involves using a small catheter to administer surfactant directly into a baby's lungs. It also involves administering a precautionary dose of surfactant, compared to the traditional method which only administers doses of surfactant as needed using the breathing tube. A recent study in Europe showed that the Less Invasive Surfactant Administration (LISA) method had the lowest risk for the development of bronchopulmonary dysplasia (BPD) when compared to mechanical ventilation. Despite these results showing it decreased the need for mechanical ventilation compared to CPAP alone, there have been no studies done in the United States and the use of the LISA method is still not widely accepted.

We are conducting this study to find out if infants that receive surfactant by the LISA method (study method) compared to early CPAP and mechanical ventilation (standard method) require less intubation and less days on respiratory support.



## HOW MANY PEOPLE WILL TAKE PART IN THIS STUDY?

Approximately 180 babies will take part in the study. We will enroll 120 babies at Sharp Mary Birch Hospital for Women & Newborns, 30 babies at Loma Linda University Medical Center, and 30 babies at University of California Irvine Medical Center.

## HOW LONG WILL YOU BE IN THE STUDY?

Your baby will be in this study from birth through 2 years of age. We will also collect information about your baby from the 2-year follow-up visit described below.

## WHAT IS INVOLVED IN THIS STUDY?

We are asking for your permission to have your baby be in a research study so that we can learn new information that may help other babies.

If you decide to let your baby take part in the current research study and your baby needs support with breathing, your baby will be given CPAP through the nose. If your baby's breathing remains stable, he/she will be randomized (meaning based on chance, like flipping a coin) to either continuing on CPAP or being given a medicine called surfactant. The surfactant medicine is a small volume of liquid that will be placed directly into your baby's lungs using a small catheter (a small flexible tube). This is called the LISA method. This medication helps keep your baby's lung inflated and improves oxygenation.

Your baby will have a 50/50 chance of being placed in either group (CPAP or LISA). After your baby is placed on CPAP or given surfactant, he/she will be carefully monitored.

In either case if your baby needs more help with breathing, your baby's doctor will decide the best way to help support your baby's breathing which may include placement of an endotracheal tube into your baby's airway.

In some cases, your baby may require additional surfactant, if they are not breathing well or continue to need increased support such as additional oxygen. If your baby is in the CPAP group and becomes unwell in this study, your baby's doctor may decide to provide an initial dose of surfactant, and maybe more doses, as needed. This would require insertion of a regular endotracheal breathing tube (if not already placed), which is the current standard practice for providing surfactant.

If your baby is in the LISA group and becomes unwell in this study, your baby's doctor may decide to provide additional doses of surfactant as needed. This will be done by insertion of a regular endotracheal tube.

The procedures of the study are described below. The decision for treatment will be made at the first 5 minutes after your baby's birth.

- The doctor will evaluate your baby's condition at birth. If your doctor determines that your baby needs immediate placement of an endotracheal tube to assist breathing, your baby will not be in the study. Babies who are intubated at birth will not be in the study.
- If your baby is stable and breathing on his/her own with CPAP, he/she will be randomized to either the LISA group with CPAP or CPAP alone. This is done by selecting an envelope which contains a card telling the team which treatment the baby will receive.

During the NICU hospitalization, your baby will be continuously monitored to check the health of your baby's heart, brain and lungs and overall condition. This is normally part of the standard care for preterm babies.

## OUTPATIENT FOLLOW-UP

All premature babies are evaluated periodically (at 6 months, then once a year) as part of routine care at the Nemeth NICU Follow-up Clinic during the first 2 years of life. At these visits, the doctors and nurses who work at the clinic will check your baby's health and development. At every visit, they will ask questions about your living arrangements and your baby's medical condition. They will evaluate your baby's development using toys and items that are part of a developmental test. They will do a physical exam and check your baby's muscle strength and reflexes (neurologic exam).

## WHAT IS THE RESEARCH PART OF OUTPATIENT FOLLOW-UP?

The research visit is between 22-26 months corrected age (2 years from your baby's original due date). At this visit, the doctors and nurses will do everything listed above that is routine for your infant given their prematurity. The results of the routine evaluation will be obtained as part of our data collection. We will use a study number, not your child's name to ensure confidentiality and anonymity of your medical information.

After that, your baby's involvement will be completed and there are no further study requirements for your baby.

## WHAT ARE THE RISKS OF THE STUDY?

Both methods of administering surfactant either by the LISA method or the endotracheal tube are practiced in our NICU. The surfactant used in this trial is our current standard surfactant.

You should note:

- Infants randomized to the LISA group could receive an extra dose of surfactant when they otherwise might not have if they were not part of the study.
- Infants randomized to the CPAP group may receive mechanical ventilation that they otherwise might not have if they were not part of the study
- The catheter used in the LISA method is being used off-label, meaning it is used in a way that is different from the FDA's approved packaging label. It is used intratracheally (into the trachea) rather than intravenously (into the vein).

1  
2 Risks of surfactant include:

- 3
- 4 • Low blood oxygen level
  - 5 • Slow heart rate
  - 6 • Low blood pressure
- 7

8 Risks of Intra-tracheal catheter:

- 9
- 10 • There may be risks that are unknown at this time
- 11

12 Risks of mechanical ventilation include:

- 13
- 14 • Volutrauma- over expansion of the lungs by delivery of too much gas
  - 15 • Pneumothorax- is a collapsed lung
  - 16 • Pneumonia- lung infection
  - 17 • Development of Bronchopulmonary Dysplasia (BPD)- a chronic lung disease that affects
  - 18 premature infants
- 19

20 Based on the current literature to date, there are no increased risks with less invasive  
21 administration of surfactant with a small catheter (i.e. the LISA method) compared to  
22 endotracheal administration of surfactant in several large European trials. All risks with  
23 conducting this study are associated with prematurity including severe IVH, death, retinopathy of  
24 prematurity, chronic lung disease and other lung problems such as possible air leaks. There  
25 should be no more risks for babies in this study than are possible for any Extreme Low Birth  
26 Weight (ELBW) baby needing surfactant therapy. However, as with all research, there may be  
27 risks that are unknown at this time.  
28  
29

### 30 **ARE THERE BENEFITS TO TAKING PART IN THIS STUDY?**

31  
32  
33 There may or may not be direct benefits to your baby for participating in this study. We hope the  
34 information we learn will help babies with respiratory distress syndrome in the future.  
35

### 36 **WHAT OTHER OPTIONS ARE THERE?**

37  
38 Your baby's alternative is to not participate in this study and receive treatment of Respiratory  
39 Distress Syndrome as prescribed by your personal physician. Your doctor will discuss these  
40 alternative treatments with you as well as their benefits and risks.  
41  
42

### 43 **WILL YOU OR YOUR CHILD BE PAID TO BE IN THIS STUDY?**

44  
45 You and your child will not be paid to be in this study. No additional compensation is available  
46 for participation in this study.  
47

### 48 **WHAT ARE THE COSTS?**

49  
50 The study drug, Curosurf, will be provided for you at no cost by the study sponsor.  
51

52 There are no additional costs to be in this study. You and/or your health plan/insurance company  
53 are responsible for the cost of your baby's hospitalization and standard clinical care provided.  
54 You will be responsible for co-pays and deductibles in the same way as outside of a clinical trial.  
55  
56  
57

1  
2 For more information about your costs, please discuss with the hospital's billing department, or  
3 call your health plan/insurance company to find out your financial responsibility for this trial.  
4

## 5 **RESEARCH-RELATED INJURY**

6

7  
8 If your baby gets sick or injured in this study, please tell your study doctor. Your baby will be  
9 treated or referred for medical treatment. You or your insurance will be responsible for the cost  
10 of treatment.  
11

12 Sharp HealthCare will not provide any compensation for treatment of research related injury or  
13 illness.  
14

## 15 **PAYMENT TO STUDY SITE**

16

17  
18 CHIESI has provided a grant to Sharp Mary Birch Hospital for Women & Newborns to reimburse  
19 the study site for expenses related to the conduct of this study. This includes providing the  
20 Surfactant medication your baby may receive while in the study.  
21

## 22 **NEW INFORMATION**

23

24  
25 You will be told if any important new information is found during the course of this study that  
26 may affect your wanting to continue. If you decide to continue in the study, your study doctor  
27 may ask you to sign an updated consent form.  
28

## 29 **WHAT ABOUT CONFIDENTIALITY?**

30

31 Efforts will be made to keep your personal information confidential. We cannot guarantee  
32 absolute confidentiality. Your personal information may be disclosed if required by law.  
33 Organizations or individuals that may inspect and/or copy your medical and/or research records  
34 for quality assurance and data analysis include groups such as:  
35

- 36 • Study Doctor and Research Staff at the Neonatal Research Institute
  - 37 • Sharp HealthCare Institutional Review Board (IRB, a group of people who review the  
38 research to protect your rights)
  - 39 • The Food & Drug Administration (FDA)  
40
- 41

42 Your information will be coded and stored anonymously in a database with information about  
43 other people in this study. Access to this database is limited to the research staff.  
44 Under California law, we must report information about known or reasonably suspected  
45 incidents of abuse or neglect of a child including physical, sexual, emotional, and financial abuse  
46 or neglect. If any investigator has or is given such information, he or she may be required to  
47 report such information to the appropriate authorities.  
48  
49

50 As part of this research study you will be asked to sign an additional document,  
51 Authorization to use Protected Health Information (PHI). This authorization will explain in  
52 further detail how your and your baby's PHI will be used and shared in the study, who will  
53 have access to it, what information will be obtained, and how long Sharp HealthCare will  
54 use your information. It will also explain what to do if you decide you no longer want to  
55 share your PHI, and your rights regarding your ability to see and copy your research  
56 information.  
57

58  
59  
60

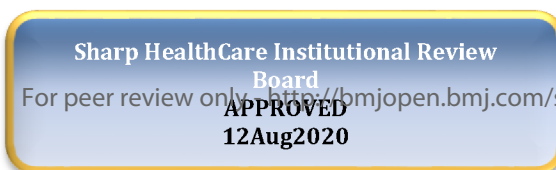

If the results of this study are published or presented at meetings, your identity will remain confidential.

## WHAT ARE YOUR RIGHTS AS A PARTICIPANT?

Participating in this study is entirely voluntary. You may refuse to allow your baby to participate or withdraw your baby at any time without penalty or loss of benefits to which you or your baby are entitled. If you decide that you no longer want your baby to continue in this study, we encourage you to talk to the study doctor. Please contact Dr. Katheria to tell him you no longer want to participate:

Dr. Anup Katheria  
(858) 939-4170  
[Anup.katheria@sharp.com](mailto:Anup.katheria@sharp.com)

If you decide to remove your baby from the study, the study team may ask your permission to keep your baby's test results and information that has already been collected.

## WHOM DO YOU CALL IF YOU HAVE ANY PROBLEMS, COMPLAINTS, CONCERNS, OR QUESTIONS?

If you have problems, complaints, concerns, or questions about this study, you may talk to your study doctor anytime.

|                                                                                                                             |                                                                                                                      |
|-----------------------------------------------------------------------------------------------------------------------------|----------------------------------------------------------------------------------------------------------------------|
| <b>If you have questions about:</b>                                                                                         | <b>Call:</b>                                                                                                         |
| This study (including complaints and requests for information)                                                              | 858-939-4170 Dr. Anup Katheria<br>858-939-6307 Neonatal Research Institute                                           |
| If you get sick or hurt in this study                                                                                       | 858-939-4170 Dr. Anup Katheria                                                                                       |
| Your rights as a research participant and:                                                                                  | Sharp HealthCare Institutional Review Board<br>7930 Frost Street, Suite 300<br>San Diego, CA 92123<br>(858) 939-7195 |
| <ul style="list-style-type: none"> <li>• Discuss problems, concerns, and questions</li> <li>• Obtain information</li> </ul> |                                                                                                                      |

## WHERE CAN YOU GET MORE INFORMATION?

A description of this clinical trial is available on <http://www.ClinicalTrials.gov>, as required by U.S. law. This web site will not include information that can identify you or other participants. At most, the web site will include a summary of the results. You can search the web site at any time. The registration identifier for this study is NCT#04209946.

**STATEMENT OF CONSENT**

Your signature below means that you have read the above information about this study and have had a chance to ask questions to help you carefully consider whether you agree to have your child take part in this study and how your and your child’s information will be used.

You can change your mind later if you want to. You will be given a copy of this consent form including a copy of the Subject’s Bill of Rights. By signing this consent form you are not giving up any of your or your child’s legal rights.

You agree to participate in this research study.

\_\_\_\_\_  
**Printed Name of Participant (Baby)**

| <b>SIGNATURE OF PARENT OR LEGALLY AUTHORIZED REPRESENTATIVE</b> | <b>PRINTED NAME</b> | <b>DATE</b> |
|-----------------------------------------------------------------|---------------------|-------------|
|                                                                 |                     |             |

\_\_\_\_\_  
**AUTHORITY OF SIGNED OR RELATIONSHIP TO PARTICIPANT**

| <b>SIGNATURE OF PRINCIPAL INVESTIGATOR/DESIGNEE</b> | <b>PRINTED NAME</b> | <b>DATE</b> |
|-----------------------------------------------------|---------------------|-------------|
|                                                     |                     |             |

----- **USE THE FOLLOWING ONLY IF APPLICABLE** -----

*If this consent form is read to the participant because the participant is unable to read the form, an impartial witness not affiliated with the research or study doctor must be present for the consent and sign the following statement:*

I confirm that the information in the consent form and any other written information was accurately explained to, and apparently understood by, the participant. The participant freely consented to be in the research study.

\_\_\_\_\_  
**PRINTED NAME OF IMPARTIAL WITNESS**

| <b>SIGNATURE OF IMPARTIAL WITNESS</b> | <b>DATE</b> | <b>TIME</b> |
|---------------------------------------|-------------|-------------|
|                                       |             |             |

**NOTE:** *This signature block cannot be used for translations into another language. A translated consent form is necessary for enrolling participants who do not speak English.*

9

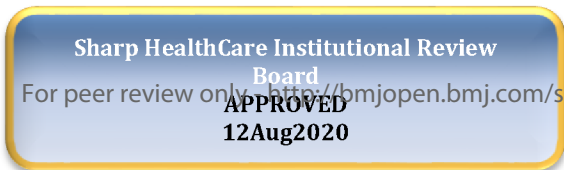

## Authorization to Use your Protected Health Information (PHI)

**Study Title:** A Multicenter, Randomized Trial of Preterm Infants receiving **C**affeine and **L**ess **I**nvasive Surfactant Administration Compared to Caffeine and Early Continuous Positive Airway Pressure (CaLI Trial)

**Investigator:** Anup Katheria, MD  
Neonatal Research Institute  
Sharp Mary Birch Hospital for Women & Newborns

**Research Grant:** Chiesi Farmaceutici S.p.A

---

**Protected Health Information**, or PHI, is any personal health information through which you or your baby can be identified. We are asking for your permission to use your baby's PHI in this research study. The information we may use includes maternal (prenatal) data from your baby's record, your baby's present health information, information that can be used to contact you, and results of your and your baby's medical tests. Maternal data will be collected from your baby's medical record; your medical record will be accessed for study purposes. The specific items of information that will be used and disclosed include:

- Maternal (prenatal) information related to the health of your baby, including:
  - Information about mother's pregnancy
  - Fetal History
  - Pregnancy complications
  - Medications for mother
  - Delivery record
- Information from your baby's medical record, including:
  - Medications for baby
  - Results of lab tests
  - Blood gases
  - Respiratory management

- Vital signs
- Diagnoses

The following people will access and use your baby's PHI for the purpose of this research:

- Dr. Anup Katheria, Primary Investigator, Sharp Mary Birch Hospital for Women & Newborns
- Sharp Mary Birch Hospital Neonatologists
- Research Staff at Sharp Mary Birch Hospital for Women & Newborns

### **Who may see your PHI?**

Certain offices and people other than the researchers may look at your medical charts and study records. There may be times when federal or state law requires the sharing of such records. This is very unlikely, but if sharing the information is ever required, Sharp Mary Birch Hospital for Women & Newborns will take steps allowable by law to protect the confidentiality of personal information. If this information is shared with outside reviewers for audit purposes, it may be further shared by them and may not be covered by the federal privacy laws.

Representatives that may review your study records:

- the Sharp HealthCare Institutional Review Board (IRB; a group of people that review the research to protect the rights of research participants)
- the US Food and Drug Administration

### **How long will the Neonatal Research Institute use your information, and what will it be used for?**

- Your and your baby's PHI may be used and shared until December 31, 2044.

The groups above will use your health information:

- To complete this research
- To evaluate the results of the study
- To check that the study is being done properly

### **What if you change your mind and want to withdraw your authorization for the use and disclosure of your PHI for this study?**



You must write to the study doctor and tell him that you no longer want to share your child’s information at: Anup Katheria, MD. Neonatal Research Institute, Sharp Mary Birch Hospital for Women & Newborns, 3003 Health Center Drive, San Diego, CA 92123.

- Your baby will no longer be a part of the research study because the study doctor, and the research staff will not be able to use any new information about your baby.
- The research team can continue to use any of the PHI that was already collected.
- You and your baby will still get the same medical care that you have always had from Sharp Mary Birch Hospital for Women & Newborns.

**Do you have the right to see and receive a copy of your research information?**

You can see your research information if:

- It is also being used for your and your baby’s current treatment, or
- At the end of the study.

\*\*\*\*\*

**Authorization:**

If you agree to share your and your baby’s PHI, you must sign this form below. If you do not sign this form, you and your baby will not be able to participate in this research study. You will be given a copy of this form.

\_\_\_\_\_  
Printed Names of Mother and Baby

|                                                                   |                       |               |
|-------------------------------------------------------------------|-----------------------|---------------|
| _____<br>Signature of Mother or Legally Authorized Representative | _____<br>Printed Name | _____<br>Date |
|-------------------------------------------------------------------|-----------------------|---------------|

|                              |                       |               |
|------------------------------|-----------------------|---------------|
| _____<br>Signature of Father | _____<br>Printed Name | _____<br>Date |
|------------------------------|-----------------------|---------------|

\_\_\_\_\_  
Authority of Signee or Relationship to Participant

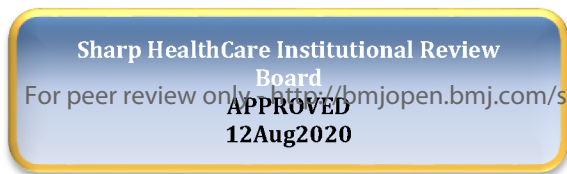



SPIRIT 2013 Checklist: Recommended items to address in a clinical trial protocol and related documents\*

| Section/item                      | Item No | Description                                                                                                                                                                                                                                                                              |
|-----------------------------------|---------|------------------------------------------------------------------------------------------------------------------------------------------------------------------------------------------------------------------------------------------------------------------------------------------|
| <b>Administrative information</b> |         |                                                                                                                                                                                                                                                                                          |
| Title                             | 1       | Descriptive title identifying the study design, population, interventions, and, if applicable, trial acronym                                                                                                                                                                             |
| Trial registration                | 2a      | Trial identifier and registry name. If not yet registered, name of intended registry                                                                                                                                                                                                     |
|                                   | 2b      | All items from the World Health Organization Trial Registration Data Set                                                                                                                                                                                                                 |
| Protocol version                  | 3       | Date and version identifier                                                                                                                                                                                                                                                              |
| Funding                           | 4       | Sources and types of financial, material, and other support                                                                                                                                                                                                                              |
| Roles and responsibilities        | 5a      | Names, affiliations, and roles of protocol contributors                                                                                                                                                                                                                                  |
|                                   | 5b      | Name and contact information for the trial sponsor                                                                                                                                                                                                                                       |
|                                   | 5c      | Role of study sponsor and funders, if any, in study design; collection, management, analysis, and interpretation of data; writing of the report; and the decision to submit the report for publication, including whether they will have ultimate authority over any of these activities |
|                                   | 5d      | Composition, roles, and responsibilities of the coordinating centre, steering committee, endpoint adjudication committee, data management team, and other individuals or groups overseeing the trial, if applicable (see Item 21a for data monitoring committee)                         |
| <b>Introduction</b>               |         |                                                                                                                                                                                                                                                                                          |
| Background and rationale          | 6a      | Description of research question and justification for undertaking the trial, including summary of relevant studies (published and unpublished) examining benefits and harms for each intervention                                                                                       |
|                                   | 6b      | Explanation for choice of comparators                                                                                                                                                                                                                                                    |
| Objectives                        | 7       | Specific objectives or hypotheses                                                                                                                                                                                                                                                        |
| Trial design                      | 8       | Description of trial design including type of trial (eg, parallel group, crossover, factorial, single group), allocation ratio, and framework (eg, superiority, equivalence, noninferiority, exploratory)                                                                                |

## Methods: Participants, interventions, and outcomes

|                      |     |                                                                                                                                                                                                                                                                                                                                                                                |
|----------------------|-----|--------------------------------------------------------------------------------------------------------------------------------------------------------------------------------------------------------------------------------------------------------------------------------------------------------------------------------------------------------------------------------|
| Study setting        | 9   | Description of study settings (eg, community clinic, academic hospital) and list of countries where data will be collected. Reference to where list of study sites can be obtained                                                                                                                                                                                             |
| Eligibility criteria | 10  | Inclusion and exclusion criteria for participants. If applicable, eligibility criteria for study centres and individuals who will perform the interventions (eg, surgeons, psychotherapists)                                                                                                                                                                                   |
| Interventions        | 11a | Interventions for each group with sufficient detail to allow replication, including how and when they will be administered                                                                                                                                                                                                                                                     |
|                      | 11b | Criteria for discontinuing or modifying allocated interventions for a given trial participant (eg, drug dose change in response to harms, participant request, or improving/worsening disease)                                                                                                                                                                                 |
|                      | 11c | Strategies to improve adherence to intervention protocols, and any procedures for monitoring adherence (eg, drug tablet return, laboratory tests)                                                                                                                                                                                                                              |
|                      | 11d | Relevant concomitant care and interventions that are permitted or prohibited during the trial                                                                                                                                                                                                                                                                                  |
| Outcomes             | 12  | Primary, secondary, and other outcomes, including the specific measurement variable (eg, systolic blood pressure), analysis metric (eg, change from baseline, final value, time to event), method of aggregation (eg, median, proportion), and time point for each outcome. Explanation of the clinical relevance of chosen efficacy and harm outcomes is strongly recommended |
| Participant timeline | 13  | Time schedule of enrolment, interventions (including any run-ins and washouts), assessments, and visits for participants. A schematic diagram is highly recommended (see Figure)                                                                                                                                                                                               |
| Sample size          | 14  | Estimated number of participants needed to achieve study objectives and how it was determined, including clinical and statistical assumptions supporting any sample size calculations                                                                                                                                                                                          |
| Recruitment          | 15  | Strategies for achieving adequate participant enrolment to reach target sample size                                                                                                                                                                                                                                                                                            |

## Methods: Assignment of interventions (for controlled trials)

### Allocation:

|                     |     |                                                                                                                                                                                                                                                                                                                                                          |
|---------------------|-----|----------------------------------------------------------------------------------------------------------------------------------------------------------------------------------------------------------------------------------------------------------------------------------------------------------------------------------------------------------|
| Sequence generation | 16a | Method of generating the allocation sequence (eg, computer-generated random numbers), and list of any factors for stratification. To reduce predictability of a random sequence, details of any planned restriction (eg, blocking) should be provided in a separate document that is unavailable to those who enrol participants or assign interventions |
|---------------------|-----|----------------------------------------------------------------------------------------------------------------------------------------------------------------------------------------------------------------------------------------------------------------------------------------------------------------------------------------------------------|

|    |                |     |                                                                         |
|----|----------------|-----|-------------------------------------------------------------------------|
| 1  |                |     |                                                                         |
| 2  | Allocation     | 16b | Mechanism of implementing the allocation sequence (eg, central          |
| 3  | concealment    |     | telephone; sequentially numbered, opaque, sealed envelopes),            |
| 4  | mechanism      |     | describing any steps to conceal the sequence until interventions are    |
| 5  |                |     | assigned                                                                |
| 6  |                |     |                                                                         |
| 7  | Implementation | 16c | Who will generate the allocation sequence, who will enrol participants, |
| 8  |                |     | and who will assign participants to interventions                       |
| 9  |                |     |                                                                         |
| 10 | Blinding       | 17a | Who will be blinded after assignment to interventions (eg, trial        |
| 11 | (masking)      |     | participants, care providers, outcome assessors, data analysts), and    |
| 12 |                |     | how                                                                     |
| 13 |                | 17b | If blinded, circumstances under which unblinding is permissible, and    |
| 14 |                |     | procedure for revealing a participant's allocated intervention during   |
| 15 |                |     | the trial                                                               |
| 16 |                |     |                                                                         |
| 17 |                |     |                                                                         |
| 18 |                |     |                                                                         |
| 19 |                |     |                                                                         |

### Methods: Data collection, management, and analysis

|    |                 |     |                                                                          |
|----|-----------------|-----|--------------------------------------------------------------------------|
| 20 |                 |     |                                                                          |
| 21 | Data collection | 18a | Plans for assessment and collection of outcome, baseline, and other      |
| 22 | methods         |     | trial data, including any related processes to promote data quality (eg, |
| 23 |                 |     | duplicate measurements, training of assessors) and a description of      |
| 24 |                 |     | study instruments (eg, questionnaires, laboratory tests) along with      |
| 25 |                 |     | their reliability and validity, if known. Reference to where data        |
| 26 |                 |     | collection forms can be found, if not in the protocol                    |
| 27 |                 | 18b | Plans to promote participant retention and complete follow-up,           |
| 28 |                 |     | including list of any outcome data to be collected for participants who  |
| 29 |                 |     | discontinue or deviate from intervention protocols                       |
| 30 |                 |     |                                                                          |
| 31 | Data            | 19  | Plans for data entry, coding, security, and storage, including any       |
| 32 | management      |     | related processes to promote data quality (eg, double data entry;        |
| 33 |                 |     | range checks for data values). Reference to where details of data        |
| 34 |                 |     | management procedures can be found, if not in the protocol               |
| 35 |                 |     |                                                                          |
| 36 | Statistical     | 20a | Statistical methods for analysing primary and secondary outcomes.        |
| 37 | methods         |     | Reference to where other details of the statistical analysis plan can be |
| 38 |                 |     | found, if not in the protocol                                            |
| 39 |                 | 20b | Methods for any additional analyses (eg, subgroup and adjusted           |
| 40 |                 |     | analyses)                                                                |
| 41 |                 | 20c | Definition of analysis population relating to protocol non-adherence     |
| 42 |                 |     | (eg, as randomised analysis), and any statistical methods to handle      |
| 43 |                 |     | missing data (eg, multiple imputation)                                   |
| 44 |                 |     |                                                                          |
| 45 |                 |     |                                                                          |
| 46 |                 |     |                                                                          |
| 47 |                 |     |                                                                          |
| 48 |                 |     |                                                                          |
| 49 |                 |     |                                                                          |
| 50 |                 |     |                                                                          |
| 51 |                 |     |                                                                          |

### Methods: Monitoring

|    |                 |     |                                                                      |
|----|-----------------|-----|----------------------------------------------------------------------|
| 52 |                 |     |                                                                      |
| 53 | Data monitoring | 21a | Composition of data monitoring committee (DMC); summary of its role  |
| 54 |                 |     | and reporting structure; statement of whether it is independent from |
| 55 |                 |     | the sponsor and competing interests; and reference to where further  |
| 56 |                 |     | details about its charter can be found, if not in the protocol.      |
| 57 |                 |     | Alternatively, an explanation of why a DMC is not needed             |
| 58 |                 |     |                                                                      |
| 59 |                 |     |                                                                      |
| 60 |                 |     |                                                                      |

|    |          |     |                                                                        |
|----|----------|-----|------------------------------------------------------------------------|
| 1  |          | 21b | Description of any interim analyses and stopping guidelines, including |
| 2  |          |     | who will have access to these interim results and make the final       |
| 3  |          |     | decision to terminate the trial                                        |
| 4  |          |     |                                                                        |
| 5  |          |     |                                                                        |
| 6  | Harms    | 22  | Plans for collecting, assessing, reporting, and managing solicited and |
| 7  |          |     | spontaneously reported adverse events and other unintended effects     |
| 8  |          |     | of trial interventions or trial conduct                                |
| 9  |          |     |                                                                        |
| 10 |          |     |                                                                        |
| 11 | Auditing | 23  | Frequency and procedures for auditing trial conduct, if any, and       |
| 12 |          |     | whether the process will be independent from investigators and the     |
| 13 |          |     | sponsor                                                                |
| 14 |          |     |                                                                        |

### Ethics and dissemination

|    |                   |     |                                                                               |
|----|-------------------|-----|-------------------------------------------------------------------------------|
| 15 |                   |     |                                                                               |
| 16 |                   |     |                                                                               |
| 17 | Research ethics   | 24  | Plans for seeking research ethics committee/institutional review board        |
| 18 | approval          |     | (REC/IRB) approval                                                            |
| 19 |                   |     |                                                                               |
| 20 |                   |     |                                                                               |
| 21 | Protocol          | 25  | Plans for communicating important protocol modifications (eg,                 |
| 22 | amendments        |     | changes to eligibility criteria, outcomes, analyses) to relevant parties      |
| 23 |                   |     | (eg, investigators, REC/IRBs, trial participants, trial registries, journals, |
| 24 |                   |     | regulators)                                                                   |
| 25 |                   |     |                                                                               |
| 26 | Consent or assent | 26a | Who will obtain informed consent or assent from potential trial               |
| 27 |                   |     | participants or authorised surrogates, and how (see Item 32)                  |
| 28 |                   |     |                                                                               |
| 29 |                   | 26b | Additional consent provisions for collection and use of participant data      |
| 30 |                   |     | and biological specimens in ancillary studies, if applicable                  |
| 31 |                   |     |                                                                               |
| 32 |                   |     |                                                                               |
| 33 | Confidentiality   | 27  | How personal information about potential and enrolled participants will       |
| 34 |                   |     | be collected, shared, and maintained in order to protect confidentiality      |
| 35 |                   |     | before, during, and after the trial                                           |
| 36 |                   |     |                                                                               |
| 37 | Declaration of    | 28  | Financial and other competing interests for principal investigators for       |
| 38 | interests         |     | the overall trial and each study site                                         |
| 39 |                   |     |                                                                               |
| 40 |                   |     |                                                                               |
| 41 | Access to data    | 29  | Statement of who will have access to the final trial dataset, and             |
| 42 |                   |     | disclosure of contractual agreements that limit such access for               |
| 43 |                   |     | investigators                                                                 |
| 44 |                   |     |                                                                               |
| 45 | Ancillary and     | 30  | Provisions, if any, for ancillary and post-trial care, and for                |
| 46 | post-trial care   |     | compensation to those who suffer harm from trial participation                |
| 47 |                   |     |                                                                               |
| 48 | Dissemination     | 31a | Plans for investigators and sponsor to communicate trial results to           |
| 49 | policy            |     | participants, healthcare professionals, the public, and other relevant        |
| 50 |                   |     | groups (eg, via publication, reporting in results databases, or other         |
| 51 |                   |     | data sharing arrangements), including any publication restrictions            |
| 52 |                   |     |                                                                               |
| 53 |                   | 31b | Authorship eligibility guidelines and any intended use of professional        |
| 54 |                   |     | writers                                                                       |
| 55 |                   |     |                                                                               |
| 56 |                   |     |                                                                               |
| 57 |                   | 31c | Plans, if any, for granting public access to the full protocol, participant-  |
| 58 |                   |     | level dataset, and statistical code                                           |
| 59 |                   |     |                                                                               |
| 60 |                   |     |                                                                               |

**Appendices**

|                            |    |                                                                                                                                                                                                |
|----------------------------|----|------------------------------------------------------------------------------------------------------------------------------------------------------------------------------------------------|
| Informed consent materials | 32 | Model consent form and other related documentation given to participants and authorised surrogates                                                                                             |
| Biological specimens       | 33 | Plans for collection, laboratory evaluation, and storage of biological specimens for genetic or molecular analysis in the current trial and for future use in ancillary studies, if applicable |

---

\*It is strongly recommended that this checklist be read in conjunction with the SPIRIT 2013 Explanation & Elaboration for important clarification on the items. Amendments to the protocol should be tracked and dated. The SPIRIT checklist is copyrighted by the SPIRIT Group under the Creative Commons "[Attribution-NonCommercial-NoDerivs 3.0 Unported](#)" license.

For peer review only
