# Supplementary material for: Multicentre, randomised trial of preterm infants receiving caffeine and less invasive surfactant administration compared with caffeine and early continuous positive airway pressure (CaLI trial): study protocol
Source: PubMed Central journal article supplement — BMJ Open. 2021 Jan 22;11(1):e038343. doi: 10.1136/bmjopen-2020-038343 (PMC7825253; doi:10.1136/bmjopen-2020-038343), 2021-01-22
Supplement: bmjopen-2020-038343supp001.pdf [file bmjopen-2020-038343supp001.pdf]

## CALI Study Randomization Card

## CALI Randomization Card

Treatment: **LISA & Caffeine**

Subject ID: \_\_\_\_\_ Site #: \_\_\_\_\_

Date/time of Randomization: \_\_\_\_/\_\_\_\_/\_\_\_\_ : \_\_\_\_  
MM / DD / YYYY HH : MM**PLEASE REFER ON BACK OF CARD FOR LISA PROCEDURAL CHECKLIST**

|                                                                                                         |                                                                                                 |
|---------------------------------------------------------------------------------------------------------|-------------------------------------------------------------------------------------------------|
| FiO2: _____ CPAP: _____ SpO2: _____ HR: _____ at randomization                                          |                                                                                                 |
| 1. Caffeine Therapy started in LDR/Resuscitation Rm?                                                    | <input type="checkbox"/> Yes <input type="checkbox"/> No                                        |
| 2. Start time of LISA ( <i>from Laryngoscopy attempt</i> )                                              | Time: ____:____<br>HH : MM                                                                      |
| 3. Duration of Laryngoscopy attempt? ( <i>Time of insertion to removal</i> )                            | 1 <sup>st</sup> _____ seconds<br>2 <sup>nd</sup> _____ seconds<br>3 <sup>rd</sup> _____ seconds |
| 4. Successful placement of LISA catheter?                                                               | <input type="checkbox"/> Yes <input type="checkbox"/> No                                        |
| 5. Total surfactant administered (2.5 mL/kg)                                                            | _____ mLs                                                                                       |
| 6. End time of LISA ( <i>removal of angiocatheter</i> )                                                 | Time: ____:____<br>HH : MM                                                                      |
| 7. Surfactant aspirated from stomach or leaked from mouth ( <i>failure/regurgitation from trachea</i> ) | <input type="checkbox"/> Yes <input type="checkbox"/> No                                        |
| 8. Amount surfactant aspirated?                                                                         | _____ mLs                                                                                       |
| 9. Lowest HR during procedure?                                                                          | _____ Bpm                                                                                       |
| 10. Lowest SpO2 during procedure?                                                                       | _____ %                                                                                         |
| 11. Interventions?                                                                                      | Notes:                                                                                          |

**Affix patient label to back of this card**

Completed By (Name): \_\_\_\_\_ Date: \_\_\_\_/\_\_\_\_/\_\_\_\_

Sharp Mary Birch Hospital for Women &amp; Newborns. (2020). CaLI Study Randomization Card. v1.0

## CALI Study Randomization Card

## CALI Randomization Card

**Supplies for LISA procedure:**

- 16g angiocatheter, measured and marked insertion length with tape or Sharpie, NEEDLE REMOVED
- Laryngoscope size:  00     0
- Laryngoscope type:  Video     Conventional
- Curosurf 2.5 mL/kg/dose in syringe
- 8 FR feeding tube and compatible syringe
- 2- 10 mL syringe
- Blunt plastic needle
- 7 inch IV small bore extension tubing

**PROCEDURE:**

- At randomization infant will be on CPAP
- Infant will be positioned in a “sniffing position”
- An 8 FR orogastric (OG) tube will be placed and gastric contents aspirated. OG tube should remain in place during the LISA procedure
- Ensure adequate CPAP and Vital Signs (VS) stable
- Place IV for IV Caffeine loading dose
- Obtain 16 gauge catheter and **remove needle**
- Measure depth of catheter insertion using clean technique (6 + wt in Kg) mark with a small piece of intubation tape or sharpie
- Provider visualizes vocal cords, inserts & stabilizes angiocatheter
- RCP attaches 7 inch IV small bore extension tubing to angiocatheter
- RCP attaches syringe with Curosurf to the extension tubing
- RCP slowly administers Curosurf over 1-2 minutes (approximately in 3 aliquots) while infant is spontaneously breathing on CPAP
- RCP will flush angiocath with 5 mLs of air to clear surfactant from angiocatheter
- Provider will remove angiocatheter and infant will continue on CPAP therapy
- Wean FiO2 as tolerated

**If infant requires intubation within 72 hours, Please complete Intubation Card and call Neonatal Research at x6307**

Sharp Mary Birch Hospital for Women & Newborns. (2020). CaLI Study Randomization Card. v1.0

(Supplemental File 1)
