# Supplementary material for: Multicentre, randomised trial of preterm infants receiving caffeine and less invasive surfactant administration compared with caffeine and early continuous positive airway pressure (CaLI trial): study protocol
Source: PubMed Central journal article supplement — BMJ Open. 2021 Jan 22;11(1):e038343. doi: 10.1136/bmjopen-2020-038343 (PMC7825253; doi:10.1136/bmjopen-2020-038343), 2021-01-22
Supplement: bmjopen-2020-038343supp002.pdf [file bmjopen-2020-038343supp002.pdf]

## CALI Study Randomization Card

Treatment: **CPAP & Caffeine**

Subject ID: \_\_\_\_\_

Site #: \_\_\_\_\_

Date/time of Randomization: \_\_\_\_/\_\_\_\_/\_\_\_\_ : \_\_\_\_  
MM / DD / YYYY HH : MM

| Complete at time of randomization                                                                                                                 |                                                          |
|---------------------------------------------------------------------------------------------------------------------------------------------------|----------------------------------------------------------|
| 1. CPAP Level?                                                                                                                                    | _____ cmH <sub>2</sub> O                                 |
| 2. FiO <sub>2</sub> requirement?                                                                                                                  | _____ %                                                  |
| 3. Vitals: HR/SpO <sub>2</sub>                                                                                                                    | HR: _____ Bpm SpO <sub>2</sub> _____ %                   |
| 4. Caffeine Therapy started in LDR/Resuscitation Rm?                                                                                              | <input type="checkbox"/> Yes <input type="checkbox"/> No |
| Notes/comments:                                                                                                                                   |                                                          |
| <p><b>If infant requires intubation within 72 hours of randomization, Please complete Intubation Card and call Neonatal Research at x6307</b></p> |                                                          |

**Affix patient label to back of this card**

Completed By (Name): \_\_\_\_\_ Date: \_\_\_\_/\_\_\_\_/\_\_\_\_

Sharp Mary Birch Hospital for Women & Newborns. (2020). CaLI Study Randomization Card. v1.0

(Supplemental File 2)
