# Supplementary material for: Multicentre, randomised trial of preterm infants receiving caffeine and less invasive surfactant administration compared with caffeine and early continuous positive airway pressure (CaLI trial): study protocol
Source: PubMed Central journal article supplement — BMJ Open. 2021 Jan 22;11(1):e038343. doi: 10.1136/bmjopen-2020-038343 (PMC7825253; doi:10.1136/bmjopen-2020-038343), 2021-01-22
Supplement: bmjopen-2020-038343supp003.pdf [file bmjopen-2020-038343supp003.pdf]

**CaLI STUDY**Use only if intubating within **72 HOURS**Date/Time of 72 hours after randomization: \_\_\_/\_\_\_/\_\_\_ : \_\_\_  
MM/ DD/ YYYY HH : MM

Subject ID: \_\_\_\_\_ Site #: \_\_\_\_\_

Treatment assignment:  **Caffeine & CPAP**  **Caffeine & LISA**

| PLEASE COMPLETE & CALL Neonatal Research at X6307              |                                                                                                                                                                                                                                                                                                                                                                                           |
|----------------------------------------------------------------|-------------------------------------------------------------------------------------------------------------------------------------------------------------------------------------------------------------------------------------------------------------------------------------------------------------------------------------------------------------------------------------------|
| 1. Date/Time of Intubation                                     | ___/___/___ : ___<br>MM/ DD/ YYYY HH : MM                                                                                                                                                                                                                                                                                                                                                 |
| 2. Duration of Laryngoscopy?<br>(Time of insertion to removal) | 1 <sup>st</sup> _____ seconds<br>2 <sup>nd</sup> _____ seconds<br>3 <sup>rd</sup> _____ seconds                                                                                                                                                                                                                                                                                           |
| 3. Was Intubation successful?                                  | <input type="checkbox"/> Yes <input type="checkbox"/> No                                                                                                                                                                                                                                                                                                                                  |
| 4. Lowest HR during procedure?                                 | _____ Bpm                                                                                                                                                                                                                                                                                                                                                                                 |
| 5. Lowest SpO2 during procedure?                               | _____ %                                                                                                                                                                                                                                                                                                                                                                                   |
| 6. Reason Patient Intubated<br>(check all that apply)          | <input type="checkbox"/> Requiring FiO2 > .40 for more than 2 hours to maintain SpO2 >90%<br><input type="checkbox"/> Any 2 blood gases 2 hours after randomization: (pH 7.15 or less <b>OR</b> paCO2 > 65 mmHg)<br><input type="checkbox"/> MD decision<br><input type="checkbox"/> Apnea<br><input type="checkbox"/> Surfactant administration<br><input type="checkbox"/> Other: _____ |

Affix patient label to back of this card

Completed By

Printed Name: \_\_\_\_\_ Initials: \_\_\_\_\_ Date: \_\_\_/\_\_\_/\_\_\_

Sharp Mary Birch Hospital for Women & Newborns. (2020). CaLI Study Intubation Card. v1.0  
(Supplemental File 3)**CaLI STUDY**Use only if intubating within **72 HOURS**Date/Time of 72 hours after randomization: \_\_\_/\_\_\_/\_\_\_ : \_\_\_  
MM/ DD/ YYYY HH : MM

Subject ID: \_\_\_\_\_ Site #: \_\_\_\_\_

Treatment assignment:  **Caffeine & CPAP**  **Caffeine & LISA**

| PLEASE COMPLETE & CALL Neonatal Research at X6307              |                                                                                                                                                                                                                                                                                                                                                                                           |
|----------------------------------------------------------------|-------------------------------------------------------------------------------------------------------------------------------------------------------------------------------------------------------------------------------------------------------------------------------------------------------------------------------------------------------------------------------------------|
| 1. Date/Time of Intubation                                     | ___/___/___ : ___<br>MM/ DD/ YYYY HH : MM                                                                                                                                                                                                                                                                                                                                                 |
| 2. Duration of Laryngoscopy?<br>(Time of insertion to removal) | 1 <sup>st</sup> _____ seconds<br>2 <sup>nd</sup> _____ seconds<br>3 <sup>rd</sup> _____ seconds                                                                                                                                                                                                                                                                                           |
| 3. Was Intubation successful?                                  | <input type="checkbox"/> Yes <input type="checkbox"/> No                                                                                                                                                                                                                                                                                                                                  |
| 4. Lowest HR during procedure?                                 | _____ Bpm                                                                                                                                                                                                                                                                                                                                                                                 |
| 5. Lowest SpO2 during procedure?                               | _____ %                                                                                                                                                                                                                                                                                                                                                                                   |
| 6. Reason Patient Intubated<br>(check all that apply)          | <input type="checkbox"/> Requiring FiO2 > .40 for more than 2 hours to maintain SpO2 >90%<br><input type="checkbox"/> Any 2 blood gases 2 hours after randomization: (pH 7.15 or less <b>OR</b> paCO2 > 65 mmHg)<br><input type="checkbox"/> MD decision<br><input type="checkbox"/> Apnea<br><input type="checkbox"/> Surfactant administration<br><input type="checkbox"/> Other: _____ |

Affix patient label to back of this card

Completed By

Printed Name: \_\_\_\_\_ Initials: \_\_\_\_\_ Date: \_\_\_/\_\_\_/\_\_\_
