# Supplementary material for: Multicentre, randomised trial of preterm infants receiving caffeine and less invasive surfactant administration compared with caffeine and early continuous positive airway pressure (CaLI trial): study protocol
Source: PubMed Central journal article supplement — BMJ Open. 2021 Jan 22;11(1):e038343. doi: 10.1136/bmjopen-2020-038343 (PMC7825253; doi:10.1136/bmjopen-2020-038343), 2021-01-22
Supplement: bmjopen-2020-038343supp004.pdf [file bmjopen-2020-038343supp004.pdf]

## CaLI Study Overview Diagram (Supplemental File 4)

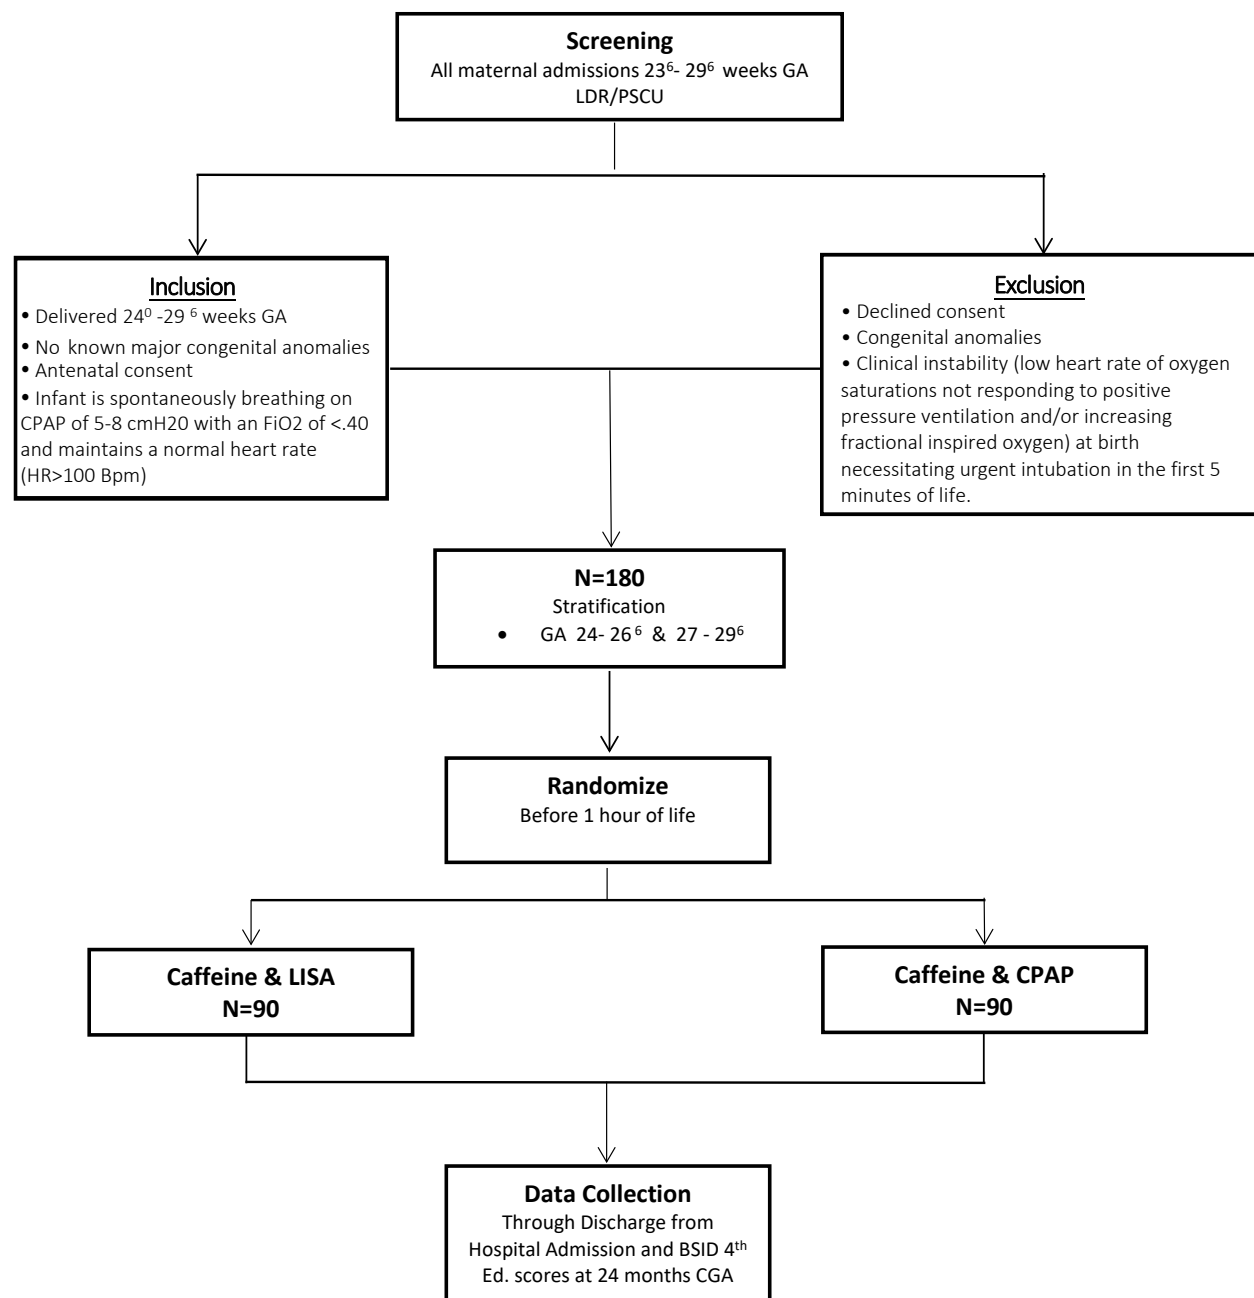

Sharp Mary Birch Hospital for Women & Newborns 2020, Legend: BSID-Bayley Scales of Infant Development, CPAP- Continuous Positive Airway Pressure, GA-Gestational Age, LDR- Labor and Delivery Room, LISA- Less Invasive Surfactant Administration, PSCU- Perinatal Special Care Unit
