# Supplementary material for: Multicentre, randomised trial of preterm infants receiving caffeine and less invasive surfactant administration compared with caffeine and early continuous positive airway pressure (CaLI trial): study protocol
Source: PubMed Central journal article supplement — BMJ Open. 2021 Jan 22;11(1):e038343. doi: 10.1136/bmjopen-2020-038343 (PMC7825253; doi:10.1136/bmjopen-2020-038343), 2021-01-22
Supplement: bmjopen-2020-038343supp005.pdf [file bmjopen-2020-038343supp005.pdf]

Figure 1. CaLI Study Patient Timeline

| <b>Assessment</b>                                    | <b>On admission prior to study treatment</b> | <b>0</b> | <b>5'</b> | <b>15'</b> | <b>30'</b> | <b>1-h</b> | <b>2-h</b> | <b>6-h</b> | <b>12-h</b> | <b>24-h</b> | <b>2-d</b> | <b>3-d</b> | <b>Day 28</b> | <b>36-WK PMA</b> | <b>Discharge home</b> | <b>24-m BSID</b> |
|------------------------------------------------------|----------------------------------------------|----------|-----------|------------|------------|------------|------------|------------|-------------|-------------|------------|------------|---------------|------------------|-----------------------|------------------|
| <b>Inclusion/Exclusion Criteria</b>                  | x                                            |          |           |            |            |            |            |            |             |             |            |            |               |                  |                       |                  |
| <b>Parental Informed Consent</b>                     | x                                            |          |           |            |            |            |            |            |             |             |            |            |               |                  |                       |                  |
| <b>Apgar Score</b>                                   | x                                            | x        | x         |            |            |            |            |            |             |             |            |            |               |                  |                       |                  |
| <b>Demographic data (weight)</b>                     | x                                            |          | x         |            |            |            |            |            |             |             |            |            | x             | x                | x                     | x                |
| <b>Oxygen Saturation (SpO<sub>2</sub>)</b>           | x                                            | x        | x         | x          | x          | x          | x          | x          | x           | x           | x          | x          | x             | x                | x                     |                  |
| <b>Vital Sign (HR)</b>                               | x                                            | x        | x         | x          | x          | x          | x          | x          | x           | x           | x          | x          | x             | x                | x                     |                  |
| <b>Fraction of Inspired Oxygen (FIO<sub>2</sub>)</b> | x                                            | x        | x         | x          | x          | x          | x          | x          | x           | x           | x          | x          | x             | x                | x                     | x                |
| <b>CPAP Level</b>                                    | x                                            | ←→       |           |            |            |            |            |            |             |             |            |            |               |                  |                       |                  |
| <b>Caffeine Therapy</b>                              | x                                            | ←→       |           |            |            |            |            |            |             |             |            |            |               |                  |                       |                  |
| <b>Bronchopulmonary Dysplasia (BPD)</b>              |                                              |          |           |            |            |            |            |            |             |             |            |            | x             | x                | x                     |                  |
| <b>Severe Adverse Events (SAEs)</b>                  | x                                            | ←→       |           |            |            |            |            |            |             |             |            |            |               |                  |                       |                  |
| <b>Bayley Scales of Infant Development (BSID)</b>    |                                              |          |           |            |            |            |            |            |             |             |            |            |               |                  |                       | x                |

Parental Informed Consent will be obtained prior to birth. Vital signs will be obtained at randomization and during surfactant administration. SAEs are surfactant administration procedure-related and or death prior to discharge.

x indicates continuous monitoring ←→ indicates possible discontinuation during hospital admission

Sharp Mary Birch Hospital for Women & Newborns (version 21OCT2020)
